# Supplementary material for: Complex Genetic Architecture of Cardiac Disease in a Wild Type Inbred Strain of Drosophila melanogaster
Source: PLoS One. 2013 Apr 29;8(4):e62909. doi: 10.1371/journal.pone.0062909 (PMC3639251; doi:10.1371/journal.pone.0062909)
Supplement: Table S3 — Heart phenotype assessment of 170 RILs generated from fly heart movies and analysis, recorded by Semi-automated Optical Heart Assays (SOHA) [25], [31]. The heart phenotype parameters of each RIL is calculated from 6 to 12 individual movies. (XLSX) [file pone.0062909.s006.xlsx]

## Sheet: RIL.csv
Heart phenotype among 170 RILs individual fly movie recorded by Semi-automated Optical Heart Assays (SOHA).
File Name	Genotype	Age (week)	Heart Rate	Heart Period	Diastolic Interval	Systolic Interval	Arrhythmia Index (AI)	Diastole Diameter (DD)	Systole Diameter (SD)	Fraction Shortening
RIL99_04_1wkf_EM10x1_30s	RIL99	1	2.02786	0.493271	0.278142	0.215129	0.0191895	54.7098	34.5168	0.369094
RIL99_03_1wkf_EM10x1_30s	RIL99	1	1.45066	0.70081	0.489733	0.2121	0.126075	67.2057	35.9375	0.465261
RIL99_09_1wkf_EM10x1_30s	RIL99	1	0.757302	1.33983	1.14348	0.20349	0.105252	53.148	32.8125	0.38262
RIL99_05_1wkf_EM10x1_30s	RIL99	1	2.5279	0.426386	0.227212	0.197353	0.262686	67.2057	37.5325	0.441527
RIL99_01_1wkf_EM10x1_30s	RIL99	1	1.42643	0.702287	0.477988	0.224771	0.042631	43.7779	26.7457	0.389059
RIL99_07_1wkf_EM10x1_30s	RIL99	1	1.31908	0.760707	0.556935	0.209197	0.0528408	70.3819	50.0244	0.289243
RIL99_10_1wkf_EM10x1_30s	RIL99	1	0.993897	1.0722	0.832156	0.266815	0.183953	67.4776	36.4769	0.459421
RIL99_02_1wkf_EM10x1_30s	RIL99	1	1.01699	1.63019	1.47821	0.233489	0.265324	69.1925	43.7779	0.367303
RIL99_08_1wkf_EM10x1_30s	RIL99	1	1.79528	0.557653	0.338026	0.219627	0.033483	51.5862	25.0488	0.514428
RIL99_06_1wkf_EM10x1_30s	RIL99	1	1.85546	0.562274	0.340049	0.223102	0.291186	69.1925	39.1873	0.433648
RIL98_01_1wkf_EM10x1_30s	RIL98	1	0.844991	1.21382	0.948767	0.291397	0.129244	73.4541	32.8497	0.552786
RIL98_04_1wkf_EM10x1_30s	RIL98	1	0.755924	1.52091	1.26656	0.259617	0.526192	81.265	43.75	0.461638
RIL98_10_1wkf_EM10x1_30s	RIL98	1	1.72354	0.580318	0.374023	0.206295	0.0145042	82.8272	53.148	0.358327
RIL98_07_1wkf_EM10x1_30s	RIL98	1	1.0317	1.02657	0.815231	0.23169	0.262501	81.265	46.901	0.422863
RIL98_11_1wkf_EM10x1_30s	RIL98	1	0.857478	1.32146	1.02206	0.320439	0.542579	71.892	46.9791	0.346533
RIL98_02_1wkf_EM10x1_30s	RIL98	1	1.14069	0.945577	0.716563	0.250137	0.275421	78.2655	48.4627	0.380791
RIL98_03_1wkf_EM10x1_30s	RIL98	1	0.898664	1.2067	0.981755	0.26283	0.168499	75.0651	35.9715	0.520796
RIL98_08_1wkf_EM10x1_30s	RIL98	1	1.08188	0.926203	0.738957	0.189573	0.0439456	57.8336	23.4895	0.593843
RIL98_09_1wkf_EM10x1_30s	RIL98	1	3.48434	0.287231	0.119288	0.168488	0.0295834	64.0816	35.9375	0.439191
RIL98_06_1wkf_EM10x1_30s	RIL98	1	1.98385	0.506276	0.298557	0.207719	0.0652193	75.0163	40.655	0.45805
RIL98_12_1wkf_EM10x1_30s	RIL98	1	0.684648	1.55404	1.34727	0.261575	0.159714	57.8125	37.5325	0.350789
RIL98_05_1wkf_EM10x1_30s	RIL98	1	0.626671	1.77058	1.5353	0.265789	0.278708	78.2655	42.3031	0.459493
RIL97_01_1wkf_EM10x1_30s	RIL97	1	1.20098	0.877751	0.645101	0.250905	0.135538	70.0032	42.6582	0.390625
RIL97_02_1wkf_EM10x1_30s	RIL97	1	0.964527	1.04365	0.807841	0.243219	0.0801572	60.2484	35.0187	0.418762
RIL97_03_1wkf_EM10x1_30s	RIL97	1	2.06581	0.485406	0.272659	0.211798	0.0501529	84.9017	44.2415	0.47891
RIL97_04_1wkf_EM10x1_30s	RIL97	1	0.80427	1.25403	1.02408	0.235414	0.0933571	51.4202	39.392	0.23392
RIL97_05_1wkf_EM10x1_30s	RIL97	1	1.09621	0.948171	0.70721	0.257225	0.152953	48.1272	26.2512	0.454545
RIL97_06_1wkf_EM10x1_30s	RIL97	1	1.0298	1.28664	1.08985	0.231811	0.88499	55.7945	33.9254	0.391958
RIL97_06_1wkf_EM10x1_30s	RIL97	1	0.944792	1.1342	0.945919	0.203518	0.234576	56.5962	42.4471	0.25
RIL97_01_1wkf_EM10x1_30s	RIL97	1	1.8487	0.555005	0.400509	0.15753	0.173132	46.875	31.289	0.332501
RIL97_05_1wkf_EM10x1_30s	RIL97	1	1.0931	0.918542	0.72351	0.195033	0.0636592	64.3667	39.1873	0.391186
RIL97_03_1wkf_EM10x1_30s	RIL97	1	2.86198	0.363794	0.20262	0.163629	0.0968176	48.5382	35.9715	0.258904
RIL97_02_1wkf_EM10x1_30s	RIL97	1	2.21508	0.451947	0.288932	0.163201	0.0334534	37.5	23.4375	0.375
RIL97_04_1wkf_EM10x1_30s	RIL97	1	1.94159	0.541285	0.365522	0.180679	0.268408	57.8125	34.4105	0.404791
RIL96_2_1wkf_10x9300_30	RIL96	1	1.02177	0.986764	0.781722	0.208756	0.0908558	41.5644	26.2512	0.368421
RIL96_3_1wkf_10x9300_30	RIL96	1	0.78639	1.31616	1.075	0.26817	0.186574	42.6722	29.5326	0.30792
RIL96_4_1wkf_10x9300_30	RIL96	1	2.04891	0.493265	0.294273	0.200332	0.0897046	48.1396	24.0636	0.500129
RIL96_5_1wkf_10x9300_30	RIL96	1	0.900642	1.18778	0.950249	0.257462	0.216522	41.5644	25.1812	0.394165
RIL96_6_1wkf_10x9300_30	RIL96	1	1.15522	0.869224	0.661862	0.21105	0.0641139	47.0461	30.6264	0.349013
RIL96_7_1wkf_10x9300_30	RIL96	1	1.29723	0.776062	0.577677	0.196058	0.0805418	47.0842	27.345	0.419233
RIL96_8_1wkf_10x9300_30	RIL96	1	2.25901	0.44611	0.245998	0.201452	0.080587	47.0461	24.0636	0.48851
RIL96_06_1wkf_EM10x1_30s	RIL96	1	1.89409	0.528357	0.347331	0.181578	0.0266743	65.6994	39.1873	0.403536
RIL96_05_1wkf_EM10x1_30s	RIL96	1	1.82188	0.549402	0.356917	0.193827	0.0302943	54.7098	37.5	0.314565
RIL96_04_1wkf_EM10x1_30s	RIL96	1	1.40407	0.776989	0.585122	0.203807	0.252703	55.0435	39.5593	0.281307
RIL96_02_1wkf_EM10x1_30s	RIL96	1	1.62327	0.645845	0.472606	0.181287	0.182407	59.3956	37.5325	0.368092
RIL96_03_1wkf_EM10x1_30s	RIL96	1	1.85059	0.558452	0.375368	0.183095	0.177861	42.3031	34.4105	0.186572
RIL96_01_1wkf_EM10x1_30s	RIL96	1	1.59707	0.676111	0.489799	0.193977	0.197589	67.2057	54.7767	0.184939
RIL95_07_1wkf_EM10x1_30s	RIL95	1	1.79827	0.561697	0.36845	0.197304	0.0916422	67.3508	39.0625	0.420014
RIL95_06_1wkf_EM10x1_30s	RIL95	1	1.27251	0.787596	0.589252	0.200221	0.0462382	59.3956	28.125	0.52648
RIL95_03_1wkf_EM10x1_30s	RIL95	1	2.23317	0.514837	0.308263	0.211706	0.189354	62.5195	40.655	0.349723
RIL95_02_1wkf_EM10x1_30s	RIL95	1	1.61626	0.892582	0.641228	0.263985	1.52468	62.6755	40.625	0.35182
RIL95_11_1wkf_EM10x1_30s	RIL95	1	2.05277	0.487546	0.27001	0.218772	0.0278505	65.625	36.2419	0.447742
RIL95_09_1wkf_EM10x1_30s	RIL95	1	1.39186	0.720126	0.543823	0.176303	0.0474812	76.5625	46.875	0.387755
RIL95_05_1wkf_EM10x1_30s	RIL95	1	1.78083	0.562632	0.344759	0.217873	0.0453916	65.6436	29.6875	0.547747
RIL95_08_1wkf_EM10x1_30s	RIL95	1	1.3108	0.796104	0.623067	0.184893	0.163981	64.1387	32.8497	0.487833
RIL95_10_1wkf_EM10x1_30s	RIL95	1	2.07392	0.499668	0.324446	0.178349	0.173946	75.26	35.9715	0.522037
RIL95_12_1wkf_EM10x1_30s	RIL95	1	0.956692	1.09397	0.905792	0.215642	0.155415	73.4375	37.5	0.489362
RIL95_01_1wkf_EM10x1_30s	RIL95	1	1.0427	0.965613	0.706304	0.266537	0.0802801	56.25	29.7286	0.471492
RIL95_04_1wkf_EM10x1_30s	RIL95	1	1.29959	0.772705	0.530468	0.242237	0.0636721	51.5862	26.6084	0.484195
RIL94_10_1wkf_10x9300_30	RIL94	1	1.65557	1.22766	0.936891	0.219303	3.26859	78.7612	36.0954	0.541711
RIL94_11_1wkf_10x9300_30	RIL94	1	1.24593	0.803723	0.585404	0.218319	0.0361393	58.0642	32.8322	0.434553
RIL94_1_1wkf_10x9300_30	RIL94	1	1.01091	1.0889	0.828928	0.289626	0.235176	64.5713	41.6219	0.355411
RIL94_2_1wkf_10x9300_30	RIL94	1	0.684989	1.50443	1.26505	0.274181	0.14826	74.5792	43.8749	0.411701
RIL94_3_1wkf_10x9300_30	RIL94	1	1.23829	0.815306	0.569946	0.253278	0.0808316	57.255	33.9254	0.407467
RIL94_4_1wkf_10x9300_30	RIL94	1	1.78276	1.18614	0.906546	0.272836	3.41026	55.8802	36.112	0.353761
RIL94_5_1wkf_10x9300_30	RIL94	1	1.34665	0.932837	0.716028	0.223784	0.659648	60.6443	32.0205	0.471994
RIL94_6_1wkf_10x9300_30	RIL94	1	1.46648	0.687653	0.466586	0.223246	0.0870761	36.5074	20.811	0.429952
RIL94_7_1wkf_10x9300_30	RIL94	1	0.68305	1.65679	1.40871	0.256856	0.265084	61.2626	35.0187	0.428384
RIL94_8_1wkf_10x9300_30	RIL94	1	1.52431	0.711727	0.484324	0.238584	0.129416	51.9756	27.6928	0.467197
RIL94_9_1wkf_10x9300_30	RIL94	1	1.04358	1.01817	0.797273	0.239167	0.187228	59.0652	31.7391	0.462644
RIL93_06_1wkf_EM10x1_30s	RIL93	1	1.55205	0.664057	0.455137	0.218541	0.134752	53.3314	31.4059	0.411119
RIL93_01_1wkf_EM10x1_30s	RIL93	1	0.785214	1.2754	1.07209	0.205281	0.0390441	45.3394	34.5168	0.238703
RIL93_08_1wkf_EM10x1_30s	RIL93	1	0.939706	1.54903	1.23766	0.302236	0.435931	48.4627	32.8497	0.322166
RIL93_02_1wkf_EM10x1_30s	RIL93	1	1.67378	0.606081	0.403248	0.202833	0.0975218	46.875	36.0731	0.23044
RIL93_09_1wkf_EM10x1_30s	RIL93	1	2.80011	0.597227	0.407799	0.197158	0.455702	42.4471	28.1684	0.336389
RIL93_10_1wkf_EM10x1_30s	RIL93	1	2.11093	0.476216	0.254259	0.221957	0.0781137	76.5784	64.1387	0.162445
RIL93_04_1wkf_EM10x1_30s	RIL93	1	1.07002	0.948503	0.715992	0.232511	0.109143	64.0625	34.375	0.463415
RIL93_03_1wkf_EM10x1_30s	RIL93	1	1.47397	0.694925	0.456253	0.248785	0.0989768	60.9375	45.3394	0.255968
RIL93_11_1wkf_EM10x1_30s	RIL93	1	1.49077	0.684277	0.464634	0.219643	0.15047	75	42.2164	0.437114
RIL93_07_1wkf_EM10x1_30s	RIL93	1	0.896113	1.34211	1.13846	0.2429	0.303379	65.6994	48.4627	0.262357
RIL93_05_1wkf_EM10x1_30s	RIL93	1	0.609815	1.75179	1.28413	0.473265	0.230009	36.0731	20.3725	0.435244
RIL92_02_1wkf_EM10x1_30s	RIL92	1	2.8828	0.396511	0.166861	0.22965	0.947067	64.0625	32.8497	0.487224
RIL92_07_1wkf_EM10x1_30s	RIL92	1	1.39782	0.718149	0.525116	0.195936	0.0611586	68.821	39.0625	0.432404
RIL92_05_1wkf_EM10x1_30s	RIL92	1	1.76685	0.569767	0.360546	0.211837	0.0823416	60.9375	39.0625	0.358974
RIL92_01_1wkf_EM10x1_30s	RIL92	1	2.51402	0.398426	0.16986	0.229999	0.0375776	60.9575	35.9715	0.409893
RIL92_06_1wkf_EM10x1_30s	RIL92	1	2.38573	0.419758	0.237714	0.182273	0.0394574	69.3863	39.8361	0.425879
RIL92_11_1wkf_EM10x1_30s	RIL92	1	1.20874	0.828929	0.637067	0.196545	0.0438879	62.5	31.4059	0.497506
RIL92_03_1wkf_EM10x1_30s	RIL92	1	1.04332	0.986261	0.776618	0.221939	0.137014	56.445	29.6875	0.474045
RIL92_04_1wkf_EM10x1_30s	RIL92	1	0.912588	1.26789	1.02731	0.231336	0.228499	72.0277	39.0937	0.45724
RIL92_10_1wkf_EM10x1_30s	RIL92	1	0.861105	1.16396	0.957282	0.206673	0.0483196	35.9715	21.875	0.391879
RIL92_08_1wkf_EM10x1_30s	RIL92	1	1.34599	0.9335	0.734399	0.221996	0.164609	56.2717	33.1456	0.410972
RIL91_10_1wkf_10x9300_30	RIL91	1	1.01905	1.02227	0.806745	0.221423	0.191383	80.9708	49.2332	0.391964
RIL91_11_1wkf_10x9300_30	RIL91	1	1.92682	0.536443	0.359231	0.179219	0.18627	70.1398	38.283	0.45419
RIL91_1_1wkf_10x9300_30	RIL91	1	1.23971	0.820346	0.619123	0.213106	0.104072	87.5313	47.0842	0.462087
RIL91_2_1wkf_10x9300_30	RIL91	1	0.876681	1.15426	0.947417	0.223693	0.0940817	108.485	66.7577	0.384636
RIL91_3_1wkf_10x9300_30	RIL91	1	1.90628	0.591902	0.372986	0.214688	0.307079	79.3665	51.6987	0.348608
RIL91_4_1wkf_10x9300_30	RIL91	1	1.12241	0.92688	0.745799	0.201231	0.120758	71.1054	42.6582	0.400071
RIL91_5_1wkf_10x9300_30	RIL91	1	1.53294	0.72649	0.559055	0.180524	0.239462	94.124	59.0753	0.372367
RIL91_6_1wkf_10x9300_30	RIL91	1	1.68013	0.617315	0.452361	0.171124	0.170429	68.3778	40.5297	0.407269
RIL91_7_1wkf_10x9300_30	RIL91	1	1.6859	0.593302	0.413281	0.180021	0.0160967	65.7737	40.4854	0.384474
RIL91_8_1wkf_10x9300_30	RIL91	1	1.14837	0.914528	0.698979	0.213529	0.27683	68.9094	39.392	0.428351
RIL91_9_1wkf_10x9300_30	RIL91	1	1.58169	0.663322	0.492706	0.179816	0.175954	51.5944	33.9783	0.341435
RIL90_10_1wkf_EM10x1_30s	RIL90	1	1.54382	0.647845	0.421075	0.227214	0.0126359	49.2332	36.112	0.266511
RIL90_11_1wkf_EM10x1_30s	RIL90	1	1.2774	1.19188	1.02933	0.202812	0.433128	54.7884	33.9254	0.380791
RIL90_12_1wkf_EM10x1_30s	RIL90	1	1.51187	0.663022	0.463476	0.201098	0.0489735	72.1908	55.8267	0.226679
RIL90_1_1wkf_EM10x1_30s	RIL90	1	1.37364	0.742917	0.497591	0.25572	0.108841	49.4151	36.112	0.269211
RIL90_2_1wkf_EM10x1_30s	RIL90	1	1.10511	0.9348	0.78536	0.168262	0.115852	74.6674	42.6722	0.428502
RIL90_3_1wkf_EM10x1_30s	RIL90	1	1.81169	0.562034	0.360566	0.202427	0.192957	58.0642	36.1616	0.377213
RIL90_4_1wkf_EM10x1_30s	RIL90	1	1.62571	0.632719	0.398787	0.233932	0.189553	68.9181	41.5644	0.396901
RIL90_5_1wkf_EM10x1_30s	RIL90	1	1.69485	0.605183	0.388479	0.216705	0.15948	50.6112	37.7638	0.253844
RIL90_6_1wkf_EM10x1_30s	RIL90	1	1.51879	0.680781	0.486911	0.19387	0.148685	63.6757	44.8458	0.295716
RIL90_7_1wkf_EM10x1_30s	RIL90	1	2.08182	0.51078	0.283279	0.227501	0.232358	58.0642	39.6191	0.317667
RIL90_8_1wkf_EM10x1_30s	RIL90	1	1.43398	0.709721	0.533251	0.185813	0.0962027	62.9577	42.6722	0.322208
RIL90_9_1wkf_EM10x1_30s	RIL90	1	1.48721	0.684544	0.528073	0.166788	0.0947072	49.813	33.2666	0.332169
RIL9_04_1wkf_EM10x1_30s	RIL9	1	0.895218	1.15994	0.977636	0.207905	0.150869	81.6247	50.0244	0.387142
RIL9_09_1wkf_EM10x1_30s	RIL9	1	0.908407	1.21517	1.03214	0.193816	0.26555	69.0335	39.1873	0.432344
RIL9_11_1wkf_EM10x1_30s	RIL9	1	2.19818	0.457512	0.273017	0.184496	0.0748953	43.75	20.3125	0.535714
RIL9_03_1wkf_EM10x1_30s	RIL9	1	1.90649	0.526177	0.337923	0.191085	0.0494759	54.7767	32.8125	0.400977
RIL9_06_1wkf_EM10x1_30s	RIL9	1	2.809	0.356214	0.169473	0.186778	0.0247044	53.2168	40.655	0.236049
RIL9_02_1wkf_EM10x1_30s	RIL9	1	2.19642	0.47523	0.226117	0.249113	0.258458	74.0335	46.9791	0.365435
RIL9_01_1wkf_EM10x1_30s	RIL9	1	1.98019	0.506132	0.286049	0.222322	0.0434208	73.4541	43.8615	0.402873
RIL9_07_1wkf_EM10x1_30s	RIL9	1	1.13415	1.02901	0.839974	0.211297	0.336732	79.7028	50.0244	0.372363
RIL9_05_1wkf_EM10x1_30s	RIL9	1	2.31215	0.439778	0.256577	0.186987	0.0928126	76.5784	46.901	0.387543
RIL9_10_1wkf_EM10x1_30s	RIL9	1	1.69843	0.721636	0.573307	0.151396	0.366786	76.5784	50.0244	0.346756
RIL9_12_1wkf_EM10x1_30s	RIL9	1	1.89069	0.530947	0.358271	0.176169	0.0519956	54.888	39.0937	0.287755
RIL9_08_1wkf_EM10x1_30s	RIL9	1	1.81654	0.551649	0.362664	0.188985	0.0466949	64.5371	42.3031	0.344515
RIL89_05_1wkf_EM10x1_30s	RIL89	1	1.34546	0.822151	0.576626	0.249921	0.383135	75.0163	40.655	0.45805
RIL89_01_1wkf_EM10x1_30s	RIL89	1	0.746892	1.39637	1.12839	0.29167	0.180879	84.5051	46.875	0.4453
RIL89_10_1wkf_EM10x1_30s	RIL89	1	0.930064	1.15672	0.951403	0.239241	0.170233	70.5897	39.1873	0.444858
RIL89_06_1wkf_EM10x1_30s	RIL89	1	2.02749	0.498735	0.292774	0.210783	0.0963776	66.0884	34.6931	0.47505
RIL89_12_1wkf_EM10x1_30s	RIL89	1	1.22485	0.820191	0.611147	0.210467	0.0692828	82.8714	45.4201	0.451921
RIL89_03_1wkf_EM10x1_30s	RIL89	1	2.98019	0.335629	0.16155	0.174089	0.0156136	73.703	48.6638	0.339731
RIL89_07_1wkf_EM10x1_30s	RIL89	1	0.993474	1.02098	0.836702	0.191076	0.115444	78.125	48.8391	0.37486
RIL89_11_1wkf_EM10x1_30s	RIL89	1	2.20682	0.470907	0.272694	0.199709	0.259145	78.125	39.0625	0.5
RIL89_02_1wkf_EM10x1_30s	RIL89	1	0.805718	1.34759	1.07008	0.277507	0.190613	71.892	37.5325	0.477932
RIL89_08_1wkf_EM10x1_30s	RIL89	1	2.62585	0.382041	0.166146	0.215895	0.0556847	70.1735	28.8111	0.589431
RIL89_04_1wkf_EM10x1_30s	RIL89	1	1.023	1.02552	0.789992	0.250809	0.208693	81.9829	43.8615	0.464992
RIL89_09_1wkf_EM10x1_30s	RIL89	1	1.37899	0.774739	0.534178	0.240561	0.266967	61.0176	39.0937	0.359304
RIL88_10_1wkf_10x9300_30	RIL88	1	0.852957	1.47951	1.28288	0.25303	0.906988	57.255	35.0187	0.388373
RIL88_11_1wkf_10x9300_30	RIL88	1	1.13906	0.905836	0.717654	0.19458	0.159476	53.5962	30.7044	0.427116
RIL88_1_1wkf_10x9300_30	RIL88	1	1.20409	0.833364	0.631386	0.204398	0.0573117	45.9526	26.2512	0.428733
RIL88_2_1wkf_10x9300_30	RIL88	1	1.22185	1.13051	0.883105	0.248642	0.516885	48.1272	22.9958	0.522186
RIL88_3_1wkf_10x9300_30	RIL88	1	0.461422	2.27671	2.02134	0.2599	0.269836	55.7838	40.4854	0.274245
RIL88_4_1wkf_10x9300_30	RIL88	1	1.02442	1.18339	1.02252	0.202596	0.327877	64.5342	40.4706	0.372881
RIL88_5_1wkf_10x9300_30	RIL88	1	1.21849	0.85437	0.659046	0.214559	0.131712	35.0699	25.2523	0.279943
RIL88_6_1wkf_10x9300_30	RIL88	1	0.782976	1.44856	1.28343	0.219096	0.267183	53.7745	31.7391	0.409775
RIL88_7_1wkf_10x9300_30	RIL88	1	1.14111	0.909085	0.694008	0.218373	0.156189	55.8802	36.0954	0.354058
RIL88_8_1wkf_10x9300_30	RIL88	1	1.3098	0.7661	0.577577	0.189611	0.057655	39.3768	24.0636	0.388889
RIL88_9_1wkf_10x9300_30	RIL88	1	1.686	0.597851	0.409587	0.193079	0.0775829	49.2696	29.6135	0.398949
RIL87_10_1wkf_EM10x1_30s	RIL87	1	1.87488	0.666644	0.449893	0.21137	0.744623	64.2338	37.63	0.414171
RIL87_12_1wkf_EM10x1_30s	RIL87	1	1.1089	1.14345	0.951928	0.194114	0.361441	53.125	26.6084	0.499136
RIL87_08_1wkf_EM10x1_30s	RIL87	1	1.10781	0.954775	0.721161	0.237502	0.195798	51.7751	32.8497	0.365532
RIL87_07_1wkf_EM10x1_30s	RIL87	1	1.21539	0.932199	0.721657	0.221019	0.367499	64.0816	42.1875	0.341659
RIL87_02_1wkf_EM10x1_30s	RIL87	1	1.90001	0.52781	0.296694	0.234166	0.0461534	45.3125	28.125	0.37931
RIL87_09_1wkf_EM10x1_30s	RIL87	1	2.01147	0.506136	0.31124	0.19764	0.15412	51.7751	32.8125	0.36625
RIL87_06_1wkf_EM10x1_30s	RIL87	1	1.72011	0.641665	0.422766	0.224746	0.295201	40.655	26.7457	0.342131
RIL87_03_1wkf_EM10x1_30s	RIL87	1	2.14725	0.48918	0.300084	0.194007	0.105298	46.9791	28.1684	0.400406
RIL87_04_1wkf_EM10x1_30s	RIL87	1	0.794492	1.37895	1.14435	0.2346	0.374695	57.8125	31.289	0.458784
RIL87_05_1wkf_EM10x1_30s	RIL87	1	1.04233	0.981846	0.738446	0.257151	0.138672	45.4201	31.289	0.31112
RIL87_01_1wkf_EM10x1_30s	RIL87	1	1.62855	0.754224	0.510625	0.249895	0.984848	73.4541	35.9715	0.510287
RIL87_11_1wkf_EM10x1_30s	RIL87	1	2.08994	0.480666	0.30081	0.184347	0.0580219	41.103	21.9307	0.466444
RIL86_09_1wkf_EM10x1_30s	RIL86	1	1.5298	0.725851	0.509328	0.216785	0.244634	57.8336	32.8497	0.431997
RIL86_03_1wkf_EM10x1_30s	RIL86	1	1.2353	0.91678	0.705735	0.21969	0.495051	87.6255	59.3956	0.322166
RIL86_07_1wkf_EM10x1_30s	RIL86	1	1.94189	0.530503	0.33739	0.19913	0.151765	70.3299	42.3031	0.398505
RIL86_04_1wkf_EM10x1_30s	RIL86	1	0.888672	1.1442	0.941143	0.208778	0.113923	50.0976	29.7286	0.406586
RIL86_02_1wkf_EM10x1_30s	RIL86	1	1.5334	0.672919	0.457695	0.215891	0.214365	89.0762	54.7767	0.385058
RIL86_11_1wkf_EM10x1_30s	RIL86	1	1.12605	1.02897	0.827886	0.227871	0.273694	70.3819	39.3427	0.441011
RIL86_10_1wkf_EM10x1_30s	RIL86	1	1.55664	0.642988	0.430133	0.214671	0.0306654	65.7922	46.875	0.28753
RIL86_05_1wkf_EM10x1_30s	RIL86	1	2.22208	0.460062	0.262713	0.197209	0.210832	68.75	36.0731	0.4753
RIL86_12_1wkf_EM10x1_30s	RIL86	1	2.00024	0.501115	0.303122	0.197992	0.0473002	72.9539	42.3031	0.420139
RIL86_08_1wkf_EM10x1_30s	RIL86	1	2.16542	0.4626	0.26063	0.201969	0.0423458	78.3746	43.7779	0.441428
RIL86_06_1wkf_EM10x1_30s	RIL86	1	1.68519	0.595203	0.402882	0.194461	0.0569801	87.5139	45.4201	0.480996
RIL86_01_1wkf_EM10x1_30s	RIL86	1	0.835549	1.47988	1.30235	0.238004	0.343954	85.9375	50.0976	0.417047
RIL85_4_1wkf_EM10x1_30s	RIL85	1	1.21917	0.844437	0.447683	0.403326	0.156672	20.811	16.4434	0.209867
RIL85_5_1wkf_EM10x1_30s	RIL85	1	1.18706	0.846643	0.584041	0.270512	0.0634954	32.8868	16.4434	0.5
RIL85_9_1wkf_EM10x1_30s	RIL85	1	1.10682	0.915543	0.672997	0.255722	0.0898008	26.274	10.938	0.583695
RIL85_3_1wkf_EM10x1_30s	RIL85	1	1.04234	0.970994	0.678403	0.286735	0.106522	31.1109	17.5349	0.436372
RIL85_10_1wkf_EM10x1_30s	RIL85	1	1.20785	0.854294	0.59698	0.280931	0.156351	29.5528	18.5946	0.370802
RIL85_6_1wkf_EM10x1_30s	RIL85	1	2.70605	0.370756	0.206108	0.165828	0.0583341	47.0461	22.9958	0.511207
RIL85_7_1wkf_EM10x1_30s	RIL85	1	1.12276	0.913797	0.650474	0.271432	0.142436	45.9396	20.811	0.546993
RIL85_8_1wkf_EM10x1_30s	RIL85	1	1.12773	0.887799	0.622292	0.267439	0.034833	37.4457	18.8819	0.495752
RIL84_1_1wkf_10x9300_30	RIL84	1	2.07142	0.502109	0.242206	0.260402	0.346284	53.6966	33.9078	0.368529
RIL84_2_1wkf_10x9300_30	RIL84	1	1.21822	1.02473	0.797861	0.247265	1.27785	54.8647	29.5528	0.461351
RIL84_3_1wkf_10x9300_30	RIL84	1	1.63655	0.61384	0.424177	0.194065	0.0593198	74.4106	48.1272	0.353221
RIL84_4_1wkf_10x9300_30	RIL84	1	1.69846	0.658473	0.237212	0.421261	0.501277	62.4999	31.8895	0.489768
RIL84_5_1wkf_10x9300_30	RIL84	1	1.23964	1.08894	0.867388	0.24929	0.58537	62.4329	38.3455	0.385813
RIL84_6_1wkf_10x9300_30	RIL84	1	1.52366	0.720884	0.484873	0.237726	0.247653	78.784	41.5788	0.472243
RIL84_7_1wkf_10x9300_30	RIL84	1	2.19668	0.49498	0.257082	0.241267	0.344547	54.7009	35.0187	0.359816
RIL84_8_1wkf_10x9300_30	RIL84	1	1.25698	0.822933	0.603392	0.232344	0.153255	63.5252	36.112	0.431533
RIL84_9_1wkf_10x9300_30	RIL84	1	1.43295	0.713151	0.4915	0.223252	0.153991	47.0461	31.7202	0.325764
RIL83_9_1wkf_EM10x1_30s	RIL83	1	2.353	0.425253	0.215779	0.209142	0.0249859	40.6034	17.5008	0.568982
RIL83_11_1wkf_EM10x1_30s	RIL83	1	2.64177	0.378788	0.16742	0.211174	0.0269448	53.8745	31.7391	0.410871
RIL83_6_1wkf_EM10x1_30s	RIL83	1	1.89075	0.532693	0.337896	0.194796	0.0891565	23.0737	14.3867	0.376491
RIL83_5_1wkf_EM10x1_30s	RIL83	1	0.988662	1.18104	0.90722	0.303987	0.335584	51.4086	24.0636	0.531915
RIL83_4_1wkf_EM10x1_30s	RIL83	1	1.27883	0.79035	0.54637	0.250785	0.0998365	52.6844	25.1812	0.522037
RIL83_3_1wkf_EM10x1_30s	RIL83	1	2.29591	0.439037	0.22869	0.21355	0.0689077	32.8322	19.7188	0.399408
RIL83_1_1wkf_EM10x1_30s	RIL83	1	1.06341	0.960336	0.705225	0.271587	0.111214	30.9373	22.1207	0.284983
RIL83_10_1wkf_EM10x1_30s	RIL83	1	1.15066	0.895641	0.660497	0.252076	0.123478	41.5644	27.3669	0.341579
RIL83_8_1wkf_EM10x1_30s	RIL83	1	2.15938	0.463392	0.268573	0.19482	0.0255721	29.5326	19.6884	0.333333
RIL83_2_1wkf_EM10x1_30s	RIL83	1	2.04296	0.70634	0.445816	0.267759	1.48167	41.5644	24.0884	0.420455
RIL83_7_1wkf_EM10x1_30s	RIL83	1	1.74119	0.575381	0.352031	0.225585	0.0422884	36.112	19.7188	0.453955
RIL82_02_1wkf_EM10x1_30s	RIL82	1	1.78289	0.693733	0.409367	0.273567	0.839641	64.0816	31.289	0.511731
RIL82_04_1wkf_EM10x1_30s	RIL82	1	1.4239	0.724125	0.487673	0.247814	0.110533	71.892	40.625	0.434916
RIL82_07_1wkf_EM10x1_30s	RIL82	1	2.27452	0.443704	0.233545	0.210159	0.0933797	56.5962	31.4059	0.445088
RIL82_03_1wkf_EM10x1_30s	RIL82	1	0.598818	1.79911	1.61379	0.249299	0.225501	65.625	31.25	0.52381
RIL82_06_1wkf_EM10x1_30s	RIL82	1	1.57969	0.639235	0.380406	0.264976	0.0774983	40.8945	25.4357	0.378018
RIL82_08_1wkf_EM10x1_30s	RIL82	1	0.988442	1.08037	0.869086	0.211282	0.195019	56.25	25.0488	0.554688
RIL82_05_1wkf_EM10x1_30s	RIL82	1	0.713622	1.46416	1.21651	0.247649	0.172021	58.1494	28.2981	0.513355
RIL82_01_1wkf_EM10x1_30s	RIL82	1	1.11972	1.11727	0.883405	0.256988	0.948117	53.3314	26.5625	0.501935
RIL81_9_1wkf_EM10x1_30s	RIL81	1	1.95782	0.511882	0.307429	0.205702	0.0462777	42.7143	26.2512	0.385423
RIL81_7_1wkf_EM10x1_30s	RIL81	1	0.705746	1.5862	1.463	0.191465	0.198976	43.752	28.4388	0.35
RIL81_3_1wkf_EM10x1_30s	RIL81	1	1.26551	0.790571	0.546959	0.243612	0.0218438	30.6264	18.5946	0.392857
RIL81_1_1wkf_EM10x1_30s	RIL81	1	1.52464	0.657954	0.41706	0.245166	0.0491244	38.4234	21.9033	0.429948
RIL81_2_1wkf_EM10x1_30s	RIL81	1	1.69387	0.596633	0.381343	0.2176	0.093714	44.8591	26.3422	0.41278
RIL81_5_1wkf_EM10x1_30s	RIL81	1	1.08727	0.927736	0.721282	0.206454	0.0836664	45.9917	29.6135	0.356111
RIL81_4_1wkf_EM10x1_30s	RIL81	1	1.11559	1.08982	0.837286	0.23575	0.508145	45.9396	24.0884	0.47565
RIL81_6_1wkf_EM10x1_30s	RIL81	1	2.33989	0.431955	0.250433	0.181272	0.107251	44.0925	25.1812	0.428901
RIL81_8_1wkf_EM10x1_30s	RIL81	1	1.72116	0.591753	0.429269	0.164136	0.110255	38.3455	26.2512	0.315403
RIL80_10_1wkf_EM10x1_30s	RIL80	1	1.16172	0.864974	0.591586	0.280109	0.0647549	48.4627	28.1684	0.418762
RIL80_11_1wkf_EM10x1_30s	RIL80	1	2.15513	0.466368	0.2487	0.220771	0.0597512	34.4105	20.5515	0.402755
RIL80_1_1wkf_EM10x1_30s	RIL80	1	1.57578	0.635686	0.375827	0.262894	0.0410477	43.7779	28.1684	0.356562
RIL80_2_1wkf_EM10x1_30s	RIL80	1	1.24321	0.816919	0.525861	0.303339	0.114224	40.655	25.0488	0.38387
RIL80_3_1wkf_EM10x1_30s	RIL80	1	1.47455	0.678737	0.396849	0.281888	0.0317655	51.5862	28.1684	0.453955
RIL80_4_1wkf_EM10x1_30s	RIL80	1	1.24732	0.80218	0.518574	0.283165	0.025697	65.7922	37.5325	0.429529
RIL80_5_1wkf_EM10x1_30s	RIL80	1	1.82991	0.548751	0.309852	0.242568	0.0573303	58.1494	29.7286	0.488755
RIL80_6_1wkf_EM10x1_30s	RIL80	1	1.12977	0.892032	0.640619	0.261516	0.0725808	53.148	23.4375	0.559014
RIL80_7_1wkf_EM10x1_30s	RIL80	1	1.94934	0.515949	0.280267	0.239602	0.0661321	51.5862	23.4375	0.545663
RIL80_8_1wkf_EM10x1_30s	RIL80	1	1.1924	0.973787	0.739186	0.234602	0.441499	57.8336	39.0937	0.324031
RIL80_9_1wkf_EM10x1_30s	RIL80	1	1.16533	0.870724	0.621827	0.248897	0.114445	54.888	25.0488	0.543639
RIL8_06_1wkf_EM10x1_30s	RIL8	1	1.08989	0.929369	0.71791	0.225287	0.0873993	51.5625	28.125	0.454545
RIL8_08_1wkf_EM10x1_30s	RIL8	1	0.855753	1.34621	1.11931	0.226903	0.283087	70.4686	43.8615	0.377574
RIL8_02_1wkf_EM10x1_30s	RIL8	1	0.780848	1.28283	1.02925	0.253581	0.0402834	58.0022	34.5168	0.404906
RIL8_07_1wkf_EM10x1_30s	RIL8	1	1.25066	0.802683	0.572028	0.239204	0.0545634	50	29.7286	0.405428
RIL8_03_1wkf_EM10x1_30s	RIL8	1	1.23831	0.824146	0.609872	0.223269	0.119768	65.6994	34.375	0.476783
RIL8_09_1wkf_EM10x1_30s	RIL8	1	0.91072	1.92708	1.58051	0.346566	1.17672	70.3299	35.9375	0.489015
RIL8_10_1wkf_EM10x1_30s	RIL8	1	1.79233	0.5615	0.407071	0.1575	0.0689404	62.5195	37.5	0.400187
RIL8_01_1wkf_EM10x1_30s	RIL8	1	1.39849	0.742726	0.513786	0.236684	0.210708	56.25	29.7286	0.471492
RIL8_04_1wkf_EM10x1_30s	RIL8	1	2.16411	0.469651	0.252688	0.21919	0.152104	59.375	32.8497	0.446742
RIL8_05_1wkf_EM10x1_30s	RIL8	1	1.1788	0.882433	0.708937	0.186692	0.152774	34.4105	17.1875	0.500516
RIL8_11_1wkf_EM10x1_30s	RIL8	1	1.64319	0.652527	0.482608	0.178821	0.220129	70.9347	45.3394	0.360829
RIL79_10_1wkf_EM10x1_30s	RIL79	1	1.80576	0.554889	0.293517	0.26348	0.0428934	42.1875	20.3725	0.517096
RIL79_1_1wkf_EM10x1_30s	RIL79	1	1.41225	0.711847	0.472747	0.242506	0.0708163	35.9715	25.0488	0.303648
RIL79_2_1wkf_EM10x1_30s	RIL79	1	1.33089	0.751932	0.500571	0.251361	0.0271789	45.3394	23.4375	0.483066
RIL79_3_1wkf_EM10x1_30s	RIL79	1	1.18478	0.888646	0.610073	0.287751	0.223843	65.6994	35.9715	0.452484
RIL79_4_1wkf_EM10x1_30s	RIL79	1	0.723077	1.40043	1.12135	0.281948	0.112546	47.1088	29.6875	0.36981
RIL79_5_1wkf_EM10x1_30s	RIL79	1	1.0884	0.925144	0.656779	0.27667	0.0791882	37.7918	21.875	0.421171
RIL79_6_1wkf_EM10x1_30s	RIL79	1	1.3278	0.75408	0.510597	0.243483	0.0355866	35.9715	21.875	0.391879
RIL79_7_1wkf_EM10x1_30s	RIL79	1	1.27158	0.80761	0.503496	0.304114	0.15496	44.4421	28.1684	0.366178
RIL79_8_1wkf_EM10x1_30s	RIL79	1	1.16813	0.881029	0.635381	0.257285	0.178109	43.7779	25.0488	0.427821
RIL79_9_1wkf_EM10x1_30s	RIL79	1	1.84862	0.545648	0.314974	0.230674	0.0925445	52.4078	28.1684	0.462516
RIL76_10_1wkf_EM10x1_30s	RIL76	1	0.853239	1.22158	0.993183	0.259989	0.149824	34.4105	20.3125	0.4097
RIL76_11_1wkf_EM10x1_30s	RIL76	1	1.23595	0.815782	0.554438	0.271059	0.0729341	56.2717	32.8497	0.416231
RIL76_1_1wkf_EM10x1_30s	RIL76	1	0.847365	1.21753	0.98079	0.23674	0.177463	39.0937	23.4375	0.400479
RIL76_2_1wkf_EM10x1_30s	RIL76	1	0.818456	1.23406	0.973881	0.256316	0.0951403	48.5382	29.6875	0.388368
RIL76_3_1wkf_EM10x1_30s	RIL76	1	1.86699	0.537775	0.326698	0.21363	0.058363	29.8515	20.3725	0.317539
RIL76_4_1wkf_EM10x1_30s	RIL76	1	0.87534	1.44437	1.1632	0.32199	0.256006	61.0176	32.8125	0.462245
RIL76_5_1wkf_EM10x1_30s	RIL76	1	1.10337	1.96293	1.66426	0.298671	3.43723	53.2168	35.9375	0.324697
RIL76_6_1wkf_EM10x1_30s	RIL76	1	1.26564	0.817946	0.620469	0.206761	0.157293	48.4627	26.5625	0.451898
RIL76_7_1wkf_EM10x1_30s	RIL76	1	0.611904	1.65216	1.38838	0.273777	0.113599	38.0173	20.3125	0.465703
RIL76_8_1wkf_EM10x1_30s	RIL76	1	1.12563	0.891012	0.661692	0.229319	0.0563078	62.5781	45.3394	0.275474
RIL76_9_1wkf_EM10x1_30s	RIL76	1	1.69673	0.590528	0.399374	0.192418	0.0449564	47.1088	26.6084	0.435171
RIL74_09_1wkf_EM10x1_30s	RIL74	1	1.20741	0.835216	0.649688	0.191858	0.0799644	40.625	28.1684	0.306625
RIL74_12_1wkf_EM10x1_30s	RIL74	1	2.08927	0.486531	0.27303	0.213635	0.123877	58.0022	31.289	0.460554
RIL74_06_1wkf_EM10x1_30s	RIL74	1	1.4278	0.81906	0.622553	0.2138	0.14706	60.9575	40.625	0.333552
RIL74_04_1wkf_EM10x1_30s	RIL74	1	0.748142	1.40166	1.16369	0.278369	0.15936	46.901	37.5325	0.19975
RIL74_02_1wkf_EM10x1_30s	RIL74	1	1.13926	0.883977	0.674486	0.220216	0.0687411	56.25	31.289	0.44375
RIL74_10_1wkf_EM10x1_30s	RIL74	1	0.807321	1.26479	1.05648	0.231236	0.126179	53.3314	37.5325	0.296239
RIL74_01_1wkf_EM10x1_30s	RIL74	1	1.61587	0.641663	0.446407	0.204708	0.131431	57.8969	31.289	0.459573
RIL74_05_1wkf_EM10x1_30s	RIL74	1	2.38836	0.418849	0.246906	0.171943	0.020221	72.2983	34.4105	0.524049
RIL74_07_1wkf_EM10x1_30s	RIL74	1	2.02921	0.492909	0.251745	0.241164	0.0158805	54.7767	31.25	0.429502
RIL74_03_1wkf_EM10x1_30s	RIL74	1	1.14769	0.884576	0.665877	0.227575	0.124017	58.0022	37.5325	0.352912
RIL74_11_1wkf_EM10x1_30s	RIL74	1	1.34406	0.763825	0.577829	0.185996	0.150347	42.3031	31.4059	0.257599
RIL74_08_1wkf_EM10x1_30s	RIL74	1	1.75011	0.6768	0.424756	0.25454	0.320968	62.5	34.4105	0.449432
RIL73_10_1wkf_EM10x1_30s	RIL73	1	2.08652	0.480654	0.302703	0.180198	0.0484748	56.3367	35.9715	0.361492
RIL73_05_1wkf_EM10x1_30s	RIL73	1	0.874933	1.15869	0.880511	0.274112	0.115536	64.1387	35.9715	0.439161
RIL73_02_1wkf_EM10x1_30s	RIL73	1	1.63709	0.711219	0.47015	0.252263	0.14418	72.0277	34.375	0.522753
RIL73_04_1wkf_EM10x1_30s	RIL73	1	3.26751	0.306182	0.141951	0.164526	0.0216547	73.4541	45.4201	0.381653
RIL73_09_1wkf_EM10x1_30s	RIL73	1	2.13895	0.468682	0.288384	0.182849	0.0439515	64.3667	31.25	0.5145
RIL73_01_1wkf_EM10x1_30s	RIL73	1	2.25713	0.4639	0.248592	0.218348	0.265901	68.821	34.5168	0.498456
RIL73_03_1wkf_EM10x1_30s	RIL73	1	1.67827	0.596213	0.327969	0.269096	0.0246259	40.745	28.125	0.309732
RIL73_12_1wkf_EM10x1_30s	RIL73	1	2.12904	0.474428	0.244546	0.231156	0.0911873	54.7098	42.2164	0.228357
RIL73_06_1wkf_EM10x1_30s	RIL73	1	1.38072	0.7545	0.555651	0.211492	0.144378	53.148	26.7457	0.496769
RIL73_07_1wkf_EM10x1_30s	RIL73	1	2.49956	0.400911	0.217185	0.183725	0.0419085	75.26	34.4105	0.542778
RIL73_08_1wkf_EM10x1_30s	RIL73	1	1.56344	0.656813	0.438113	0.224358	0.156308	67.2601	37.5325	0.441979
RIL73_11_1wkf_EM10x1_30s	RIL73	1	0.584982	1.71887	1.46574	0.253128	0.0784854	75.26	42.4471	0.435993
RIL72_10_1wkf_10x9300_30	RIL72	1	1.50924	0.663696	0.409697	0.253002	0.0417215	67.8244	39.3768	0.41943
RIL72_1_1wkf_10x9300_30	RIL72	1	2.10269	0.476132	0.278924	0.197017	0.0335206	75.4801	39.392	0.478114
RIL72_2_1wkf_10x9300_30	RIL72	1	1.81164	0.556745	0.299975	0.259761	0.0981626	84.251	47.0334	0.441747
RIL72_3_1wkf_10x9300_30	RIL72	1	1.19373	1.07029	0.656565	0.430885	0.64702	72.2239	33.9254	0.530274
RIL72_4_1wkf_10x9300_30	RIL72	1	0.971159	1.03403	0.730581	0.30831	0.062248	66.7218	33.9783	0.490747
RIL72_5_1wkf_10x9300_30	RIL72	1	1.14853	0.889966	0.608926	0.287065	0.138367	66.8024	32.8322	0.508518
RIL72_6_1wkf_10x9300_30	RIL72	1	1.63579	0.613984	0.356144	0.259611	0.0655444	65.628	39.3768	0.4
RIL72_7_1wkf_10x9300_30	RIL72	1	1.39896	0.715234	0.458893	0.25634	0.0248046	63.4498	29.5326	0.534552
RIL72_8_1wkf_10x9300_30	RIL72	1	2.09763	0.478248	0.218106	0.262541	0.0488552	63.4404	37.3337	0.411516
RIL72_9_1wkf_10x9300_30	RIL72	1	1.42934	0.966909	0.72691	0.310817	1.27663	75.5039	37.2053	0.50724
RIL71_01_1wkf_EM10x1_30s	RIL71	1	1.4089	0.712254	0.417088	0.296267	0.0606863	55.7838	30.7044	0.449582
RIL71_02_1wkf_EM10x1_30s	RIL71	1	2.14537	0.467158	0.279955	0.186962	0.0469139	60.2484	35.0187	0.418762
RIL71_03_1wkf_EM10x1_30s	RIL71	1	1.56949	0.801625	0.526278	0.266268	0.673388	79.8774	46.1475	0.422271
RIL71_04_1wkf_EM10x1_30s	RIL71	1	3.38607	0.324597	0.114531	0.209825	0.888422	55.7945	30.6459	0.450736
RIL71_05_1wkf_EM10x1_30s	RIL71	1	1.58887	0.67357	0.465963	0.207608	0.208604	73.358	45.9396	0.373762
RIL71_06_1wkf_EM10x1_30s	RIL71	1	2.05203	0.489973	0.307428	0.181862	0.0704419	63.4781	41.5788	0.34499
RIL71_07_1wkf_EM10x1_30s	RIL71	1	1.6334	1.15777	0.835078	0.349402	0.613978	62.385	32.814	0.474008
RIL71_08_1wkf_EM10x1_30s	RIL71	1	3.53015	0.324916	0.122058	0.204465	0.784867	59.3179	36.1616	0.390375
RIL70_02_1wkf_EM10x1_30s	RIL70	1	1.70378	0.593772	0.417584	0.178023	0.0947069	62.6755	39.0937	0.376252
RIL70_08_1wkf_EM10x1_30s	RIL70	1	1.19206	0.842475	0.6651	0.17979	0.0662863	32.8497	18.815	0.42724
RIL70_07_1wkf_EM10x1_30s	RIL70	1	1.35367	0.741717	0.560309	0.181933	0.0616368	56.2717	34.375	0.389125
RIL70_05_1wkf_EM10x1_30s	RIL70	1	1.683	0.595375	0.406187	0.189188	0.0424093	66.0884	40.745	0.383477
RIL70_06_1wkf_EM10x1_30s	RIL70	1	1.02926	0.986931	0.813366	0.186753	0.113667	42.2164	25.1946	0.403205
RIL70_03_1wkf_EM10x1_30s	RIL70	1	1.01978	1.0625	0.845799	0.234891	0.280174	68.7678	45.3394	0.340688
RIL70_04_1wkf_EM10x1_30s	RIL70	1	1.80503	0.583123	0.374725	0.213537	0.202284	36.0731	25.0488	0.305611
RIL70_01_1wkf_EM10x1_30s	RIL70	1	0.755034	1.33061	1.1179	0.229313	0.0608585	56.2717	36.2419	0.355948
RIL69_07_1wkf_EM10x1_30s	RIL69	1	1.44924	0.714453	0.531647	0.190655	0.133273	70.5897	56.445	0.20038
RIL69_06_1wkf_EM10x1_30s	RIL69	1	1.07074	0.961509	0.791214	0.17234	0.129727	73.703	43.75	0.406401
RIL69_03_1wkf_EM10x1_30s	RIL69	1	0.702479	1.43619	1.21952	0.231373	0.089836	59.375	37.5325	0.367873
RIL69_09_1wkf_EM10x1_30s	RIL69	1	0.924972	1.20191	0.96932	0.241447	0.246639	62.5195	37.63	0.398108
RIL69_05_1wkf_EM10x1_30s	RIL69	1	1.19929	1.01184	0.742236	0.265773	0.364199	56.3367	31.25	0.4453
RIL69_04_1wkf_EM10x1_30s	RIL69	1	1.22247	0.823855	0.571543	0.252921	0.0823876	68.821	40.655	0.409264
RIL69_02_1wkf_EM10x1_30s	RIL69	1	1.57939	0.633849	0.417586	0.219497	0.0334178	71.9429	39.0937	0.4566
RIL69_10_1wkf_EM10x1_30s	RIL69	1	1.70932	0.60321	0.422478	0.188908	0.130392	76.6262	53.2168	0.305501
RIL69_08_1wkf_EM10x1_30s	RIL69	1	0.956473	1.09848	0.893913	0.219568	0.153365	54.7767	32.8497	0.400298
RIL69_01_1wkf_EM10x1_30s	RIL69	1	1.41185	0.712484	0.502845	0.20901	0.0776302	62.5195	46.901	0.249818
RIL69_12_1wkf_EM10x1_30s	RIL69	1	1.26576	0.866039	0.661565	0.223299	0.233333	76.7059	57.8969	0.245209
RIL69_11_1wkf_EM10x1_30s	RIL69	1	1.46818	0.70546	0.493404	0.223771	0.109519	43.7779	23.4895	0.463439
RIL68_12_1wkf_EM10x1_30s	RIL68	1	1.32442	0.757316	0.563905	0.19341	0.0537537	53.3314	29.7286	0.442569
RIL68_9_1wkf_EM10x1_30s	RIL68	1	1.84948	0.551678	0.343638	0.214403	0.0885095	48.5382	26.5625	0.452751
RIL68_2_1wkf_EM10x1_30s	RIL68	1	1.08579	0.985258	0.779226	0.2247	0.265416	51.5862	25.0488	0.514428
RIL68_10_1wkf_EM10x1_30s	RIL68	1	1.10019	0.90932	0.711062	0.196654	0.021049	61.1175	29.6875	0.514256
RIL68_5_1wkf_EM10x1_30s	RIL68	1	0.911018	1.14087	0.881693	0.259172	0.198471	53.2168	31.25	0.41278
RIL68_4_1wkf_EM10x1_30s	RIL68	1	1.53071	0.653912	0.443615	0.210381	0.0308139	57.8125	31.289	0.458784
RIL68_6_1wkf_EM10x1_30s	RIL68	1	1.51705	0.659759	0.454435	0.205463	0.0297798	56.3367	25.0488	0.555374
RIL68_8_1wkf_EM10x1_30s	RIL68	1	1.57578	0.636138	0.444998	0.19531	0.0455099	43.8615	25	0.430024
RIL68_3_1wkf_EM10x1_30s	RIL68	1	0.613089	1.68732	1.49962	0.231032	0.174833	45.3394	29.7286	0.34431
RIL68_11_1wkf_EM10x1_30s	RIL68	1	2.3158	0.44297	0.231183	0.214612	0.192142	70.3299	32.8497	0.53292
RIL68_1_1wkf_EM10x1_30s	RIL68	1	1.62931	0.614187	0.410654	0.201818	0.0286242	54.7767	32.8497	0.400298
RIL68_7_1wkf_EM10x1_30s	RIL68	1	1.4336	0.710981	0.530919	0.189778	0.0948	70.3299	43.75	0.377931
RIL66_03_1wkf_EM10x1_30s	RIL66	1	2.61084	0.392393	0.174375	0.219888	0.0906587	56.25	35.9375	0.361111
RIL66_05_1wkf_EM10x1_30s	RIL66	1	1.27176	0.788429	0.530526	0.262791	0.0500802	55.0435	33.1456	0.397828
RIL66_01_1wkf_EM10x1_30s	RIL66	1	0.815226	1.23196	0.988926	0.252897	0.0636299	51.7751	26.5625	0.486964
RIL66_06_1wkf_EM10x1_30s	RIL66	1	1.46187	0.818211	0.581429	0.229495	0.333808	59.375	31.289	0.473027
RIL66_04_1wkf_EM10x1_30s	RIL66	1	0.9713	1.22437	0.970393	0.279961	0.350909	48.6638	31.25	0.357839
RIL66_02_1wkf_EM10x1_30s	RIL66	1	1.84262	0.596825	0.241843	0.359184	0.388208	53.125	25.0488	0.528494
RIL66_07_1wkf_EM10x1_30s	RIL66	1	2.81653	0.36426	0.172516	0.192119	0.162882	57.8969	32.961	0.430695
RIL66_03_1wkf_EM10x1_30s	RIL66	1	1.20872	0.851077	0.660268	0.191396	0.125474	53.3314	39.1873	0.265211
RIL66_05_1wkf_EM10x1_30s	RIL66	1	1.31323	0.762576	0.57158	0.192595	0.0377209	54.7098	40.655	0.256897
RIL66_01_1wkf_EM10x1_30s	RIL66	1	1.51889	0.67774	0.495568	0.187631	0.189036	48.4627	34.4105	0.289959
RIL66_04_1wkf_EM10x1_30s	RIL66	1	2.37535	0.445849	0.269703	0.180149	0.277276	79.8252	53.2168	0.333333
RIL66_02_1wkf_EM10x1_30s	RIL66	1	1.80388	0.554775	0.386189	0.168587	0.0273647	48.5382	37.5325	0.226742
RIL65_01_1wkf_EM10x1_30s	RIL65	1	1.46688	0.682504	0.505093	0.177411	0.0343184	56.9722	32.814	0.424035
RIL65_02_1wkf_EM10x1_30s	RIL65	1	1.53816	0.654559	0.403341	0.25614	0.0704038	52.6048	29.5326	0.438595
RIL65_03_1wkf_EM10x1_30s	RIL65	1	2.65136	0.37733	0.192883	0.184447	0.0209237	74.3864	48.1272	0.353011
RIL65_04_1wkf_EM10x1_30s	RIL65	1	1.56231	0.640503	0.472494	0.168009	0.0257331	51.4551	35.4263	0.311511
RIL65_05_1wkf_EM10x1_30s	RIL65	1	2.26115	0.444997	0.269644	0.177788	0.0684309	63.5911	38.283	0.397982
RIL65_06_1wkf_EM10x1_30s	RIL65	1	2.08517	0.481126	0.289497	0.19377	0.0511088	51.4086	25.1812	0.510176
RIL65_07_1wkf_EM10x1_30s	RIL65	1	1.61681	0.646307	0.46849	0.182576	0.181188	57.255	33.9254	0.407467
RIL65_04_1wkf_EM10x1_30s	RIL65	1	1.88223	0.537587	0.363719	0.178242	0.0996242	37.5	23.4375	0.375
RIL65_02_1wkf_EM10x1_30s	RIL65	1	1.64794	0.665493	0.350955	0.316481	0.365238	43.8615	25.0488	0.428911
RIL65_05_1wkf_EM10x1_30s	RIL65	1	0.979228	1.03605	0.846519	0.198895	0.114862	40.625	31.289	0.229808
RIL65_01_1wkf_EM10x1_30s	RIL65	1	1.54316	0.664073	0.462137	0.211041	0.107535	46.875	31.289	0.332501
RIL65_03_1wkf_EM10x1_30s	RIL65	1	2.08631	0.516244	0.315146	0.206582	0.113338	18.815	14.0625	0.252591
RIL64_6_1wkf_EM10x1_30s	RIL64	1	1.70789	0.58769	0.376889	0.212879	0.0587732	21.9033	13.1256	0.400749
RIL64_1_1wkf_EM10x1_30s	RIL64	1	1.33888	1.05797	0.808126	0.249848	1.47861	42.6722	21.9033	0.486708
RIL64_9_1wkf_EM10x1_30s	RIL64	1	1.10722	0.99641	0.777235	0.219175	0.352855	24.2863	16.407	0.324434
RIL64_7_1wkf_EM10x1_30s	RIL64	1	1.45982	0.696003	0.514216	0.184414	0.116878	49.221	20.811	0.577193
RIL64_10_1wkf_EM10x1_30s	RIL64	1	1.94895	0.518233	0.350948	0.17022	0.0837579	27.3669	14.2614	0.478881
RIL64_4_1wkf_EM10x1_30s	RIL64	1	1.0668	1.0217	0.818527	0.226455	0.224443	35.0016	19.6884	0.4375
RIL64_3_1wkf_EM10x1_30s	RIL64	1	1.14302	0.912194	0.6828	0.229394	0.147949	31.8895	15.3132	0.519804
RIL64_5_1wkf_EM10x1_30s	RIL64	1	0.840586	1.56866	1.41076	0.233908	0.325916	22.1207	13.3067	0.398454
RIL64_8_1wkf_EM10x1_30s	RIL64	1	0.677206	2.30211	2.05817	0.243948	1.61969	36.6872	18.8819	0.485326
RIL63_02_1wkf_EM10x1_30s	RIL63	1	1.58069	0.633414	0.443205	0.190209	0.0360654	39.0625	20.3125	0.48
RIL63_03_1wkf_EM10x1_30s	RIL63	1	1.51868	0.661094	0.438629	0.224981	0.0572692	50	26.6084	0.467832
RIL63_07_1wkf_EM10x1_30s	RIL63	1	1.675	0.629754	0.423084	0.211092	0.190767	37.7918	21.875	0.421171
RIL63_08_1wkf_EM10x1_30s	RIL63	1	2.9013	0.344864	0.154807	0.190327	0.0235403	47.2898	26.5625	0.438304
RIL63_05_1wkf_EM10x1_30s	RIL63	1	0.829334	1.21841	1.03507	0.202758	0.0857716	56.3367	39.0625	0.306625
RIL63_06_1wkf_EM10x1_30s	RIL63	1	1.13058	0.897828	0.739308	0.172265	0.0901183	53.148	31.25	0.412019
RIL63_01_1wkf_EM10x1_30s	RIL63	1	1.0224	1.04326	0.817276	0.250353	0.185325	43.75	32.961	0.246606
RIL63_04_1wkf_EM10x1_30s	RIL63	1	0.979908	1.17006	1.00685	0.20307	0.167335	43.7779	29.7286	0.320922
RIL62_2_1wkf_EM10x1_30s	RIL62	1	2.05548	0.486894	0.290277	0.196434	0.0387081	37.3337	17.637	0.527585
RIL62_8_1wkf_EM10x1_30s	RIL62	1	1.14561	0.898088	0.716551	0.199865	0.112242	38.5322	24.0884	0.374849
RIL62_4_1wkf_EM10x1_30s	RIL62	1	2.29292	0.439776	0.260947	0.178829	0.122408	41.6937	22.9958	0.448458
RIL62_3_1wkf_EM10x1_30s	RIL62	1	4.13745	0.252315	0.215004	0.0381936	0.319938	42.6582	29.5326	0.307692
RIL62_10_1wkf_EM10x1_30s	RIL62	1	2.88435	0.347304	0.238395	0.109414	0.0564356	39.3768	22.9958	0.416006
RIL62_12_1wkf_EM10x1_30s	RIL62	1	1.37861	0.799852	0.605377	0.197829	0.44197	40.6034	28.5228	0.297527
RIL62_1_1wkf_EM10x1_30s	RIL62	1	1.19078	0.843043	0.650092	0.194369	0.0635131	34.1889	19.7188	0.423241
RIL62_5_1wkf_EM10x1_30s	RIL62	1	1.42575	0.708439	0.521113	0.196183	0.0801408	48.1769	26.274	0.454635
RIL62_11_1wkf_EM10x1_30s	RIL62	1	1.98052	0.508498	0.288108	0.224395	0.0668604	49.2696	31.7202	0.356191
RIL62_6_1wkf_EM10x1_30s	RIL62	1	2.45301	0.413819	0.234052	0.179767	0.185327	49.4151	25.535	0.483254
RIL61_7_1wkf_EM10x1_30s	RIL61	1	1.67583	0.61173	0.452205	0.167766	0.0966486	36.0954	25.1812	0.302372
RIL61_6_1wkf_EM10x1_30s	RIL61	1	0.853321	1.19122	1.02795	0.185654	0.0985157	39.4375	14.5931	0.629969
RIL61_4_1wkf_EM10x1_30s	RIL61	1	0.941644	1.08155	0.86278	0.226235	0.129158	43.8067	26.274	0.400229
RIL61_10_1wkf_EM10x1_30s	RIL61	1	0.796463	1.34767	1.19	0.198306	0.2045	50.3267	28.5228	0.433247
RIL61_9_1wkf_EM10x1_30s	RIL61	1	1.61974	0.618302	0.440365	0.179062	0.0381558	35.0699	17.5349	0.5
RIL61_8_1wkf_EM10x1_30s	RIL61	1	0.818726	1.25678	1.07553	0.181252	0.122722	39.392	18.6267	0.527144
RIL61_12_1wkf_EM10x1_30s	RIL61	1	1.53596	0.656365	0.493063	0.169949	0.068645	48.3257	28.4598	0.411083
RIL61_1_1wkf_EM10x1_30s	RIL61	1	0.867533	1.17126	0.949228	0.222035	0.114753	59.0753	33.9254	0.425726
RIL61_2_1wkf_EM10x1_30s	RIL61	1	0.981027	1.02293	0.818726	0.206247	0.0582606	47.0461	26.2512	0.442011
RIL61_11_1wkf_EM10x1_30s	RIL61	1	1.27255	0.786731	0.606052	0.180235	0.0342126	61.4089	34.0662	0.445256
RIL61_3_1wkf_EM10x1_30s	RIL61	1	2.48692	0.404176	0.218133	0.185986	0.0801954	36.0954	20.7822	0.424242
RIL61_5_1wkf_EM10x1_30s	RIL61	1	1.97246	0.507145	0.356063	0.151067	0.0180629	45.9917	24.0636	0.476783
RIL60_2_1wkf_10x9300_30	RIL60	1	2.58891	0.417728	0.248178	0.171291	0.544899	35.1551	19.6884	0.439956
RIL60_3_1wkf_10x9300_30	RIL60	1	1.89422	0.562647	0.377775	0.191689	0.267623	52.5024	30.6264	0.416667
RIL60_5_1wkf_10x9300_30	RIL60	1	2.01439	0.502382	0.310343	0.192051	0.1361	50.5047	28.4598	0.436491
RIL60_4_1wkf_10x9300_30	RIL60	1	1.52523	0.725126	0.557975	0.175757	0.456087	58.0642	31.7391	0.45338
RIL60_8_1wkf_10x9300_30	RIL60	1	1.93033	0.525599	0.343889	0.185861	0.135442	51.4202	29.7143	0.422127
RIL60_7_1wkf_10x9300_30	RIL60	1	1.89581	0.533688	0.347176	0.187578	0.150936	51.8258	33.9783	0.344375
RIL60_1_1wkf_10x9300_30	RIL60	1	0.66589	1.61088	1.41707	0.216145	0.352292	36.0954	24.0636	0.333333
RIL60_04_1wkf_EM10x1_30s	RIL60	1	2.60571	0.38518	0.210492	0.176515	0.0490376	40.4854	24.0884	0.405009
RIL60_05_1wkf_EM10x1_30s	RIL60	1	3.43736	0.291057	0.135356	0.155768	0.024085	47.0461	30.6459	0.348598
RIL60_01_1wkf_EM10x1_30s	RIL60	1	2.11452	0.474441	0.322707	0.152037	0.056563	52.5138	27.3669	0.478863
RIL60_02_1wkf_EM10x1_30s	RIL60	1	1.69819	0.592554	0.437525	0.157675	0.0689428	45.9396	31.7391	0.309113
RIL60_03_1wkf_EM10x1_30s	RIL60	1	2.31977	0.44025	0.297281	0.146124	0.125954	32.8322	27.345	0.167129
RIL60_06_1wkf_EM10x1_30s	RIL60	1	1.78359	0.565491	0.405497	0.165813	0.0723069	37.2053	24.0636	0.353221
RIL6_11_1wkf_EM10x1_30s	RIL6	1	1.72037	0.583659	0.409225	0.174517	0.064715	45.3125	34.4105	0.240596
RIL6_04_1wkf_EM10x1_30s	RIL6	1	1.78506	0.563899	0.35631	0.211789	0.0696563	62.5	32.8125	0.475
RIL6_08_1wkf_EM10x1_30s	RIL6	1	1.37281	0.740478	0.543243	0.197235	0.100795	59.3956	34.375	0.421253
RIL6_06_1wkf_EM10x1_30s	RIL6	1	1.5231	0.665499	0.471437	0.203975	0.0859317	62.5195	39.0937	0.374696
RIL6_01_1wkf_EM10x1_30s	RIL6	1	1.01839	1.16521	0.948315	0.240588	0.300126	46.901	29.6875	0.367018
RIL6_12_1wkf_EM10x1_30s	RIL6	1	2.22024	0.459589	0.297665	0.161924	0.148841	48.5382	36.0731	0.25681
RIL6_05_1wkf_EM10x1_30s	RIL6	1	3.25495	0.307435	0.129624	0.177811	0.0262356	42.2164	20.3725	0.517427
RIL6_03_1wkf_EM10x1_30s	RIL6	1	1.51246	0.662097	0.457042	0.204062	0.037354	50.0244	29.7286	0.405718
RIL6_02_1wkf_EM10x1_30s	RIL6	1	1.72118	0.609401	0.410036	0.199492	0.115482	53.2168	35.9375	0.324697
RIL6_07_1wkf_EM10x1_30s	RIL6	1	2.72572	0.367016	0.212283	0.154733	0.0201465	65.6994	48.5382	0.261207
RIL6_10_1wkf_EM10x1_30s	RIL6	1	1.32636	0.757623	0.573937	0.18847	0.0669534	45.3394	29.7286	0.34431
RIL6_09_1wkf_EM10x1_30s	RIL6	1	1.41514	0.738436	0.550781	0.201121	0.122874	54.7767	37.5	0.315403
RIL59_1_1wkf_10x9300_30	RIL59	1	3.13795	0.358075	0.179601	0.179978	0.577372	24.4581	17.637	0.27889
RIL59_3_1wkf_10x9300_30	RIL59	1	2.84528	0.359501	0.190968	0.168533	0.212598	52.5024	38.283	0.270833
RIL59_8_1wkf_10x9300_30	RIL59	1	2.24989	0.457188	0.286214	0.174771	0.171859	33.9254	20.7822	0.387415
RIL59_7_1wkf_10x9300_30	RIL59	1	1.36173	0.78288	0.520578	0.272645	0.259341	65.4546	31.8895	0.5128
RIL59_2_1wkf_10x9300_30	RIL59	1	2.41059	0.431874	0.238656	0.193218	0.360609	62.4999	36.1616	0.421413
RIL59_5_1wkf_10x9300_30	RIL59	1	2.94167	0.351861	0.208697	0.144552	0.267531	62.586	42.6722	0.318183
RIL59_6_1wkf_10x9300_30	RIL59	1	1.74816	0.587225	0.412279	0.174946	0.221436	66.7308	38.2986	0.426072
RIL59_10_1wkf_10x9300_30	RIL59	1	1.8771	0.544626	0.36724	0.182609	0.158951	48.1272	31.7391	0.340517
RIL59_4_1wkf_10x9300_30	RIL59	1	2.34316	0.441884	0.253942	0.19017	0.289141	44.8591	25.1574	0.439191
RIL57_03_1wkf_EM10x1_30s	RIL57	1	0.576015	1.80095	1.45836	0.328412	0.2126	54.7098	31.25	0.428805
RIL57_04_1wkf_EM10x1_30s	RIL57	1	1.1639	1.1415	0.85582	0.258033	0.435787	35.9715	15.625	0.565628
RIL57_07_1wkf_EM10x1_30s	RIL57	1	1.61026	0.629517	0.41084	0.223508	0.101243	54.6875	35.9715	0.342236
RIL57_02_1wkf_EM10x1_30s	RIL57	1	2.89168	0.356847	0.154692	0.203481	0.220688	31.4059	26.6084	0.152756
RIL57_05_1wkf_EM10x1_30s	RIL57	1	1.45826	0.721662	0.549576	0.184947	0.140615	21.9307	15.625	0.28753
RIL57_06_1wkf_EM10x1_30s	RIL57	1	3.4466	0.291764	0.114831	0.177021	0.100803	25	23.4895	0.060419
RIL57_01_1wkf_EM10x1_30s	RIL57	1	1.77915	0.564692	0.333183	0.235197	0.0599909	42.3031	26.5625	0.372091
RIL57_03_1wkf_EM10x1_30s	RIL57	1	1.69493	0.615568	0.472149	0.153013	0.111444	20.811	14.2614	0.314717
RIL57_04_1wkf_EM10x1_30s	RIL57	1	0.897311	1.15832	0.968062	0.198746	0.167102	29.5528	20.7822	0.296778
RIL57_02_1wkf_EM10x1_30s	RIL57	1	0.741459	1.35778	1.15205	0.217934	0.0798922	33.9254	21.876	0.355174
RIL57_05_1wkf_EM10x1_30s	RIL57	1	1.81052	0.57207	0.4033	0.16877	0.187591	24.0884	16.4434	0.317373
RIL57_01_1wkf_EM10x1_30s	RIL57	1	0.718074	1.59242	1.38024	0.277535	0.239418	30.6459	18.6267	0.392195
RIL56_02_1wkf_EM10x1_30s	RIL56	1	2.64681	0.38809	0.138987	0.24861	0.147106	32.8497	20.3725	0.379826
RIL56_07_1wkf_EM10x1_30s	RIL56	1	0.843089	1.1912	0.925309	0.27607	0.0624317	46.875	25	0.466667
RIL56_09_1wkf_EM10x1_30s	RIL56	1	2.26428	0.458454	0.244069	0.21814	0.140179	35.9715	21.875	0.391879
RIL56_04_1wkf_EM10x1_30s	RIL56	1	1.13475	1.00064	0.70627	0.284894	0.419602	39.0625	26.6084	0.318825
RIL56_05_1wkf_EM10x1_30s	RIL56	1	0.887061	1.14424	0.934173	0.229539	0.0985946	62.5195	44.0004	0.296214
RIL56_01_1wkf_EM10x1_30s	RIL56	1	0.837861	1.31118	1.08891	0.26112	0.233943	51.5862	32.8125	0.363928
RIL56_06_1wkf_EM10x1_30s	RIL56	1	1.75592	0.570136	0.321792	0.248344	0.0333776	32.961	23.4895	0.287353
RIL56_08_1wkf_EM10x1_30s	RIL56	1	1.1549	0.957995	0.705209	0.252786	0.321623	54.888	29.8515	0.456138
RIL56_03_1wkf_EM10x1_30s	RIL56	1	1.20933	0.845373	0.626593	0.22271	0.143784	44.1942	32.8125	0.257538
RIL53_10_1wkf_10x9300_30	RIL53	1	1.18878	1.60392	1.38727	0.257671	3.42944	67.8949	40.4706	0.403923
RIL53_1_1wkf_10x9300_30	RIL53	1	0.495581	3.11951	3.06022	0.350698	0.674758	72.7192	38.5322	0.470123
RIL53_2_1wkf_10x9300_30	RIL53	1	1.74355	0.610484	0.371768	0.245836	0.128903	40.4854	24.0884	0.405009
RIL53_3_1wkf_10x9300_30	RIL53	1	2.17752	0.463101	0.236156	0.230213	0.0704743	56.9722	25.3705	0.554686
RIL53_4_1wkf_10x9300_30	RIL53	1	1.21702	0.980905	0.694773	0.278515	0.305336	88.5978	51.4086	0.419753
RIL53_5_1wkf_10x9300_30	RIL53	1	1.53693	0.829549	0.609203	0.237025	0.292598	61.2919	38.2986	0.375143
RIL53_6_1wkf_10x9300_30	RIL53	1	1.77767	0.577278	0.33642	0.242492	0.170045	81.4128	47.0842	0.421661
RIL53_7_1wkf_10x9300_30	RIL53	1	1.64615	0.625633	0.397807	0.227827	0.165124	73.5779	41.5788	0.434901
RIL53_8_1wkf_10x9300_30	RIL53	1	1.31288	0.840906	0.612685	0.228222	0.290088	64.5435	37.1892	0.423812
RIL53_9_1wkf_10x9300_30	RIL53	1	1.17397	0.950855	0.731488	0.241785	0.221885	71.307	37.2053	0.478238
RIL52_1_1wkf_10x9300_30	RIL52	1	1.04468	0.963534	0.636126	0.327408	0.0800657	55.9551	24.0884	0.569504
RIL52_2_1wkf_10x9300_30	RIL52	1	1.71851	0.637122	0.354982	0.290667	0.279444	60.1689	26.2512	0.563708
RIL52_3_1wkf_10x9300_30	RIL52	1	1.08209	0.9371	0.668779	0.269467	0.100987	38.283	27.345	0.285714
RIL52_4_1wkf_10x9300_30	RIL52	1	0.906182	1.32303	1.01073	0.345663	0.361009	61.4089	28.4388	0.536894
RIL52_5_1wkf_10x9300_30	RIL52	1	1.62074	0.68173	0.411024	0.27696	0.352754	67.8244	31.7955	0.531208
RIL52_6_1wkf_10x9300_30	RIL52	1	1.8211	0.549687	0.308218	0.241469	0.0323432	70.4207	33.9783	0.517495
RIL52_7_1wkf_10x9300_30	RIL52	1	1.66359	0.603402	0.35652	0.246882	0.0605488	50.5047	26.3422	0.478421
RIL52_8_1wkf_10x9300_30	RIL52	1	1.31936	0.826188	0.540889	0.285298	0.234662	83.1935	35.0016	0.579275
RIL52_9_1wkf_10x9300_30	RIL52	1	1.78621	0.561184	0.309886	0.251297	0.0479795	71.1054	28.4598	0.599752
RIL51_01_1wkf_EM10x1_30s	RIL51	1	1.11039	0.928567	0.679311	0.249497	0.16384	62.3562	36.112	0.420876
RIL51_03_1wkf_EM10x1_30s	RIL51	1	2.03667	0.496206	0.297038	0.203632	0.0736313	55.8267	32.9777	0.409285
RIL51_04_1wkf_EM10x1_30s	RIL51	1	2.0816	0.497691	0.285821	0.216918	0.16744	76.9479	45.9917	0.402301
RIL51_05_1wkf_EM10x1_30s	RIL51	1	1.93783	0.516868	0.300788	0.217162	0.0396073	62.4329	42.6722	0.316511
RIL51_06_1wkf_EM10x1_30s	RIL51	1	1.72407	0.645828	0.446258	0.208545	0.181084	66.7308	42.6722	0.360532
RIL51_07_1wkf_EM10x1_30s	RIL51	1	1.4766	0.679023	0.464735	0.217734	0.0471852	50.5047	27.3669	0.458132
RIL51_08_1wkf_EM10x1_30s	RIL51	1	1.41621	0.709222	0.481028	0.233745	0.0566196	49.2696	35.0699	0.288204
RIL51_09_1wkf_EM10x1_30s	RIL51	1	1.54514	0.709187	0.504155	0.205031	0.266909	60.2484	49.2332	0.182831
RIL51_10_1wkf_EM10x1_30s	RIL51	1	2.30048	0.445467	0.232151	0.213094	0.254819	32.8322	20.811	0.366142
RIL51_11_1wkf_EM10x1_30s	RIL51	1	1.80889	0.591434	0.29727	0.293046	0.295876	72.3233	42.7143	0.409398
RIL51_12_1wkf_EM10x1_30s	RIL51	1	1.92057	0.553794	0.273746	0.278694	0.327419	78.9433	51.4551	0.348201
RIL50_04_1wkf_9300_30s	RIL50	1	1.61639	0.618823	0.383009	0.235814	0.0165011	39.5133	26.4555	0.330466
RIL50_02_1wkf_9300_30s	RIL50	1	1.7142	0.586894	0.346422	0.245213	0.0641897	24.2863	15.4687	0.36307
RIL50_10_1wkf_9300_30s	RIL50	1	2.14498	0.467319	0.264874	0.204283	0.0460524	37.3337	20.811	0.442569
RIL50_07_1wkf_9300_30s	RIL50	1	0.861279	1.16508	0.916821	0.254951	0.0576079	35.0699	28.6275	0.183702
RIL50_05_1wkf_9300_30s	RIL50	1	1.9881	0.503773	0.2813	0.224745	0.0347832	46.1475	22.9958	0.501688
RIL50_11_1wkf_9300_30s	RIL50	1	1.17465	0.85361	0.633036	0.225486	0.0497034	41.174	19.96	0.515228
RIL50_01_1wkf_9300_30s	RIL50	1	1.58217	0.709818	0.464722	0.245096	0.264641	35.0187	21.0397	0.399188
RIL50_03_1wkf_9300_30s	RIL50	1	2.59106	0.387006	0.186692	0.202158	0.0437953	43.8749	22.9698	0.47647
RIL50_06_1wkf_9300_30s	RIL50	1	2.39879	0.437757	0.213877	0.225048	0.1501	24.2863	16.407	0.324434
RIL50_09_1wkf_9300_30s	RIL50	1	1.66388	0.612015	0.412903	0.206587	0.0879696	26.3422	17.5008	0.335636
RIL50_08_1wkf_9300_30s	RIL50	1	1.20413	0.834576	0.652654	0.190343	0.0638085	39.3768	21.876	0.444444
RIL5_01_1wkf_EM10x1_30s	RIL5	1	0.980059	1.14342	0.899623	0.265096	0.313456	39.0625	23.4375	0.4
RIL5_08_1wkf_EM10x1_30s	RIL5	1	1.36918	0.807078	0.603856	0.202683	0.434048	62.9864	34.5168	0.451997
RIL5_07_1wkf_EM10x1_30s	RIL5	1	1.05778	0.992691	0.76985	0.245736	0.138546	32.8125	21.875	0.333333
RIL5_02_1wkf_EM10x1_30s	RIL5	1	1.6027	0.666644	0.490691	0.176796	0.147766	65.6436	42.2164	0.356884
RIL5_06_1wkf_EM10x1_30s	RIL5	1	2.18252	0.459616	0.248507	0.212031	0.0556989	40.655	20.3725	0.498893
RIL5_04_1wkf_EM10x1_30s	RIL5	1	1.26529	0.791668	0.556317	0.23458	0.0416181	56.2717	31.25	0.444659
RIL5_10_1wkf_EM10x1_30s	RIL5	1	1.10706	1.10073	0.909888	0.220344	0.538773	50.3891	23.4895	0.533837
RIL5_03_1wkf_EM10x1_30s	RIL5	1	0.726124	1.42052	1.2174	0.213186	0.16147	35.9715	20.3125	0.435316
RIL5_05_1wkf_EM10x1_30s	RIL5	1	1.38451	0.723346	0.525056	0.19829	0.0389145	39.1873	23.4895	0.400583
RIL5_09_1wkf_EM10x1_30s	RIL5	1	1.76916	0.568796	0.359562	0.213193	0.0678531	26.5625	15.625	0.411765
RIL5_11_1wkf_EM10x1_30s	RIL5	1	1.14103	0.880246	0.623033	0.255557	0.0674113	60.9575	40.655	0.33306
RIL48_10_1wkf_EM10x1_30s	RIL48	1	2.04937	0.488519	0.319838	0.169923	0.0333431	56.9197	30.6264	0.461936
RIL48_6_1wkf_EM10x1_30s	RIL48	1	1.63801	0.611725	0.403376	0.208349	0.0450126	48.4369	25.1812	0.480125
RIL48_11_1wkf_EM10x1_30s	RIL48	1	1.9537	0.524074	0.356426	0.168881	0.133916	50.5047	27.4324	0.456835
RIL48_9_1wkf_EM10x1_30s	RIL48	1	1.94256	0.594923	0.4155	0.189541	0.328027	51.8258	29.6135	0.428595
RIL48_8_1wkf_EM10x1_30s	RIL48	1	1.50687	0.670372	0.449403	0.227916	0.0765312	65.71	36.112	0.450434
RIL48_2_1wkf_EM10x1_30s	RIL48	1	1.15989	0.964985	0.745327	0.213329	0.306513	52.6048	32.8868	0.374832
RIL48_5_1wkf_EM10x1_30s	RIL48	1	1.96585	0.509256	0.324111	0.185994	0.0355722	54.3058	30.9373	0.430313
RIL48_7_1wkf_EM10x1_30s	RIL48	1	2.0943	0.477849	0.318365	0.159484	0.0276531	48.4369	25.1812	0.480125
RIL48_12_1wkf_EM10x1_30s	RIL48	1	1.10734	0.993991	0.812054	0.208322	0.17623	52.7865	32.814	0.378363
RIL48_3_1wkf_EM10x1_30s	RIL48	1	1.98427	0.507305	0.320946	0.186425	0.073675	37.3337	23.0737	0.381959
RIL48_1_1wkf_EM10x1_30s	RIL48	1	1.39418	0.72883	0.493736	0.242393	0.115062	60.2484	43.752	0.273807
RIL48_4_1wkf_EM10x1_30s	RIL48	1	1.93463	0.531241	0.354771	0.175727	0.138549	50.3148	26.2512	0.478261
RIL47_08_1wkf_EM10x1_30s	RIL47	1	2.00315	0.502865	0.247807	0.258312	0.0706767	46.875	37.5	0.2
RIL47_09_1wkf_EM10x1_30s	RIL47	1	1.88823	0.538152	0.33733	0.203738	0.103051	45.3394	29.6875	0.345217
RIL47_02_1wkf_EM10x1_30s	RIL47	1	0.786145	1.27714	0.973903	0.314198	0.0607556	64.0816	39.0937	0.389938
RIL47_01_1wkf_EM10x1_30s	RIL47	1	1.08026	0.937696	0.616335	0.322105	0.0961439	39.0937	26.6084	0.319369
RIL47_10_1wkf_EM10x1_30s	RIL47	1	0.927774	1.13107	0.955284	0.20508	0.138406	58.338	31.289	0.463659
RIL47_04_1wkf_EM10x1_30s	RIL47	1	0.91714	1.17659	0.949359	0.262726	0.155728	42.3031	17.2584	0.59203
RIL47_05_1wkf_EM10x1_30s	RIL47	1	1.18354	0.846769	0.569165	0.277604	0.04713	62.9864	42.2164	0.329753
RIL47_03_1wkf_EM10x1_30s	RIL47	1	0.805021	1.24376	0.965998	0.284175	0.0359157	45.4201	29.8515	0.342769
RIL47_07_1wkf_EM10x1_30s	RIL47	1	1.45298	0.780626	0.563308	0.231841	0.141641	42.2164	28.1684	0.332763
RIL47_06_1wkf_EM10x1_30s	RIL47	1	0.802677	1.30523	0.986545	0.35413	0.166372	73.5869	43.8615	0.40395
RIL46_01_1wk_C9300_30s	RIL46	1	0.840491	1.19264	0.927012	0.273344	0.0469928	92.2405	59.3956	0.356079
RIL46_02_1wk_C9300_30s	RIL46	1	1.55584	0.777719	0.572638	0.220217	0.319079	43.1611	26.7674	0.379826
RIL46_05_1wk_C9300_30s	RIL46	1	1.65416	0.662783	0.39447	0.268313	0.249849	84.4329	51.9399	0.384838
RIL46_06_1wk_C9300_30s	RIL46	1	1.00978	1.01131	0.779398	0.243075	0.153096	60.1106	37.63	0.373987
RIL46_07_1wk_C9300_30s	RIL46	1	2.49379	0.401542	0.200087	0.201455	0.0370177	99.3141	50.0976	0.495564
RIL46_08_1wk_C9300_30s	RIL46	1	1.17648	0.854459	0.664265	0.190796	0.0732911	98.549	67.3508	0.316576
RIL46_09_1wk_C9300_30s	RIL46	1	1.21725	0.835792	0.63575	0.205228	0.155223	84.5051	45.5543	0.460928
RIL46_10_1wk_C9300_30s	RIL46	1	2.04364	0.659041	0.369067	0.289669	0.693801	67.2057	39.0625	0.418762
RIL46_11_1wk_C9300_30s	RIL46	1	2.12003	0.477357	0.286312	0.191045	0.101766	74.7718	47.5216	0.364445
RIL46_12_1wk_C9300_30s	RIL46	1	2.14185	0.470951	0.24262	0.227931	0.0914811	75.1463	48.6638	0.352413
RIL45_01_1wk_C9300_30s	RIL45	1	1.28146	0.781037	0.527505	0.253532	0.0300805	79.7028	48.4375	0.392274
RIL45_02_1wk_C9300_30s	RIL45	1	1.13462	0.882278	0.606783	0.2752	0.0323517	94.075	43.75	0.534945
RIL45_03_1wk_C9300_30s	RIL45	1	1.19033	0.848111	0.63156	0.226413	0.0800582	91.7096	48.6638	0.469371
RIL45_04_1wk_C9300_30s	RIL45	1	1.35694	0.765577	0.49772	0.279257	0.160168	75.1463	53.2168	0.291824
RIL45_05_1wk_C9300_30s	RIL45	1	0.937542	1.20248	0.808382	0.354628	0.335679	71.9429	42.1875	0.413597
RIL45_06_1wk_C9300_30s	RIL45	1	3.09521	0.325759	0.143195	0.182688	0.1256	56.2717	31.4059	0.441889
RIL45_07_1wk_C9300_30s	RIL45	1	1.5146	0.715969	0.423191	0.286593	0.381693	75.0651	45.4201	0.394923
RIL45_08_1wk_C9300_30s	RIL45	1	1.3994	0.805445	0.415326	0.386009	0.428274	78.125	43.7779	0.439643
RIL45_10_1wk_C9300_30s	RIL45	1	1.62036	0.692577	0.490565	0.212678	0.220158	78.3746	40.5649	0.482423
RIL45_11_1wk_C9300_30s	RIL45	1	1.28646	0.845332	0.635854	0.225735	0.236347	75.1463	42.1875	0.438595
RIL45_12_1wk_C9300_30s	RIL45	1	1.28833	0.821466	0.611539	0.220234	0.177768	50.0244	34.375	0.312835
RIL45_13_1wk_C9300_30s	RIL45	1	1.42279	0.747996	0.48916	0.270087	0.190342	103.231	59.3956	0.424637
RIL44_01_1wkf_EM10x1_30s	RIL44	1	1.93229	0.517808	0.354734	0.163073	0.0243906	31.7955	22.9958	0.276759
RIL44_02_1wkf_EM10x1_30s	RIL44	1	2.58162	0.387722	0.233362	0.15436	0.0315293	30.9373	16.4434	0.468493
RIL44_03_1wkf_EM10x1_30s	RIL44	1	1.72578	0.809679	0.620536	0.192802	0.465717	54.7884	38.3455	0.300117
RIL44_04_1wkf_EM10x1_30s	RIL44	1	2.49888	0.401431	0.204987	0.197608	0.0601423	41.794	26.2512	0.371891
RIL44_05_1wkf_EM10x1_30s	RIL44	1	1.26036	0.828107	0.664089	0.178972	0.156958	48.5726	29.6135	0.390325
RIL44_06_1wkf_EM10x1_30s	RIL44	1	1.3603	0.745094	0.614749	0.130349	0.130889	44.9657	33.9783	0.244351
RIL44_07_1wkf_EM10x1_30s	RIL44	1	2.62031	0.382158	0.248517	0.13364	0.0341316	42.7842	29.5326	0.309732
RIL44_08_1wkf_EM10x1_30s	RIL44	1	1.98917	0.508599	0.270345	0.238229	0.132445	39.7548	21.0397	0.470764
RIL43_07_1wkf_EM10x1_30s	RIL43	1	2.5779	0.389292	0.165638	0.223654	0.0590443	62.9864	34.5168	0.451997
RIL43_08_1wkf_EM10x1_30s	RIL43	1	1.76994	0.56919	0.362005	0.212165	0.0664682	71.892	46.901	0.347618
RIL43_01_1wkf_EM10x1_30s	RIL43	1	1.72562	0.585235	0.374724	0.217	0.075196	69.3863	37.5325	0.459078
RIL43_03_1wkf_EM10x1_30s	RIL43	1	1.03614	1.24449	1.04726	0.221087	0.535747	64.0625	29.6875	0.536585
RIL43_09_1wkf_EM10x1_30s	RIL43	1	2.2481	0.444942	0.228974	0.215968	0.0167523	51.5862	34.4105	0.332951
RIL43_11_1wkf_EM10x1_30s	RIL43	1	1.08821	0.923037	0.683299	0.248349	0.0594963	85.081	55.2427	0.350704
RIL43_04_1wkf_EM10x1_30s	RIL43	1	1.00275	0.999564	0.746527	0.253038	0.0490487	73.504	45.3394	0.38317
RIL43_06_1wkf_EM10x1_30s	RIL43	1	1.34611	0.817629	0.589574	0.228907	0.308101	83.048	65.625	0.209794
RIL43_05_1wkf_EM10x1_30s	RIL43	1	1.23347	0.846245	0.660323	0.202993	0.119753	73.2378	35.9715	0.50884
RIL43_10_1wkf_EM10x1_30s	RIL43	1	2.03015	0.492765	0.273678	0.219087	0.0230244	72.1462	48.4375	0.32862
RIL43_02_1wkf_EM10x1_30s	RIL43	1	1.42637	0.803513	0.58868	0.230743	0.638484	70.3819	45.3125	0.356191
RIL42_07_1wkf_EM10x1_30s	RIL42	1	0.971097	1.07626	0.857576	0.237267	0.180996	56.25	32.8125	0.416667
RIL42_06_1wkf_EM10x1_30s	RIL42	1	1.48702	0.69091	0.513418	0.187261	0.130094	43.8615	29.7286	0.322216
RIL42_02_1wkf_EM10x1_30s	RIL42	1	0.967885	1.17614	0.942176	0.233964	0.300944	48.4375	23.4895	0.515055
RIL42_04_1wkf_EM10x1_30s	RIL42	1	1.06588	0.940026	0.7065	0.236961	0.044689	37.7918	25	0.338481
RIL42_01_1wkf_EM10x1_30s	RIL42	1	0.924706	1.08833	0.878977	0.221854	0.0716538	43.8615	26.5625	0.3944
RIL42_08_1wkf_EM10x1_30s	RIL42	1	1.07985	0.947553	0.775475	0.186909	0.130845	39.3427	36.0731	0.0831063
RIL42_03_1wkf_EM10x1_30s	RIL42	1	1.75025	0.572119	0.375712	0.197941	0.0371759	56.2717	40.655	0.277522
RIL42_05_1wkf_EM10x1_30s	RIL42	1	0.809099	1.24626	1.04593	0.216136	0.0856299	21.875	17.1875	0.214286
RIL42_09_1wkf_EM10x1_30s	RIL42	1	1.24988	0.813663	0.628285	0.185378	0.107743	25.0488	14.149	0.435141
RIL41_8_1wkf_10x9300_30	RIL41	1	2.09151	0.50275	0.279065	0.225838	0.193586	48.1769	27.3669	0.43195
RIL41_2_1wkf_10x9300_30	RIL41	1	1.07934	1.01219	0.761561	0.265596	0.245282	29.5528	16.4434	0.443593
RIL41_3_1wkf_10x9300_30	RIL41	1	1.62927	0.646051	0.372105	0.278883	0.222477	29.6135	25.3705	0.14328
RIL41_4_1wkf_10x9300_30	RIL41	1	2.638	0.397096	0.236465	0.162403	0.19259	29.5528	21.9851	0.256075
RIL41_6_1wkf_10x9300_30	RIL41	1	1.76283	0.621618	0.314258	0.311033	0.249352	54.7009	31.7391	0.419771
RIL41_7_1wkf_10x9300_30	RIL41	1	1.81453	0.669549	0.383734	0.295373	0.289264	48.1272	29.5528	0.385943
RIL41_12_1wkf_10x9300_30	RIL41	1	1.60838	0.629561	0.357861	0.272535	0.124544	59.1057	29.5326	0.500343
RIL41_9_1wkf_10x9300_30	RIL41	1	2.04933	0.525935	0.257536	0.271688	0.47856	39.4375	30.7044	0.221441
RIL41_5_1wkf_10x9300_30	RIL41	1	1.69647	0.651207	0.327545	0.327146	0.505121	51.9756	31.7391	0.389348
RIL41_1_1wkf_10x9300_30	RIL41	1	1.99592	0.515889	0.267697	0.252007	0.222993	41.6937	25.2523	0.394337
RIL41_11_1wkf_10x9300_30	RIL41	1	1.77603	0.569774	0.356829	0.212944	0.133247	38.6717	24.2863	0.371987
RIL41_10_1wkf_10x9300_30	RIL41	1	1.86336	0.553074	0.35257	0.20685	0.148766	45.9526	27.3669	0.404455
RIL41_13_1wkf_10x9300_30	RIL41	1	1.77761	0.576859	0.34484	0.232019	0.216736	29.5528	16.5522	0.439912
RIL40_7_1wkf_EM10x1_30s	RIL40	1	1.67804	0.731549	0.475626	0.266782	0.631239	50	23.4895	0.530209
RIL40_2_1wkf_EM10x1_30s	RIL40	1	1.81517	0.606716	0.391656	0.216772	0.265802	57.8125	39.0625	0.324324
RIL40_3_1wkf_EM10x1_30s	RIL40	1	1.69604	0.663917	0.491424	0.184216	0.197635	43.8615	29.6875	0.323153
RIL40_5_1wkf_EM10x1_30s	RIL40	1	1.96428	0.509405	0.2818	0.227604	0.024582	42.3031	21.875	0.482898
RIL40_8_1wkf_EM10x1_30s	RIL40	1	0.991299	1.02131	0.799004	0.230208	0.106574	51.7751	34.375	0.336071
RIL40_6_1wkf_EM10x1_30s	RIL40	1	1.75592	0.593775	0.378541	0.217103	0.187594	31.289	18.815	0.398671
RIL40_1_1wkf_EM10x1_30s	RIL40	1	1.03591	0.977418	0.759445	0.231778	0.0933437	40.8945	25	0.388671
RIL40_4_1wkf_EM10x1_30s	RIL40	1	1.24898	0.874412	0.690967	0.209237	0.230485	36.2419	26.7457	0.262023
RIL4_10_1wkf_10x9300_30	RIL4	1	0.851322	1.84835	1.63799	0.273833	2.45433	54.7337	37.2053	0.32025
RIL4_11_1wkf_10x9300_30	RIL4	1	0.789719	3.31301	3.33321	0.277379	6.01446	61.2919	36.1616	0.410009
RIL4_12_1wkf_10x9300_30	RIL4	1	3.30135	0.307475	0.135852	0.171649	0.212539	53.6408	36.112	0.326782
RIL4_13_1wkf_10x9300_30	RIL4	1	1.89788	0.538446	0.354279	0.187407	0.195758	40.4706	27.3669	0.323784
RIL4_14_1wkf_10x9300_30	RIL4	1	2.80631	0.358855	0.174048	0.184807	0.11947	74.3864	42.6582	0.426533
RIL4_2_1wkf_10x9300_30	RIL4	1	1.31783	0.806716	0.581918	0.240124	0.254267	67.9566	36.112	0.468602
RIL4_3_1wkf_10x9300_30	RIL4	1	2.01386	0.502325	0.297557	0.204767	0.140505	65.7737	47.0461	0.284727
RIL4_5_1wkf_10x9300_30	RIL4	1	1.02301	0.993773	0.687496	0.312525	0.139517	62.385	41.6937	0.33167
RIL4_8_1wkf_10x9300_30	RIL4	1	3.08043	0.340332	0.147011	0.195021	0.261878	40.8385	31.7955	0.221431
RIL4_9_1wkf_10x9300_30	RIL4	1	2.09432	0.484584	0.254206	0.233726	0.150494	73.358	47.0842	0.358158
RIL39_05_1wkf_EM10x1_30s	RIL39	1	1.79765	0.591953	0.347366	0.250293	0.173542	53.2168	35.9375	0.324697
RIL39_12_1wkf_EM10x1_30s	RIL39	1	0.993518	1.19413	0.894817	0.321624	0.212202	67.2601	31.25	0.535386
RIL39_02_1wkf_EM10x1_30s	RIL39	1	2.08091	0.486046	0.268798	0.221296	0.0813301	37.5325	25.0488	0.332612
RIL39_07_1wkf_EM10x1_30s	RIL39	1	1.39893	0.781553	0.545613	0.250298	0.225365	54.7767	25	0.543602
RIL39_03_1wkf_EM10x1_30s	RIL39	1	2.34961	0.42864	0.188874	0.239766	0.109601	67.2601	35.9375	0.465694
RIL39_04_1wkf_EM10x1_30s	RIL39	1	2.75182	0.36614	0.174675	0.191465	0.114905	28.125	14.0625	0.5
RIL39_09_1wkf_EM10x1_30s	RIL39	1	2.67481	0.374149	0.15673	0.218295	0.0270335	45.9811	27.2879	0.406541
RIL39_06_1wkf_EM10x1_30s	RIL39	1	1.50144	0.699395	0.353334	0.349652	0.221053	57.8969	25.0488	0.567355
RIL39_11_1wkf_EM10x1_30s	RIL39	1	1.20288	0.869344	0.64605	0.238659	0.169027	40.625	21.9307	0.460167
RIL39_01_1wkf_EM10x1_30s	RIL39	1	0.932632	1.10712	0.855716	0.275974	0.126958	60.1106	35.9715	0.401579
RIL39_10_1wkf_EM10x1_30s	RIL39	1	1.18837	0.876473	0.530247	0.360311	0.168502	50.0976	29.8515	0.404132
RIL39_08_1wkf_EM10x1_30s	RIL39	1	1.93575	0.51888	0.314643	0.204238	0.0636309	51.5862	25.0488	0.514428
RIL38_02_1wk_C9300_30s	RIL38	1	1.61848	0.767999	0.419292	0.35652	0.5669	54.7098	36.0731	0.340646
RIL38_03_1wk_C9300_30s	RIL38	1	1.67775	0.598194	0.332473	0.265736	0.0597451	53.148	34.375	0.353221
RIL38_05_1wk_C9300_30s	RIL38	1	1.70546	0.590771	0.320484	0.274633	0.0767511	53.4914	29.7286	0.444236
RIL38_06_1wk_C9300_30s	RIL38	1	0.966246	1.05245	0.78343	0.281223	0.129257	50.0244	32.8497	0.343327
RIL38_07_1wk_C9300_30s	RIL38	1	1.44065	0.735154	0.490347	0.252616	0.211254	45.4201	26.6084	0.414171
RIL38_08_1wk_C9300_30s	RIL38	1	1.21463	0.930974	0.637153	0.293821	0.262516	51.6571	33.1456	0.358353
RIL38_09_1wk_C9300_30s	RIL38	1	2.70663	0.371325	0.166067	0.206146	0.0665096	66.0884	42.3031	0.359901
RIL38_10_1wk_C9300_30s	RIL38	1	1.39664	0.849896	0.473925	0.388393	0.381072	53.6964	33.1456	0.382721
RIL38_11_1wk_C9300_30s	RIL38	1	1.35853	0.846017	0.576408	0.269609	0.363117	55.0435	34.5168	0.372918
RIL37_5_1wkf_10x9300_30	RIL37	1	0.763583	1.99083	1.77622	0.286067	1.35062	67.8509	47.0461	0.306625
RIL37_8_1wkf_10x9300_30	RIL37	1	1.61759	0.627721	0.424756	0.202965	0.164107	48.1769	24.0884	0.5
RIL37_2_1wkf_10x9300_30	RIL37	1	1.90294	0.533119	0.306301	0.229038	0.140952	36.112	21.9851	0.391196
RIL37_7_1wkf_10x9300_30	RIL37	1	0.813591	1.72687	1.35471	0.3057	0.783157	63.5252	39.3768	0.380139
RIL37_9_1wkf_10x9300_30	RIL37	1	1.03112	2.43923	2.19607	0.222619	6.22721	40.5297	22.9698	0.43326
RIL37_1_1wkf_10x9300_30	RIL37	1	1.42546	0.703632	0.456257	0.247376	0.0537017	70.0032	27.3669	0.609063
RIL37_6_1wkf_10x9300_30	RIL37	1	0.86008	1.72886	1.40319	0.29096	1.56883	55.7838	28.4598	0.489819
RIL37_3_1wkf_10x9300_30	RIL37	1	1.76967	0.57035	0.324199	0.24615	0.130373	41.5788	18.6267	0.552013
RIL37_4_1wkf_10x9300_30	RIL37	1	2.38888	0.45758	0.183109	0.274471	0.600416	55.9551	32.814	0.413566
RIL34_01_1wkf_EM10x1_30s	RIL34	1	1.571	0.780938	0.457082	0.323855	0.274782	58.1363	27.4324	0.528137
RIL34_02_1wkf_EM10x1_30s	RIL34	1	0.863773	2.22717	1.89798	0.329187	1.67885	30.8017	18.6267	0.395269
RIL34_04_1wkf_EM10x1_30s	RIL34	1	2.35803	0.44877	0.16445	0.284745	0.241164	34.346	22.9958	0.330466
RIL34_05_1wkf_EM10x1_30s	RIL34	1	1.64759	0.648572	0.396337	0.2502	0.233219	31.7391	24.0884	0.241047
RIL34_06_1wkf_EM10x1_30s	RIL34	1	1.46715	0.983548	0.699469	0.284079	1.40764	45.0587	20.811	0.538137
RIL34_03_1wkf_EM10x1_30s	RIL34	1	2.5346	0.42894	0.222663	0.208616	0.431064	32.814	24.0636	0.266667
RIL34_05_1wkf_EM10x1_30s	RIL34	1	1.54257	0.666917	0.482182	0.1965	0.106301	41.5644	25.2523	0.392453
RIL34_01_1wkf_EM10x1_30s	RIL34	1	1.01246	0.992667	0.806042	0.196549	0.0626837	49.221	32.8868	0.331853
RIL34_04_1wkf_EM10x1_30s	RIL34	1	2.07093	0.483358	0.27485	0.208495	0.031906	43.7657	27.4324	0.373199
RIL34_02_1wkf_EM10x1_30s	RIL34	1	1.88933	0.534612	0.330952	0.203178	0.0986009	43.7657	26.274	0.399667
RIL33_10_1wkf_10x9300_30	RIL33	1	1.52388	0.660719	0.419775	0.246165	0.0741499	41.6219	19.7188	0.526241
RIL33_2_1wkf_10x9300_30	RIL33	1	2.14362	0.470292	0.258241	0.215065	0.0701098	62.4329	29.7143	0.52406
RIL33_3_1wkf_10x9300_30	RIL33	1	2.04412	0.495426	0.289896	0.210056	0.078832	41.6937	26.4555	0.36548
RIL33_4_1wkf_10x9300_30	RIL33	1	1.71424	0.583945	0.377224	0.208447	0.0311694	59.4287	27.3669	0.539501
RIL33_5_1wkf_10x9300_30	RIL33	1	1.13426	0.885447	0.632607	0.26109	0.0596256	58.3417	26.2512	0.550044
RIL33_6_1wkf_10x9300_30	RIL33	1	2.18952	0.459345	0.270441	0.192113	0.0578855	58.1363	31.7391	0.454058
RIL33_7_1wkf_10x9300_30	RIL33	1	1.24749	0.803273	0.547266	0.256007	0.0448776	55.7945	25.1812	0.54868
RIL33_8_1wkf_10x9300_30	RIL33	1	2.1829	0.458812	0.262228	0.197238	0.0390091	64.7655	31.8895	0.507616
RIL33_9_1wkf_10x9300_30	RIL33	1	1.49333	0.671635	0.459594	0.216372	0.0487824	36.1616	24.1628	0.33181
RIL32_10_1wkf_10x9300_30	RIL32	1	1.63287	0.672316	0.456965	0.225069	0.174539	62.586	36.3596	0.419046
RIL32_1_1wkf_10x9300_30	RIL32	1	1.35797	0.744448	0.513736	0.239154	0.0841978	65.6644	36.1616	0.449297
RIL32_2_1wkf_10x9300_30	RIL32	1	0.795351	1.84403	1.63986	0.291617	1.12455	89.7516	50.4217	0.438209
RIL32_3_1wkf_10x9300_30	RIL32	1	1.81948	0.56509	0.338876	0.22565	0.145341	64.5435	44.8591	0.304978
RIL32_4_1wkf_10x9300_30	RIL32	1	0.770959	1.41604	1.21282	0.234426	0.268065	72.1908	55.7945	0.227124
RIL32_5_1wkf_10x9300_30	RIL32	1	0.940009	1.0951	0.839591	0.267263	0.173179	67.8244	39.4375	0.418535
RIL32_6_1wkf_10x9300_30	RIL32	1	1.11505	0.961882	0.736941	0.259086	0.171646	54.69	40.5297	0.25892
RIL32_7_1wkf_10x9300_30	RIL32	1	1.98195	0.504969	0.319024	0.186677	0.0286507	75.5039	45.9917	0.39087
RIL32_8_1wkf_10x9300_30	RIL32	1	0.839238	1.6012	1.37254	0.27827	0.465633	80.1167	44.8991	0.439578
RIL32_9_1wkf_10x9300_30	RIL32	1	1.24074	0.818201	0.577134	0.252535	0.0933809	68.9094	42.6582	0.380952
RIL31_10_1wkf_10x9300_30	RIL31	1	1.16523	0.863426	0.606308	0.261452	0.0767725	77.7829	35.1551	0.548036
RIL31_1_1wkf_10x9300_30	RIL31	1	1.794	0.590934	0.357483	0.239343	0.311848	56.8881	27.3669	0.518935
RIL31_2_1wkf_10x9300_30	RIL31	1	0.792142	1.26701	1.06288	0.210169	0.0605175	76.566	41.5788	0.456955
RIL31_3_1wkf_10x9300_30	RIL31	1	1.37129	0.744624	0.503988	0.240636	0.143428	73.4151	36.1616	0.507436
RIL31_4_1wkf_10x9300_30	RIL31	1	1.55451	0.643947	0.421139	0.222808	0.0323701	64.5713	35.0699	0.456881
RIL31_5_1wkf_10x9300_30	RIL31	1	1.66163	0.612623	0.412322	0.207485	0.0891443	53.6966	30.7044	0.428186
RIL31_6_1wkf_10x9300_30	RIL31	1	0.874475	1.46078	1.23416	0.286514	0.69235	68.9181	39.3768	0.428643
RIL31_7_1wkf_10x9300_30	RIL31	1	1.75555	0.570102	0.373052	0.197356	0.0291072	62.4999	30.6459	0.509665
RIL31_8_1wkf_10x9300_30	RIL31	1	0.973871	1.02984	0.785423	0.253676	0.0535209	61.2626	32.8868	0.463182
RIL31_9_1wkf_10x9300_30	RIL31	1	0.941016	1.06626	0.799112	0.267152	0.0558424	73.3172	38.3455	0.476993
RIL30_05_1wkf_EM10x1_30s	RIL30	1	2.36071	0.426595	0.253023	0.174128	0.0792363	43.75	26.7457	0.38867
RIL30_03_1wkf_EM10x1_30s	RIL30	1	1.3413	0.758928	0.591626	0.175137	0.103942	56.5962	29.8515	0.472552
RIL30_01_1wkf_EM10x1_30s	RIL30	1	0.913896	1.14269	0.965104	0.206822	0.132148	90.6385	56.2717	0.379163
RIL30_11_1wkf_EM10x1_30s	RIL30	1	1.13292	0.916384	0.714996	0.217643	0.181535	100.984	59.703	0.408787
RIL30_12_1wkf_EM10x1_30s	RIL30	1	1.63117	0.626064	0.479223	0.155063	0.0942411	54.7767	35.9375	0.343927
RIL30_07_1wkf_EM10x1_30s	RIL30	1	1.75573	0.571698	0.383302	0.188396	0.061555	56.3367	34.4105	0.3892
RIL30_09_1wkf_EM10x1_30s	RIL30	1	1.85241	0.558442	0.370062	0.195335	0.149409	73.504	45.3125	0.383537
RIL30_04_1wkf_EM10x1_30s	RIL30	1	1.78379	0.580321	0.408101	0.172219	0.108107	32.8497	15.7029	0.521976
RIL30_08_1wkf_EM10x1_30s	RIL30	1	0.975423	1.04331	0.87413	0.177853	0.111792	70.4686	42.1875	0.401329
RIL30_10_1wkf_EM10x1_30s	RIL30	1	1.38684	0.804342	0.629983	0.181732	0.304371	65.6994	42.3031	0.356111
RIL30_06_1wkf_EM10x1_30s	RIL30	1	3.63966	0.275094	0.140814	0.134918	0.0327178	56.3367	32.8125	0.417565
RIL30_02_1wkf_EM10x1_30s	RIL30	1	1.36796	1.10116	0.921045	0.214166	0.19712	71.892	46.875	0.34798
RIL3_10_1wkf_10x9300_30	RIL3	1	0.974429	1.06526	0.833269	0.241626	0.260805	62.4329	32.8322	0.47412
RIL3_11_1wkf_10x9300_30	RIL3	1	1.49979	0.740048	0.460715	0.279333	0.530772	49.2332	25.1812	0.488532
RIL3_1_1wkf_10x9300_30	RIL3	1	1.4852	0.725432	0.459926	0.265506	0.182571	58.0127	32.8322	0.434051
RIL3_2_1wkf_10x9300_30	RIL3	1	2.3432	0.450558	0.199967	0.252085	0.460129	79.9148	50.6112	0.366686
RIL3_3_1wkf_10x9300_30	RIL3	1	1.74022	0.583328	0.357973	0.225356	0.168099	53.6408	20.811	0.612031
RIL3_4_1wkf_10x9300_30	RIL3	1	1.6946	0.605413	0.373302	0.232112	0.222766	55.8267	31.7202	0.431809
RIL3_5_1wkf_10x9300_30	RIL3	1	1.38308	0.770284	0.521439	0.259786	0.312395	43.7657	19.7188	0.549447
RIL3_6_1wkf_10x9300_30	RIL3	1	1.27907	0.81836	0.625562	0.206458	0.221175	72.4885	40.4706	0.441696
RIL3_7_1wkf_10x9300_30	RIL3	1	0.997108	1.03985	0.86222	0.200629	0.139382	60.5159	25.2523	0.582716
RIL3_8_1wkf_10x9300_30	RIL3	1	1.94425	0.515505	0.317742	0.196385	0.0464912	48.1769	24.0884	0.5
RIL3_9_1wkf_10x9300_30	RIL3	1	1.8144	0.568588	0.377631	0.197792	0.170167	73.3172	39.392	0.462719
RIL29_01_1wkf_EM10x1_30s	RIL29	1	2.47157	0.40521	0.249506	0.155704	0.0394549	60.1689	33.9254	0.436164
RIL29_02_1wkf_EM10x1_30s	RIL29	1	1.17444	0.877312	0.653086	0.224225	0.130343	83.3085	51.4551	0.382355
RIL29_03_1wkf_EM10x1_30s	RIL29	1	1.57742	0.64455	0.435435	0.217431	0.0881129	52.548	25.1812	0.520796
RIL29_04_1wkf_EM10x1_30s	RIL29	1	2.56684	0.391594	0.216366	0.175702	0.0698697	61.6034	30.6264	0.502845
RIL29_05_1wkf_EM10x1_30s	RIL29	1	1.08746	0.969657	0.755178	0.238054	0.132562	59.0652	32.9777	0.441674
RIL29_06_1wkf_EM10x1_30s	RIL29	1	2.24636	0.451028	0.279509	0.175466	0.0828264	57.9714	28.4598	0.509071
RIL29_07_1wkf_EM10x1_30s	RIL29	1	1.02218	0.986118	0.790273	0.19614	0.0842345	65.6644	38.5322	0.413195
RIL29_08_1wkf_EM10x1_30s	RIL29	1	1.26731	0.829253	0.609437	0.23649	0.128954	62.4999	28.4598	0.544642
RIL29_09_1wkf_EM10x1_30s	RIL29	1	1.6265	0.615589	0.41823	0.197358	0.037339	64.5713	39.392	0.389946
RIL29_10_1wkf_EM10x1_30s	RIL29	1	1.27523	0.792184	0.618485	0.179039	0.0858701	56.8881	37.2053	0.345992
RIL29_11_1wkf_EM10x1_30s	RIL29	1	2.71322	0.371158	0.208149	0.163009	0.113636	62.385	32.8322	0.473716
RIL29_12_1wkf_EM10x1_30s	RIL29	1	1.71323	0.683508	0.525085	0.170634	0.148216	57.1399	28.4388	0.502295
RIL28_10_1wkf_10x9300_30	RIL28	1	0.775986	1.68743	1.3896	0.297825	0.923567	59.0753	27.4324	0.535638
RIL28_1_1wkf_10x9300_30	RIL28	1	2.32458	0.672547	0.431197	0.235898	1.8925	50.4217	30.6264	0.392595
RIL28_2_1wkf_10x9300_30	RIL28	1	0.644051	2.27521	2.11289	0.285191	1.77098	62.3466	32.814	0.473684
RIL28_3_1wkf_10x9300_30	RIL28	1	0.892817	1.15943	0.909166	0.277108	0.143403	62.586	35.0016	0.440744
RIL28_4_1wkf_10x9300_30	RIL28	1	1.44884	0.690675	0.451644	0.239032	0.026197	45.3235	32.0205	0.293511
RIL28_5_1wkf_10x9300_30	RIL28	1	1.72639	0.579772	0.339502	0.24027	0.0306982	52.5138	27.5412	0.475544
RIL28_6_1wkf_10x9300_30	RIL28	1	1.40043	0.717641	0.469212	0.251969	0.0648491	65.71	38.4234	0.415258
RIL28_7_1wkf_10x9300_30	RIL28	1	2.03663	0.63514	0.381565	0.263882	0.989622	48.1769	30.6459	0.363887
RIL28_8_1wkf_10x9300_30	RIL28	1	1.51459	0.664869	0.427873	0.243788	0.0681533	68.9441	38.2986	0.444498
RIL28_9_1wkf_10x9300_30	RIL28	1	0.640379	1.68873	1.51381	0.26206	0.223286	61.2626	36.0954	0.410808
RIL27_10_1wkf_10x9300_30	RIL27	1	1.45742	0.803292	0.443751	0.359541	0.491781	68.9441	36.1616	0.475494
RIL27_1_1wkf_10x9300_30	RIL27	1	0.824362	1.27518	1.01107	0.28079	0.179991	67.8156	32.814	0.516129
RIL27_2_1wkf_10x9300_30	RIL27	1	0.989689	1.05575	0.816604	0.264739	0.128319	65.71	31.7391	0.516983
RIL27_3_1wkf_10x9300_30	RIL27	1	1.89412	0.549498	0.318797	0.230701	0.167015	69.0482	36.1616	0.476284
RIL27_4_1wkf_10x9300_30	RIL27	1	0.685391	1.67752	1.47487	0.282626	0.204273	64.5342	33.9254	0.474303
RIL27_5_1wkf_10x9300_30	RIL27	1	2.6463	0.380559	0.150619	0.23178	0.0942752	50.3267	27.345	0.45665
RIL27_6_1wkf_10x9300_30	RIL27	1	1.08656	0.964713	0.720591	0.262352	0.165293	56.0512	27.345	0.512143
RIL27_7_1wkf_10x9300_30	RIL27	1	2.18335	0.459489	0.251987	0.20776	0.0585064	61.8747	30.9373	0.5
RIL27_8_1wkf_10x9300_30	RIL27	1	2.19813	0.45574	0.252086	0.205645	0.0386639	60.1689	31.7391	0.472501
RIL27_9_1wkf_10x9300_30	RIL27	1	1.14754	0.985366	0.75227	0.233095	0.214141	65.6371	29.5326	0.550062
RIL26_10_1wkf_EM10x1_30s	RIL26	1	1.33839	0.749265	0.567457	0.183363	0.0530778	43.9702	24.0636	0.45273
RIL26_11_1wkf_EM10x1_30s	RIL26	1	2.18835	0.488034	0.283439	0.205217	0.241649	55.7945	27.4324	0.508332
RIL26_1_1wkf_EM10x1_30s	RIL26	1	1.09597	1.02947	0.781788	0.248811	0.494192	47.0842	27.345	0.419233
RIL26_2_1wkf_EM10x1_30s	RIL26	1	1.38535	0.72263	0.509485	0.213145	0.0329474	43.7657	22.9698	0.475164
RIL26_3_1wkf_EM10x1_30s	RIL26	1	1.49265	0.720291	0.507264	0.221065	0.210298	53.6408	28.4598	0.469437
RIL26_4_1wkf_EM10x1_30s	RIL26	1	1.14483	0.948808	0.729367	0.219442	0.237052	38.2986	25.1812	0.342505
RIL26_6_1wkf_EM10x1_30s	RIL26	1	1.3394	0.961697	0.675229	0.282288	0.76804	61.2626	52.6844	0.140023
RIL26_7_1wkf_EM10x1_30s	RIL26	1	1.8541	0.539837	0.357235	0.182602	0.0301088	53.8745	33.9783	0.369307
RIL26_8_1wkf_EM10x1_30s	RIL26	1	2.04114	0.502307	0.33344	0.16974	0.154943	73.4151	42.6722	0.418754
RIL26_9_1wkf_EM10x1_30s	RIL26	1	2.11773	0.491375	0.246495	0.242777	0.234069	71.1054	38.283	0.461602
RIL24_10_1wkf_10x9300_30	RIL24	1	1.47391	0.683403	0.402872	0.277949	0.0870427	56.8776	27.4324	0.517695
RIL24_1_1wkf_10x9300_30	RIL24	1	0.784989	1.31354	0.993864	0.319673	0.232544	50.5047	24.0884	0.523045
RIL24_2_1wkf_10x9300_30	RIL24	1	1.71362	0.586248	0.293499	0.292976	0.0675102	47.1477	25.2523	0.4644
RIL24_3_1wkf_10x9300_30	RIL24	1	1.03912	1.2117	0.832616	0.367251	1.40318	36.112	23.0737	0.36105
RIL24_4_1wkf_10x9300_30	RIL24	1	2.81422	0.359253	0.14078	0.218243	0.143999	32.8868	22.9958	0.300759
RIL24_5_1wkf_10x9300_30	RIL24	1	1.81807	0.562497	0.311916	0.25506	0.17592	31.7955	17.8058	0.439992
RIL24_6_1wkf_10x9300_30	RIL24	1	0.995829	1.06168	0.783683	0.304677	0.138645	53.0578	28.9599	0.454182
RIL24_7_1wkf_10x9300_30	RIL24	1	1.22556	0.817157	0.527395	0.289761	0.0382285	47.0842	21.9033	0.534806
RIL24_8_1wkf_10x9300_30	RIL24	1	4.05772	0.297932	0.171284	0.128255	0.449476	42.4755	28.6275	0.326024
RIL23_10_1wkf_10x9300_30	RIL23	1	1.2545	0.799806	0.478653	0.320908	0.0581773	50.5047	26.3422	0.478421
RIL23_1_1wkf_10x9300_30	RIL23	1	0.537076	2.07464	1.73281	0.34183	0.533372	64.784	27.6712	0.57287
RIL23_2_1wkf_10x9300_30	RIL23	1	1.88648	0.530736	0.243969	0.286767	0.0352105	56.9722	25.1574	0.558427
RIL23_3_1wkf_10x9300_30	RIL23	1	0.986131	1.1063	0.757182	0.369765	0.314665	52.7978	31.569	0.402078
RIL23_4_1wkf_10x9300_30	RIL23	1	0.974539	1.03642	0.676507	0.372961	0.093756	53.9965	30.7044	0.431363
RIL23_5_1wkf_10x9300_30	RIL23	1	1.27209	0.789397	0.474966	0.314431	0.0652077	61.4089	29.5528	0.518753
RIL23_6_1wkf_10x9300_30	RIL23	1	0.880735	1.31058	0.999166	0.311415	0.646489	50.3148	24.0636	0.521739
RIL23_7_1wkf_10x9300_30	RIL23	1	1.99575	0.501987	0.212183	0.289804	0.0422921	44.8458	28.4598	0.365385
RIL23_8_1wkf_10x9300_30	RIL23	1	1.41065	1.0196	0.725986	0.303092	0.877933	45.9526	22.9958	0.499575
RIL23_9_1wkf_10x9300_30	RIL23	1	1.8044	0.556284	0.295065	0.263521	0.0597887	55.8802	28.4598	0.4907
RIL22_1_1wkf_10x9300_30	RIL22	1	1.56949	0.641467	0.363532	0.279261	0.0790285	37.4457	21.9033	0.415064
RIL22_2_1wkf_10x9300_30	RIL22	1	1.69416	0.619211	0.299984	0.320398	0.177476	70.0032	39.3768	0.4375
RIL22_3_1wkf_10x9300_30	RIL22	1	2.17861	0.537608	0.246082	0.296346	0.346064	43.0073	24.6773	0.426208
RIL22_4_1wkf_10x9300_30	RIL22	1	1.35537	0.801455	0.496409	0.305046	0.298321	33.1044	20.811	0.371353
RIL22_5_1wkf_10x9300_30	RIL22	1	0.88724	1.1335	0.830592	0.304838	0.0732931	29.6135	20.7822	0.298219
RIL22_7_1wkf_10x9300_30	RIL22	1	1.12382	0.903773	0.666085	0.243832	0.106939	41.6219	25.2523	0.393293
RIL22_04_1wkf_EM10x1_30s	RIL22	1	2.2782	0.484027	0.309435	0.175173	0.582062	37.2053	21.0397	0.434498
RIL22_02_1wkf_EM10x1_30s	RIL22	1	1.37281	0.794195	0.563836	0.239237	0.409414	35.0187	23.203	0.337411
RIL22_05_1wkf_EM10x1_30s	RIL22	1	1.64414	0.825931	0.567597	0.258335	2.00083	21.9851	14.2194	0.353226
RIL22_03_1wkf_EM10x1_30s	RIL22	1	2.33365	0.437217	0.274901	0.166335	0.104815	33.9783	21.876	0.356177
RIL22_01_1wkf_EM10x1_30s	RIL22	1	1.09357	0.920355	0.79038	0.151903	0.074662	30.6459	19.8096	0.353599
RIL20_1_1wkf_10x9300_30	RIL20	1	1.84705	0.557208	0.217036	0.340172	0.205235	62.586	31.1109	0.50291
RIL20_2_1wkf_10x9300_30	RIL20	1	1.45542	0.689059	0.383096	0.309201	0.0513746	53.2266	26.8148	0.496214
RIL20_3_1wkf_10x9300_30	RIL20	1	1.97953	0.507911	0.224668	0.283364	0.0698287	62.4329	29.7143	0.52406
RIL20_4_1wkf_10x9300_30	RIL20	1	2.43794	0.411691	0.187117	0.224574	0.0588088	46.1475	33.1044	0.282639
RIL20_5_1wkf_10x9300_30	RIL20	1	1.82639	0.60033	0.27276	0.327976	0.456536	43.8749	24.0636	0.45154
RIL20_6_1wkf_10x9300_30	RIL20	1	2.71901	0.368356	0.143929	0.225451	0.03735	45.0587	20.811	0.538137
RIL20_7_1wkf_10x9300_30	RIL20	1	2.56531	0.390343	0.164441	0.225902	0.0367226	50.741	25.1812	0.503731
RIL20_8_1wkf_10x9300_30	RIL20	1	2.05841	0.486634	0.219877	0.266757	0.0407539	32.1882	19.7188	0.387392
RIL2_10_1wkf_10x9300_30	RIL2	1	1.50292	0.667373	0.452393	0.219416	0.0486683	88.6046	43.7657	0.506056
RIL2_1_1wkf_10x9300_30	RIL2	1	0.779179	1.28581	0.950554	0.33526	0.0431242	42.6722	27.4324	0.357138
RIL2_2_1wkf_10x9300_30	RIL2	1	2.71795	0.437825	0.249054	0.187963	0.37409	28.6275	16.5522	0.421807
RIL2_3_1wkf_10x9300_30	RIL2	1	0.983526	1.09537	0.76355	0.327446	0.213839	45.9396	26.2512	0.428571
RIL2_4_1wkf_10x9300_30	RIL2	1	3.32274	0.438683	0.275611	0.166209	0.577622	56.8881	28.4388	0.500092
RIL2_5_1wkf_10x9300_30	RIL2	1	1.1013	0.91365	0.650532	0.269345	0.0756047	62.4329	38.3455	0.385813
RIL2_6_1wkf_10x9300_30	RIL2	1	2.26678	0.566152	0.217557	0.349693	0.564895	65.6371	39.392	0.399852
RIL2_7_1wkf_10x9300_30	RIL2	1	1.42375	0.703327	0.470588	0.235859	0.0350894	45.9526	27.4324	0.403029
RIL2_9_1wkf_10x9300_30	RIL2	1	1.41903	0.710033	0.500999	0.215401	0.0759416	44.8458	26.3422	0.412605
RIL199_1_1wkf_EM10x1_30s	RIL199	1	1.89808	0.805517	0.622996	0.193291	0.355926	30.6459	20.811	0.320922
RIL199_5_1wkf_EM10x1_30s	RIL199	1	1.20812	0.829213	0.627679	0.205953	0.0395067	38.8415	26.4555	0.318885
RIL199_2_1wkf_EM10x1_30s	RIL199	1	2.57195	0.415278	0.239176	0.179244	0.143327	51.4086	26.274	0.488919
RIL199_4_1wkf_EM10x1_30s	RIL199	1	1.35792	0.746838	0.514243	0.24035	0.111796	35.0187	21.9851	0.372189
RIL199_11_1wkf_EM10x1_30s	RIL199	1	2.07494	0.484357	0.290681	0.196999	0.0590707	36.0954	25.1812	0.302372
RIL199_6_1wkf_EM10x1_30s	RIL199	1	1.38149	0.744759	0.511816	0.244691	0.115924	35.0699	20.897	0.404132
RIL199_7_1wkf_EM10x1_30s	RIL199	1	3.04198	0.347227	0.16793	0.181231	0.155188	51.4086	30.6264	0.404255
RIL199_10_1wkf_EM10x1_30s	RIL199	1	1.28322	1.00337	0.81734	0.209869	0.240348	44.9657	29.5528	0.342769
RIL199_3_1wkf_EM10x1_30s	RIL199	1	1.73197	0.577532	0.378884	0.198648	0.0165228	37.1892	21.876	0.411765
RIL199_9_1wkf_EM10x1_30s	RIL199	1	1.87669	0.533251	0.337506	0.196662	0.0273256	41.5644	26.274	0.367873
RIL199_8_1wkf_EM10x1_30s	RIL199	1	2.31397	0.434667	0.275201	0.161829	0.0751763	31.7202	18.6267	0.41278
RIL198_10_1wkf_EM10x1_30s	RIL198	1	1.1272	0.888136	0.718224	0.169374	0.0336779	36.112	25.1574	0.30335
RIL198_11_1wkf_EM10x1_30s	RIL198	1	1.09055	1.04505	0.824567	0.220486	0.321052	39.5133	27.345	0.307954
RIL198_1_1wkf_EM10x1_30s	RIL198	1	0.704041	1.46791	1.28811	0.216508	0.150498	42.6722	29.5326	0.30792
RIL198_2_1wkf_EM10x1_30s	RIL198	1	1.2226	0.965705	0.79741	0.181354	0.342126	63.4498	42.6722	0.327465
RIL198_3_1wkf_EM10x1_30s	RIL198	1	1.97092	0.507977	0.323808	0.186018	0.0328782	35.1551	19.6884	0.439956
RIL198_4_1wkf_EM10x1_30s	RIL198	1	0.637798	1.64543	1.37921	0.241958	0.217884	52.6048	32.814	0.376217
RIL198_5_1wkf_EM10x1_30s	RIL198	1	1.11656	1.05399	0.853619	0.221137	0.539854	52.5138	26.3422	0.498376
RIL198_6_1wkf_EM10x1_30s	RIL198	1	1.03557	1.09264	0.851762	0.241013	0.338376	36.0954	22.9958	0.362915
RIL198_7_1wkf_EM10x1_30s	RIL198	1	1.7054	0.930712	0.755815	0.191416	2.1569	54.7337	24.1628	0.558539
RIL198_8_1wkf_EM10x1_30s	RIL198	1	1.56342	0.781851	0.559525	0.222326	0.394794	58.1363	33.9783	0.41554
RIL198_9_1wkf_EM10x1_30s	RIL198	1	1.27878	0.799329	0.639296	0.167107	0.182651	61.2919	36.112	0.410819
RIL196_10_1wkf_EM10x1_30s	RIL196	1	0.830233	1.34113	1.2124	0.176263	0.209636	28.5228	20.811	0.270375
RIL196_1_1wkf_EM10x1_30s	RIL196	1	1.73675	0.580228	0.422415	0.159063	0.09828	29.5528	18.6267	0.369714
RIL196_2_1wkf_EM10x1_30s	RIL196	1	1.09738	0.997315	0.761695	0.251236	0.453669	36.112	25.1574	0.30335
RIL196_3_1wkf_EM10x1_30s	RIL196	1	1.45466	0.716725	0.531111	0.197304	0.122458	22.9958	15.3522	0.332391
RIL196_4_1wkf_EM10x1_30s	RIL196	1	1.63262	0.627505	0.448139	0.177304	0.178819	48.1272	22.9958	0.522186
RIL196_5_1wkf_EM10x1_30s	RIL196	1	1.41612	0.879571	0.694495	0.204314	0.327843	38.2986	28.4388	0.257446
RIL196_6_1wkf_EM10x1_30s	RIL196	1	1.14665	0.951323	0.680478	0.2856	0.215858	47.0842	13.1711	0.720265
RIL196_7_1wkf_EM10x1_30s	RIL196	1	1.3952	0.74307	0.574468	0.178967	0.133785	31.7202	22.9958	0.275042
RIL196_8_1wkf_EM10x1_30s	RIL196	1	1.71376	0.621193	0.447722	0.180379	0.221847	25.1812	13.1256	0.478753
RIL196_9_1wkf_EM10x1_30s	RIL196	1	1.17702	0.876884	0.68378	0.194039	0.159547	42.7143	27.4324	0.35777
RIL195_10_1wkf_EM10x1_30s	RIL195	1	1.35342	0.779655	0.55684	0.236371	0.237258	78.1875	48.5382	0.379207
RIL195_1_1wkf_EM10x1_30s	RIL195	1	1.27916	1.01254	0.707348	0.252905	0.855842	51.5862	32.8497	0.363208
RIL195_2_1wkf_EM10x1_30s	RIL195	1	0.678555	1.48753	1.29525	0.216849	0.0866039	54.7767	29.6875	0.458027
RIL195_3_1wkf_EM10x1_30s	RIL195	1	1.1687	0.857605	0.586057	0.271327	0.0488525	45.7415	26.6084	0.418287
RIL195_4_1wkf_EM10x1_30s	RIL195	1	0.92189	1.24467	1.04963	0.2387	0.170795	62.5	35.9375	0.425
RIL195_5_1wkf_EM10x1_30s	RIL195	1	0.753509	1.45199	1.17188	0.254646	0.244576	48.4375	32.8125	0.322581
RIL195_6_1wkf_EM10x1_30s	RIL195	1	2.07539	0.495498	0.229146	0.270143	0.162507	48.4627	34.375	0.290692
RIL195_7_1wkf_EM10x1_30s	RIL195	1	1.89208	0.530705	0.335986	0.197974	0.0563807	62.5195	31.25	0.500156
RIL195_8_1wkf_EM10x1_30s	RIL195	1	0.767322	1.55936	1.31739	0.234853	0.497781	53.2168	29.6875	0.442141
RIL193_05_1wkf_EM10x1_30s	RIL193	1	2.70334	0.370489	0.199311	0.171971	0.0385787	67.8509	45.9526	0.322741
RIL193_02_1wkf_EM10x1_30s	RIL193	1	1.18103	0.849852	0.660349	0.189502	0.0699632	68.9875	43.9702	0.362635
RIL193_07_1wkf_EM10x1_30s	RIL193	1	2.12504	0.490587	0.301504	0.189554	0.112669	83.1935	54.7884	0.341435
RIL193_09_1wkf_EM10x1_30s	RIL193	1	2.01396	0.499379	0.332125	0.170712	0.0615565	56.0512	34.1889	0.390042
RIL193_06_1wkf_EM10x1_30s	RIL193	1	1.03247	0.96922	0.784348	0.184986	0.0271783	55.8267	37.3337	0.331257
RIL193_08_1wkf_EM10x1_30s	RIL193	1	2.87855	0.356029	0.215327	0.143266	0.102475	64.7655	33.9078	0.476453
RIL193_11_1wkf_EM10x1_30s	RIL193	1	1.09236	0.917213	0.729221	0.189463	0.0414885	54.7884	30.6264	0.441005
RIL193_1_1wkf_EM10x1_30s	RIL193	1	2.1532	0.467784	0.288264	0.18075	0.113772	67.8156	40.4854	0.403008
RIL193_03_1wkf_EM10x1_30s	RIL193	1	3.48242	0.287292	0.15153	0.136205	0.0211471	68.2465	34.0662	0.500836
RIL193_04_1wkf_EM10x1_30s	RIL193	1	2.28492	0.445106	0.283898	0.164711	0.131212	59.1563	30.6459	0.48195
RIL193_10_1wkf_EM10x1_30s	RIL193	1	1.61036	0.638825	0.475222	0.173238	0.102296	74.4507	48.2389	0.352069
RIL192_09_1wkf_EM10x1_30s	RIL192	1	2.61096	0.392675	0.188147	0.204528	0.177579	53.6408	39.392	0.265634
RIL192_08_1wkf_EM10x1_30s	RIL192	1	1.84158	0.546141	0.356757	0.189384	0.07445	60.9591	38.2986	0.371733
RIL192_07_1wkf_EM10x1_30s	RIL192	1	1.03707	0.980237	0.748465	0.246408	0.109874	78.7536	54.69	0.305556
RIL192_02_1wkf_EM10x1_30s	RIL192	1	1.90229	0.529401	0.350272	0.183628	0.0632542	59.0753	41.6937	0.294228
RIL192_06_1wkf_EM10x1_30s	RIL192	1	1.94745	0.594474	0.384456	0.210018	0.178333	67.8949	42.6582	0.371703
RIL192_04_1wkf_EM10x1_30s	RIL192	1	1.09369	0.928203	0.697908	0.241997	0.110412	72.1991	53.6074	0.257506
RIL192_03_1wkf_EM10x1_30s	RIL192	1	1.46295	0.683888	0.477004	0.206914	0.0224536	72.2239	49.2696	0.317822
RIL192_01_1wkf_EM10x1_30s	RIL192	1	1.00805	1.10062	0.902463	0.231583	0.189258	55.8802	40.4854	0.275497
RIL192_10_1wkf_EM10x1_30s	RIL192	1	1.09648	0.92051	0.651623	0.280901	0.076598	65.6644	39.392	0.400102
RIL192_05_1wkf_EM10x1_30s	RIL192	1	0.681905	1.46966	1.24177	0.227888	0.0466174	54.9628	34.1889	0.377962
RIL191_9_1wkf_EM10x1_30s	RIL191	1	1.2166	0.891383	0.696086	0.21639	0.155197	37.2053	20.811	0.440645
RIL191_8_1wkf_EM10x1_30s	RIL191	1	0.945085	1.16971	0.975301	0.230915	0.21606	56.1685	40.4854	0.279216
RIL191_1_1wkf_EM10x1_30s	RIL191	1	0.895528	1.12707	0.918737	0.225247	0.081649	32.8322	15.3132	0.533592
RIL191_3_1wkf_EM10x1_30s	RIL191	1	1.18058	0.866465	0.665032	0.196787	0.154648	40.6034	27.4324	0.324383
RIL191_2_1wkf_EM10x1_30s	RIL191	1	1.10364	0.994338	0.818241	0.203018	0.172117	43.752	28.4388	0.35
RIL191_6_1wkf_EM10x1_30s	RIL191	1	1.56643	0.66336	0.506088	0.16804	0.110101	48.1769	30.6459	0.363887
RIL191_4_1wkf_EM10x1_30s	RIL191	1	1.30529	0.912341	0.689808	0.216043	0.356618	40.4854	25.1574	0.378605
RIL191_10_1wkf_EM10x1_30s	RIL191	1	1.70569	0.63472	0.446711	0.197252	0.13069	38.3455	21.9851	0.426657
RIL191_5_1wkf_EM10x1_30s	RIL191	1	1.4578	0.723763	0.56275	0.17445	0.124171	41.794	28.4388	0.319549
RIL191_7_1wkf_EM10x1_30s	RIL191	1	0.725344	1.40965	1.21892	0.212959	0.137785	52.6844	35.0016	0.335636
RIL190_09_1wkf_EM10x1_30s	RIL190	1	1.32449	0.756081	0.543267	0.212813	0.0375217	53.2168	26.6084	0.5
RIL190_11_1wkf_EM10x1_30s	RIL190	1	2.04596	0.492454	0.29493	0.201372	0.0653339	56.2717	26.5625	0.52796
RIL190_10_1wkf_EM10x1_30s	RIL190	1	1.52647	0.778055	0.563536	0.207375	0.308062	53.148	36.0731	0.32127
RIL190_04_1wkf_EM10x1_30s	RIL190	1	2.00124	0.556473	0.363621	0.192852	0.279055	67.3508	32.8497	0.51226
RIL190_02_1wkf_EM10x1_30s	RIL190	1	1.13531	0.910001	0.703207	0.226119	0.115889	57.8336	35.9715	0.378018
RIL190_08_1wkf_EM10x1_30s	RIL190	1	1.15072	0.871386	0.667486	0.210387	0.0478938	56.2717	31.25	0.444659
RIL190_03_1wkf_EM10x1_30s	RIL190	1	1.3479	0.779955	0.599517	0.195645	0.123321	54.7098	31.289	0.428091
RIL190_01_1wkf_EM10x1_30s	RIL190	1	1.27148	1.14488	0.90844	0.248819	0.761144	70.3819	42.2164	0.400181
RIL190_05_1wkf_EM10x1_30s	RIL190	1	2.08284	0.483023	0.286297	0.196525	0.0747402	60.9375	39.1873	0.356926
RIL190_06_1wkf_EM10x1_30s	RIL190	1	1.43957	0.700567	0.485495	0.215071	0.0857553	50.0976	32.8497	0.344286
RIL190_07_1wkf_EM10x1_30s	RIL190	1	2.02073	0.508882	0.296839	0.211825	0.224298	42.3031	20.3125	0.519834
RIL190_12_1wkf_EM10x1_30s	RIL190	1	1.41272	0.741722	0.530404	0.213631	0.177188	62.5	37.7918	0.395331
RIL19_10_1wkf_10x9300_30	RIL19	1	1.02041	0.981737	0.710105	0.271633	0.0425883	54.7009	22.9698	0.580084
RIL19_2_1wkf_10x9300_30	RIL19	1	1.38219	0.820403	0.570068	0.260169	0.224865	51.4086	30.6459	0.403876
RIL19_3_1wkf_10x9300_30	RIL19	1	1.94429	0.518272	0.253609	0.268759	0.0722873	45.178	26.274	0.418435
RIL19_4_1wkf_10x9300_30	RIL19	1	1.54009	0.649648	0.364294	0.285354	0.0230156	58.9029	30.4697	0.482713
RIL19_5_1wkf_10x9300_30	RIL19	1	1.43902	0.710071	0.47192	0.24373	0.151443	58.6281	24.4581	0.582826
RIL19_6_1wkf_10x9300_30	RIL19	1	1.57344	0.636288	0.379233	0.256856	0.0339292	48.1769	28.6275	0.405784
RIL19_7_1wkf_10x9300_30	RIL19	1	2.66839	0.37939	0.169433	0.209405	0.135582	52.5138	35.0016	0.333478
RIL19_8_1wkf_10x9300_30	RIL19	1	3.1258	0.321201	0.127952	0.193283	0.0644536	55.7838	39.4375	0.293029
RIL19_9_1wkf_10x9300_30	RIL19	1	1.58592	0.635119	0.383086	0.25753	0.0712026	48.3257	25.1812	0.478928
RIL189_1_1wkf_EM10x1_30s	RIL189	1	0.827098	1.2198	0.936951	0.297462	0.0852	72.1991	33.9078	0.530357
RIL189_2_1wkf_EM10x1_30s	RIL189	1	0.580558	1.73262	1.41557	0.312405	0.0785378	50.3267	33.9783	0.324845
RIL189_3_1wkf_EM10x1_30s	RIL189	1	1.33944	0.796924	0.497467	0.30742	0.233463	57.255	38.3455	0.330269
RIL189_4_1wkf_EM10x1_30s	RIL189	1	1.02827	0.982701	0.724779	0.271639	0.0843243	38.2986	19.7188	0.485131
RIL189_5_1wkf_EM10x1_30s	RIL189	1	1.70244	0.588416	0.354333	0.234083	0.041825	35.6115	20.811	0.415612
RIL189_6_1wkf_EM10x1_30s	RIL189	1	1.6702	0.603902	0.384288	0.219614	0.101851	66.9456	40.4854	0.395249
RIL189_06_1wkf_EM10x1_30s	RIL189	1	1.36383	0.911265	0.729707	0.203739	0.162035	62.5	35.9715	0.424457
RIL189_02_1wkf_EM10x1_30s	RIL189	1	0.559817	1.87646	1.69957	0.287504	0.235042	60.9575	43.8615	0.280459
RIL189_04_1wkf_EM10x1_30s	RIL189	1	1.9691	0.800225	0.57841	0.208595	1.43851	70.3299	39.0625	0.444582
RIL189_01_1wkf_EM10x1_30s	RIL189	1	1.48665	0.673795	0.477256	0.196539	0.0410094	64.0625	42.3031	0.339659
RIL189_05_1wkf_EM10x1_30s	RIL189	1	1.32826	0.759962	0.555875	0.210489	0.0856635	48.4627	26.6084	0.450951
RIL189_03_1wkf_EM10x1_30s	RIL189	1	1.48041	0.719879	0.49754	0.222339	0.297323	57.8125	40.655	0.296778
RIL187_5_1wkf_EM10x1_30s	RIL187	1	0.568521	2.26762	2.09768	0.235071	1.11585	43.7657	28.5228	0.348283
RIL187_6_1wkf_EM10x1_30s	RIL187	1	1.79538	0.557464	0.371137	0.186327	0.0294985	33.9783	17.5349	0.483937
RIL187_3_1wkf_EM10x1_30s	RIL187	1	1.64322	0.652839	0.447872	0.21528	0.18223	37.3337	27.3669	0.266966
RIL187_1_1wkf_EM10x1_30s	RIL187	1	1.23644	0.812253	0.548961	0.263292	0.06443	35.0016	23.0737	0.340781
RIL187_2_1wkf_EM10x1_30s	RIL187	1	1.02592	0.984285	0.77102	0.226722	0.0809921	32.8322	22.9698	0.300389
RIL187_8_1wkf_EM10x1_30s	RIL187	1	0.882486	1.18513	1.00454	0.211371	0.142708	25.1574	19.6884	0.217391
RIL187_4_1wkf_EM10x1_30s	RIL187	1	1.85688	0.575942	0.318555	0.257388	0.272044	26.4555	12.0318	0.545206
RIL187_9_1wkf_EM10x1_30s	RIL187	1	1.01358	1.0636	0.900956	0.177757	0.235056	23.203	15.3132	0.340034
RIL187_10_1wkf_EM10x1_30s	RIL187	1	0.83834	1.20155	0.971142	0.224978	0.0846426	29.5528	18.5946	0.370802
RIL187_7_1wkf_EM10x1_30s	RIL187	1	1.77104	0.565279	0.367975	0.199429	0.0329724	29.5528	16.5522	0.439912
RIL186_1_1wkf_10x9300_30	RIL186	1	0.947123	1.15493	0.940941	0.239616	0.223203	56.9197	26.2512	0.538803
RIL186_2_1wkf_10x9300_30	RIL186	1	1.11718	1.13882	0.845596	0.293227	0.489673	56.9197	29.5326	0.481153
RIL186_3_1wkf_10x9300_30	RIL186	1	0.88634	1.35678	1.03294	0.299994	0.528205	56.9197	27.5412	0.516139
RIL186_5_1wkf_10x9300_30	RIL186	1	2.19867	0.508372	0.248502	0.257523	0.599781	62.9577	35.0187	0.443774
RIL186_6_1wkf_10x9300_30	RIL186	1	1.85187	0.56514	0.354588	0.210551	0.187393	71.1054	47.0461	0.338361
RIL186_7_1wkf_10x9300_30	RIL186	1	1.16267	0.920055	0.663734	0.267019	0.291695	56.8776	30.7044	0.460167
RIL186_8_1wkf_10x9300_30	RIL186	1	2.36896	0.432901	0.184945	0.249033	0.168469	74.3784	39.3768	0.470588
RIL186_02_1wkf_EM10x1_30s	RIL186	1	1.56426	0.640428	0.435232	0.205196	0.0438511	40.655	25.1946	0.380285
RIL186_06_1wkf_EM10x1_30s	RIL186	1	1.23668	0.809148	0.620062	0.189343	0.0256022	53.148	37.63	0.291977
RIL186_03_1wkf_EM10x1_30s	RIL186	1	2.6311	0.400497	0.196719	0.203778	0.288594	40.745	25.0488	0.385231
RIL186_01_1wkf_EM10x1_30s	RIL186	1	1.36167	0.760473	0.534725	0.227974	0.254	43.7779	26.5625	0.393244
RIL186_04_1wkf_EM10x1_30s	RIL186	1	0.841799	1.21716	1.00893	0.229914	0.148816	45.3394	28.1684	0.378722
RIL186_05_1wkf_EM10x1_30s	RIL186	1	2.78134	0.362799	0.189698	0.1731	0.0941952	45.4201	25	0.449583
RIL185_1_1wkf_10x9300_30	RIL185	1	1.93492	0.553362	0.282368	0.272302	0.244457	54.7337	35.274	0.355535
RIL185_2_1wkf_10x9300_30	RIL185	1	0.587824	1.76191	1.36669	0.309957	0.217279	43.752	26.274	0.399479
RIL185_3_1wkf_10x9300_30	RIL185	1	0.731104	1.42011	1.16137	0.278202	0.254075	70.0374	40.7064	0.41879
RIL185_4_1wkf_10x9300_30	RIL185	1	1.19017	0.843242	0.611211	0.235605	0.0599512	71.1054	38.2986	0.461382
RIL185_5_1wkf_10x9300_30	RIL185	1	1.77527	0.57689	0.365634	0.210978	0.144359	83.2439	47.1477	0.433619
RIL185_6_1wkf_10x9300_30	RIL185	1	3.33117	0.312141	0.0901346	0.22202	0.438073	54.4928	31.8895	0.414794
RIL185_05_1wkf_EM10x1_30s	RIL185	1	1.24992	0.841307	0.654717	0.202346	0.164463	73.4541	46.9791	0.36043
RIL185_03_1wkf_EM10x1_30s	RIL185	1	1.32322	0.806765	0.604876	0.209449	0.19602	75.1463	37.5	0.500974
RIL185_06_1wkf_EM10x1_30s	RIL185	1	0.823881	1.28201	1.11461	0.202995	0.19006	57.8336	37.63	0.349341
RIL185_02_1wkf_EM10x1_30s	RIL185	1	2.05231	0.488376	0.269585	0.22085	0.0434736	67.2057	46.9791	0.300966
RIL185_04_1wkf_EM10x1_30s	RIL185	1	1.0335	0.96861	0.771145	0.198487	0.0327762	42.2164	23.4895	0.443593
RIL184_1_1wkf_10x9300_30	RIL184	1	1.48141	0.692901	0.447884	0.253633	0.14377	31.7202	18.6267	0.41278
RIL184_2_1wkf_10x9300_30	RIL184	1	1.51432	0.695822	0.48552	0.221869	0.185841	28.4598	17.5349	0.38387
RIL184_3_1wkf_10x9300_30	RIL184	1	1.13894	0.931909	0.720519	0.231104	0.184248	27.345	17.5008	0.36
RIL184_4_1wkf_10x9300_30	RIL184	1	1.83977	0.585967	0.391603	0.199183	0.229654	29.5326	20.7822	0.296296
RIL184_6_1wkf_10x9300_30	RIL184	1	1.6505	0.65024	0.467144	0.183017	0.211453	32.8322	25.2523	0.230867
RIL184_7_1wkf_10x9300_30	RIL184	1	1.228	0.84581	0.550784	0.30198	0.170255	37.2535	22.9958	0.38272
RIL184_04_1wkf_EM10x1_30s	RIL184	1	1.54068	0.651601	0.384603	0.266243	0.0636532	42.1875	26.5625	0.37037
RIL184_02_1wkf_EM10x1_30s	RIL184	1	0.708165	2.39969	2.28264	0.304565	0.921074	43.7779	28.1684	0.356562
RIL184_03_1wkf_EM10x1_30s	RIL184	1	1.5748	0.679558	0.425768	0.274102	0.297371	50.0244	29.6875	0.40654
RIL184_01_1wkf_EM10x1_30s	RIL184	1	0.955244	1.17461	0.860464	0.331448	0.595438	50.0244	28.125	0.437774
RIL182_1_1wkf_10x9300_30	RIL182	1	1.4891	0.672529	0.434578	0.240637	0.0365091	41.6219	24.1628	0.419469
RIL182_2_1wkf_10x9300_30	RIL182	1	0.780504	1.28565	1.01155	0.274099	0.0589157	57.0456	29.5528	0.481944
RIL182_3_1wkf_10x9300_30	RIL182	1	0.566368	1.78918	1.49037	0.311733	0.111635	49.2696	31.7955	0.354662
RIL182_4_1wkf_10x9300_30	RIL182	1	1.63431	0.613533	0.392847	0.222607	0.0495319	32.8322	21.876	0.333703
RIL182_5_1wkf_10x9300_30	RIL182	1	1.93351	0.522713	0.347409	0.175303	0.0926455	44.9657	22.9698	0.489171
RIL182_7_1wkf_10x9300_30	RIL182	1	1.0688	0.975139	0.739876	0.241599	0.188279	51.9756	27.3669	0.473467
RIL182_8_1wkf_10x9300_30	RIL182	1	0.751069	2.23978	2.14883	0.263464	0.875653	63.4498	37.2535	0.412867
RIL182_9_1wkf_10x9300_30	RIL182	1	1.32244	0.760756	0.581035	0.179721	0.075585	69.1261	39.3768	0.430363
RIL181_1_1wkf_10x9300_30	RIL181	1	1.04256	0.969743	0.701246	0.265958	0.115791	64.6176	29.5528	0.54265
RIL181_2_1wkf_10x9300_30	RIL181	1	1.60394	0.63094	0.411272	0.219668	0.0874463	47.0461	21.876	0.535009
RIL181_3_1wkf_10x9300_30	RIL181	1	0.988926	1.03015	0.7755	0.254646	0.141424	62.9577	44.6185	0.291294
RIL181_4_1wkf_10x9300_30	RIL181	1	1.26401	1.41833	0.828041	0.296085	2.22097	56.1685	37.3337	0.335327
RIL181_5_1wkf_10x9300_30	RIL181	1	0.783989	1.34536	1.07756	0.28294	0.242231	71.1727	32.814	0.538952
RIL181_6_1wkf_10x9300_30	RIL181	1	1.48682	0.67344	0.438316	0.237143	0.0351468	56.0512	29.7143	0.469872
RIL181_7_1wkf_10x9300_30	RIL181	1	1.14529	0.883233	0.634409	0.254837	0.113409	60.4071	30.6459	0.492677
RIL181_05_1wkf_EM10x1_30s	RIL181	1	1.04013	1.13447	0.910639	0.247092	0.310975	84.3895	45.3125	0.463055
RIL181_06_1wkf_EM10x1_30s	RIL181	1	1.95741	0.515519	0.326135	0.193811	0.0741595	67.4776	44.0004	0.347926
RIL181_03_1wkf_EM10x1_30s	RIL181	1	1.71226	0.613874	0.369069	0.249524	0.195486	54.7098	34.4105	0.371036
RIL181_01_1wkf_EM10x1_30s	RIL181	1	1.70179	0.598871	0.343631	0.259469	0.119127	70.4686	43.8615	0.377574
RIL181_02_1wkf_EM10x1_30s	RIL181	1	1.13923	0.879235	0.689181	0.179075	0.0395471	75.1463	48.4375	0.355424
RIL181_04_1wkf_EM10x1_30s	RIL181	1	2.22179	0.453324	0.283226	0.17366	0.0623244	70.5897	42.3031	0.400719
RIL180_3_1wkf_EM10x1_30s	RIL180	1	2.16933	0.487581	0.278615	0.213336	0.330953	26.274	21.0397	0.19922
RIL180_8_1wkf_EM10x1_30s	RIL180	1	0.638172	1.57037	1.38102	0.188874	0.0465272	33.9783	18.6267	0.451805
RIL180_5_1wkf_EM10x1_30s	RIL180	1	1.21052	0.842996	0.631315	0.211681	0.187278	43.7657	26.274	0.399667
RIL180_6_1wkf_EM10x1_30s	RIL180	1	2.5919	0.387944	0.232497	0.157656	0.0607047	34.0662	20.811	0.389102
RIL180_1_1wkf_EM10x1_30s	RIL180	1	1.0568	0.956087	0.701415	0.267088	0.0852923	27.345	20.811	0.238948
RIL180_7_1wkf_EM10x1_30s	RIL180	1	1.06045	0.943649	0.749432	0.19541	0.0262302	36.112	18.5946	0.485085
RIL180_11_1wkf_EM10x1_30s	RIL180	1	0.83214	1.29393	1.10545	0.219256	0.189764	41.5644	27.3669	0.341579
RIL180_2_1wkf_EM10x1_30s	RIL180	1	1.11063	1.55077	1.36638	0.224181	0.5226	26.274	14.2614	0.457204
RIL180_9_1wkf_EM10x1_30s	RIL180	1	0.79411	1.27055	1.0721	0.217846	0.082134	41.6219	30.7044	0.262302
RIL180_10_1wkf_EM10x1_30s	RIL180	1	1.42801	0.727131	0.523927	0.203809	0.156221	28.4598	16.407	0.423503
RIL180_12_1wkf_EM10x1_30s	RIL180	1	1.42798	0.713737	0.528055	0.196031	0.0927621	24.0884	15.3522	0.362673
RIL180_4_1wkf_EM10x1_30s	RIL180	1	1.40524	0.867845	0.663762	0.220604	0.359034	30.0347	18.7228	0.376627
RIL18_01_1wkf_10x9300_30	RIL18	1	1.56285	0.642859	0.414322	0.228537	0.0691609	60.9591	48.5726	0.203194
RIL18_02_1wkf_10x9300_30	RIL18	1	1.34299	0.746455	0.533895	0.216984	0.0459616	75.757	32.9777	0.564692
RIL18_03_1wkf_10x9300_30	RIL18	1	2.24828	0.445195	0.243672	0.20154	0.0309278	52.7865	27.4324	0.480315
RIL18_04_1wkf_10x9300_30	RIL18	1	1.5888	0.671239	0.444859	0.229348	0.129246	55.8802	31.8895	0.429325
RIL18_05_1wkf_10x9300_30	RIL18	1	1.5776	0.63572	0.393882	0.24577	0.0488112	54.8647	31.8895	0.418762
RIL18_06_1wkf_10x9300_30	RIL18	1	0.962884	1.09161	0.880081	0.238337	0.22918	50.4217	24.0884	0.52226
RIL18_07_1wkf_10x9300_30	RIL18	1	1.27658	0.896316	0.641215	0.255101	0.631595	70.2165	37.2053	0.470135
RIL18_08_1wkf_10x9300_30	RIL18	1	1.58178	0.925807	0.680655	0.248061	1.59429	45.9526	21.9851	0.52157
RIL18_09_1wkf_10x9300_30	RIL18	1	0.783673	1.28959	1.06789	0.246715	0.102246	101.464	67.9214	0.330589
RIL18_10_1wkf_10x9300_30	RIL18	1	2.36274	0.539705	0.281123	0.258582	1.20837	62.2217	36.8985	0.406983
RIL179_10_1wkf_EM10x1_30s	RIL179	1	1.35928	0.795448	0.52367	0.271778	0.242663	49.221	27.345	0.444444
RIL179_1_1wkf_EM10x1_30s	RIL179	1	1.15753	0.876979	0.653396	0.237119	0.0933639	48.7324	31.7391	0.348708
RIL179_2_1wkf_EM10x1_30s	RIL179	1	1.83193	0.552126	0.304495	0.25322	0.0833409	30.8017	20.7822	0.32529
RIL179_3_1wkf_EM10x1_30s	RIL179	1	1.07756	0.999553	0.769549	0.255144	0.161541	44.8991	24.0884	0.463499
RIL179_4_1wkf_EM10x1_30s	RIL179	1	1.49181	0.724785	0.430255	0.302433	0.250712	44.2415	27.6928	0.374053
RIL179_5_1wkf_EM10x1_30s	RIL179	1	0.594471	1.72272	1.49912	0.243638	0.159344	50.3623	31.7391	0.369786
RIL179_6_1wkf_EM10x1_30s	RIL179	1	2.01526	0.502485	0.306548	0.200402	0.103984	32.8868	18.5946	0.434588
RIL179_7_1wkf_EM10x1_30s	RIL179	1	1.39898	0.721707	0.47396	0.247747	0.0824143	34.0662	25.1812	0.260817
RIL179_8_1wkf_EM10x1_30s	RIL179	1	1.72746	0.579674	0.370409	0.208768	0.0366737	30.6264	19.8096	0.353187
RIL179_9_1wkf_EM10x1_30s	RIL179	1	1.56237	0.641521	0.413446	0.230692	0.047168	42.7143	29.5528	0.308127
RIL178_1_1wkf_EM10x1_30s	RIL178	1	0.965842	1.12938	0.887357	0.253086	0.241676	31.8895	25.1812	0.210361
RIL178_9_1wkf_EM10x1_30s	RIL178	1	1.60845	0.632763	0.471058	0.169535	0.0883871	27.4324	17.5008	0.362038
RIL178_6_1wkf_EM10x1_30s	RIL178	1	0.923587	1.0917	0.911225	0.195373	0.0771415	32.814	21.9033	0.332501
RIL178_3_1wkf_EM10x1_30s	RIL178	1	1.14228	0.93342	0.668539	0.264881	0.145904	35.1551	21.876	0.377729
RIL178_5_1wkf_EM10x1_30s	RIL178	1	1.30281	0.813095	0.613183	0.199912	0.212362	31.7955	20.811	0.345475
RIL178_8_1wkf_EM10x1_30s	RIL178	1	1.14936	0.870516	0.664673	0.207118	0.0232967	39.392	20.7822	0.472426
RIL178_7_1wkf_EM10x1_30s	RIL178	1	0.861176	1.21973	1.02837	0.225234	0.140858	50.6112	24.0636	0.52454
RIL178_2_1wkf_EM10x1_30s	RIL178	1	1.04184	0.977178	0.743202	0.233975	0.109928	28.4598	22.9958	0.19199
RIL178_4_1wkf_EM10x1_30s	RIL178	1	1.06772	0.951814	0.771748	0.19542	0.0949362	43.752	28.4388	0.35
RIL176_10_1wkf_EM10x1_30s	RIL176	1	1.29458	0.792959	0.562142	0.230044	0.114727	65.71	39.6191	0.397061
RIL176_1_1wkf_EM10x1_30s	RIL176	1	1.20034	0.834619	0.630307	0.205769	0.0426068	48.1396	26.274	0.454213
RIL176_2_1wkf_EM10x1_30s	RIL176	1	1.06165	0.962093	0.725951	0.239401	0.125246	65.9553	39.3768	0.402978
RIL176_3_1wkf_EM10x1_30s	RIL176	1	1.12212	0.909228	0.692463	0.232263	0.102336	45.9396	31.7202	0.309524
RIL176_4_1wkf_EM10x1_30s	RIL176	1	2.70903	0.380136	0.191194	0.191393	0.252052	49.5239	31.8895	0.356079
RIL176_5_1wkf_EM10x1_30s	RIL176	1	1.49312	0.680076	0.403431	0.279801	0.171585	85.5684	40.4706	0.527038
RIL176_6_1wkf_EM10x1_30s	RIL176	1	1.88948	0.530182	0.326595	0.205435	0.0407456	63.4781	35.0187	0.448334
RIL176_7_1wkf_EM10x1_30s	RIL176	1	1.27846	0.801565	0.576616	0.227512	0.141769	57.9714	33.9078	0.415094
RIL176_8_1wkf_EM10x1_30s	RIL176	1	0.982077	1.03176	0.794643	0.25619	0.0922899	71.1727	30.7044	0.568593
RIL176_9_1wkf_EM10x1_30s	RIL176	1	2.15165	0.465718	0.27263	0.193663	0.0453286	38.2986	27.4324	0.283725
RIL175_4_1wkf_EM10x1_30s	RIL175	1	2.94811	0.33985	0.17226	0.168628	0.0413308	44.8458	24.0636	0.463415
RIL175_7_1wkf_EM10x1_30s	RIL175	1	2.40497	0.417711	0.263793	0.156343	0.0537218	39.392	21.9033	0.443965
RIL175_1_1wkf_EM10x1_30s	RIL175	1	0.961375	1.17014	0.976708	0.204454	0.219339	53.6966	32.8322	0.38856
RIL175_12_1wkf_EM10x1_30s	RIL175	1	3.14124	0.34438	0.160258	0.18332	0.395361	41.6937	28.4388	0.317912
RIL175_8_1wkf_EM10x1_30s	RIL175	1	0.969244	1.04071	0.862523	0.192671	0.0756835	43.8067	26.274	0.400229
RIL175_2_1wkf_EM10x1_30s	RIL175	1	1.31422	0.933512	0.733437	0.210563	0.356973	37.2053	21.9851	0.409086
RIL175_10_1wkf_EM10x1_30s	RIL175	1	2.00319	0.499913	0.32425	0.175672	0.0380971	42.6722	26.274	0.384284
RIL175_5_1wkf_EM10x1_30s	RIL175	1	1.43972	0.700124	0.489323	0.210801	0.0864963	38.2986	19.8096	0.48276
RIL175_6_1wkf_EM10x1_30s	RIL175	1	1.53208	0.660874	0.475714	0.188945	0.0934782	41.794	22.9698	0.450405
RIL175_11_1wkf_EM10x1_30s	RIL175	1	1.91893	0.599692	0.405585	0.195502	0.335084	49.2696	29.5326	0.400592
RIL175_3_1wkf_EM10x1_30s	RIL175	1	1.33165	0.79853	0.59287	0.20566	0.218593	48.1272	27.3669	0.431364
RIL175_9_1wkf_EM10x1_30s	RIL175	1	2.90893	0.357096	0.170515	0.187161	0.360578	41.6937	25.1812	0.396044
RIL174_1_1wkf_EM10x1_30s	RIL174	1	0.623777	1.72818	1.46363	0.264548	0.233702	58.0642	37.2053	0.359239
RIL174_2_1wkf_EM10x1_30s	RIL174	1	1.3617	0.742394	0.554304	0.191144	0.103053	61.2919	35.0016	0.428936
RIL174_3_1wkf_EM10x1_30s	RIL174	1	1.71669	0.591523	0.420681	0.175455	0.157108	61.4965	29.8549	0.514526
RIL174_4_1wkf_EM10x1_30s	RIL174	1	1.40198	0.721672	0.520284	0.201388	0.11674	48.1769	26.274	0.454635
RIL174_5_1wkf_EM10x1_30s	RIL174	1	1.49502	0.670107	0.496554	0.177002	0.0391437	55.8802	29.5326	0.471502
RIL174_6_1wkf_EM10x1_30s	RIL174	1	1.29264	0.830967	0.642581	0.207925	0.143475	77.6598	38.4234	0.505235
RIL174_7_1wkf_EM10x1_30s	RIL174	1	1.42977	0.69968	0.536987	0.162693	0.020221	53.6074	29.5528	0.448717
RIL174_8_1wkf_EM10x1_30s	RIL174	1	2.04074	0.496738	0.335771	0.16574	0.0790844	56.8881	31.7955	0.441086
RIL174_9_1wkf_EM10x1_30s	RIL174	1	1.57816	0.650171	0.463591	0.195277	0.118519	66.7218	42.6582	0.360656
RIL173_10_1wkf_EM10x1_30s	RIL173	1	1.49798	0.680685	0.413736	0.268898	0.158978	39.0937	25	0.360511
RIL173_1_1wkf_EM10x1_30s	RIL173	1	3.01218	0.344018	0.136651	0.207989	0.153119	45.3394	25	0.448604
RIL173_2_1wkf_EM10x1_30s	RIL173	1	1.46802	0.744054	0.518472	0.236324	0.229254	64.2338	35.9375	0.44052
RIL173_3_1wkf_EM10x1_30s	RIL173	1	1.95958	0.515949	0.295457	0.222942	0.13628	37.5325	18.815	0.498702
RIL173_4_1wkf_EM10x1_30s	RIL173	1	1.01727	0.984959	0.705669	0.27929	0.04487	59.4572	32.8125	0.448132
RIL173_5_1wkf_EM10x1_30s	RIL173	1	1.23711	0.83627	0.616078	0.2354	0.122151	67.3508	51.5625	0.234419
RIL173_6_1wkf_EM10x1_30s	RIL173	1	0.748459	1.40762	1.20513	0.255548	0.188364	45.3125	28.125	0.37931
RIL173_7_1wkf_EM10x1_30s	RIL173	1	1.21066	0.826695	0.588106	0.238589	0.0363889	67.2601	34.375	0.488925
RIL173_8_1wkf_EM10x1_30s	RIL173	1	1.45217	0.690908	0.454656	0.237396	0.0582235	51.7751	32.8497	0.365532
RIL173_9_1wkf_EM10x1_30s	RIL173	1	1.27922	0.785783	0.515948	0.268722	0.0735673	50	25.1946	0.496109
RIL172_11_1wkf_EM10x1_30s	RIL172	1	2.14955	0.470265	0.323215	0.14705	0.102086	38.3455	19.8096	0.483392
RIL172_5_1wkf_EM10x1_30s	RIL172	1	1.05318	0.994719	0.783409	0.219095	0.150585	27.345	17.5008	0.36
RIL172_4_1wkf_EM10x1_30s	RIL172	1	0.775143	1.43271	1.20102	0.219923	0.180293	33.9783	15.3522	0.548176
RIL172_7_1wkf_EM10x1_30s	RIL172	1	0.816294	1.39871	1.17696	0.22175	0.313019	37.1892	20.897	0.438089
RIL172_1_1wkf_EM10x1_30s	RIL172	1	1.65783	0.61345	0.439213	0.1797	0.10934	39.3768	24.0884	0.388258
RIL172_2_1wkf_EM10x1_30s	RIL172	1	0.740855	1.38764	1.20066	0.215112	0.146736	40.8385	28.4598	0.303112
RIL172_10_1wkf_EM10x1_30s	RIL172	1	1.14428	0.876756	0.691031	0.19171	0.0546571	39.392	24.0636	0.389125
RIL172_9_1wkf_EM10x1_30s	RIL172	1	2.32787	0.430572	0.256346	0.175859	0.0447299	36.5074	26.3422	0.278442
RIL172_3_1wkf_EM10x1_30s	RIL172	1	1.73367	0.579124	0.404373	0.17475	0.0635251	49.4151	27.3669	0.446184
RIL172_6_1wkf_EM10x1_30s	RIL172	1	1.45051	0.693797	0.467495	0.228484	0.0800254	30.6459	19.6884	0.357552
RIL172_8_1wkf_EM10x1_30s	RIL172	1	1.84095	0.545842	0.355503	0.194267	0.0562066	34.0662	20.811	0.389102
RIL171_5_1wkf_EM10x1_30s	RIL171	1	0.451665	2.27601	2.06765	0.230631	0.202862	43.7657	24.0636	0.450172
RIL171_11_1wkf_EM10x1_30s	RIL171	1	0.836576	1.40603	1.23615	0.204513	0.436281	40.4854	23.0737	0.430072
RIL171_2_1wkf_EM10x1_30s	RIL171	1	2.16341	0.467528	0.303622	0.164403	0.0987019	35.0699	20.811	0.406586
RIL171_4_1wkf_EM10x1_30s	RIL171	1	0.723102	1.7118	1.52179	0.185423	0.303922	37.2053	20.897	0.438332
RIL171_8_1wkf_EM10x1_30s	RIL171	1	0.796452	1.26872	1.10188	0.182291	0.0970633	45.9526	29.5326	0.357325
RIL171_7_1wkf_EM10x1_30s	RIL171	1	0.776128	1.50806	1.35214	0.218501	0.24726	49.2696	26.3422	0.465346
RIL171_1_1wkf_EM10x1_30s	RIL171	1	0.941215	1.24125	1.07217	0.213753	0.175064	47.0461	27.345	0.418762
RIL171_6_1wkf_EM10x1_30s	RIL171	1	1.75337	0.817069	0.523359	0.211644	1.38167	45.9917	22.9698	0.500566
RIL171_3_1wkf_EM10x1_30s	RIL171	1	0.410285	2.60398	2.44113	0.212088	0.346656	41.9227	29.5528	0.295063
RIL171_10_1wkf_EM10x1_30s	RIL171	1	1.6061	0.623921	0.438288	0.186887	0.045155	40.4854	21.876	0.459657
RIL171_9_1wkf_EM10x1_30s	RIL171	1	0.735605	1.42166	1.26818	0.195862	0.141259	48.5726	30.7044	0.367865
RIL170_10_1wkf_EM10x1_30s	RIL170	1	1.97611	0.535219	0.252092	0.283127	0.424924	61.0176	32.8497	0.461636
RIL170_11_1wkf_EM10x1_30s	RIL170	1	1.46218	0.689578	0.356943	0.332115	0.113082	59.703	40.625	0.319549
RIL170_1_1wkf_EM10x1_30s	RIL170	1	0.954671	1.05103	0.653055	0.397653	0.0583317	54.6875	34.4105	0.37078
RIL170_2_1wkf_EM10x1_30s	RIL170	1	1.20347	0.866616	0.578937	0.303886	0.176598	64.2338	35.9375	0.44052
RIL170_4_1wkf_EM10x1_30s	RIL170	1	2.24586	0.446015	0.254797	0.191694	0.0407089	79.7488	43.75	0.451402
RIL170_5_1wkf_EM10x1_30s	RIL170	1	1.47526	0.685881	0.444267	0.241615	0.15408	64.2338	35.9715	0.439992
RIL170_6_1wkf_EM10x1_30s	RIL170	1	1.21628	0.846643	0.527454	0.31919	0.240323	72.0277	43.7779	0.392207
RIL170_9_1wkf_EM10x1_30s	RIL170	1	1.02802	0.990994	0.699468	0.307898	0.103036	76.5784	45.3125	0.408286
RIL169_1_1wkf_10x9300_30	RIL169	1	1.19587	1.18529	0.841138	0.344153	0.816362	61.2919	36.0954	0.41109
RIL169_5_1wkf_10x9300_30	RIL169	1	1.65899	0.843206	0.580609	0.274586	1.86477	67.9566	40.4706	0.404464
RIL169_2_1wkf_10x9300_30	RIL169	1	2.42135	0.417653	0.233361	0.184292	0.132206	79.9672	41.6219	0.479512
RIL169_3_1wkf_10x9300_30	RIL169	1	0.845788	1.27461	1.00353	0.26388	0.228304	62.586	35.1551	0.438292
RIL169_06_1wkf_EM10x1_30s	RIL169	1	1.77786	0.574642	0.369116	0.212607	0.0949499	48.4627	32.8497	0.322166
RIL169_02_1wkf_EM10x1_30s	RIL169	1	1.73366	0.582541	0.383187	0.202856	0.0936082	54.7767	28.125	0.486552
RIL169_10_1wkf_EM10x1_30s	RIL169	1	0.793594	1.28949	1.06607	0.223413	0.147906	78.125	50	0.36
RIL169_12_1wkf_EM10x1_30s	RIL169	1	1.83078	0.547517	0.375429	0.172087	0.0484788	59.3956	35.9375	0.394946
RIL169_08_1wkf_EM10x1_30s	RIL169	1	1.28925	1.20576	1.06385	0.186238	0.247277	55.0435	34.4105	0.374849
RIL169_05_1wkf_EM10x1_30s	RIL169	1	1.99873	0.509407	0.321623	0.187784	0.121969	39.1873	26.5625	0.322166
RIL169_11_1wkf_EM10x1_30s	RIL169	1	1.2916	0.904247	0.732749	0.190621	0.34362	65.6994	43.75	0.334088
RIL169_03_1wkf_EM10x1_30s	RIL169	1	2.47367	0.408085	0.214292	0.196715	0.0789151	62.5195	39.0625	0.375195
RIL169_07_1wkf_EM10x1_30s	RIL169	1	1.79268	0.558835	0.383432	0.178011	0.0388315	79.6875	48.4627	0.391841
RIL169_01_1wkf_EM10x1_30s	RIL169	1	1.2335	1.80863	1.59884	0.256336	1.89339	51.6571	34.6931	0.328396
RIL169_04_1wkf_EM10x1_30s	RIL169	1	1.25115	0.927432	0.710534	0.226407	0.297796	59.375	42.4471	0.285101
RIL169_09_1wkf_EM10x1_30s	RIL169	1	1.14873	0.975053	0.757497	0.227232	0.294274	51.5862	25	0.515374
RIL167_03_1wkf_EM10x1_30s	RIL167	1	0.760868	1.46412	1.22383	0.251709	0.378804	56.3367	37.5325	0.333782
RIL167_07_1wkf_EM10x1_30s	RIL167	1	1.34391	0.782351	0.567282	0.226231	0.190018	70.9347	58.838	0.170533
RIL167_05_1wkf_EM10x1_30s	RIL167	1	0.927428	1.34997	1.15737	0.220688	0.322859	65.6994	43.7779	0.333663
RIL167_09_1wkf_EM10x1_30s	RIL167	1	1.19512	0.844762	0.631067	0.223583	0.0815345	54.888	28.1684	0.486803
RIL167_08_1wkf_EM10x1_30s	RIL167	1	0.999303	1.05776	0.831123	0.243247	0.17908	75.0163	45.3125	0.395964
RIL167_11_1wkf_EM10x1_30s	RIL167	1	1.11881	1.11366	0.867371	0.260237	0.468613	75.0163	40.655	0.45805
RIL167_02_1wkf_EM10x1_30s	RIL167	1	0.650898	1.68911	1.50532	0.253742	0.275391	81.25	50.0244	0.384315
RIL167_10_1wkf_EM10x1_30s	RIL167	1	1.81882	0.617645	0.347249	0.270395	0.356011	68.7678	42.2164	0.386101
RIL167_06_1wkf_EM10x1_30s	RIL167	1	0.896833	1.2648	1.04957	0.248885	0.26732	57.8336	34.4105	0.405009
RIL167_01_1wkf_EM10x1_30s	RIL167	1	1.00604	1.29437	1.07863	0.262639	0.435756	71.875	46.901	0.347464
RIL167_04_1wkf_EM10x1_30s	RIL167	1	1.59543	0.76287	0.535406	0.231093	0.38854	67.1875	46.901	0.301938
RIL165_05_1wkf_EM10x1_30s	RIL165	1	2.32828	0.43215	0.205567	0.229244	0.0642132	51.6571	25.0488	0.515095
RIL165_02_1wkf_EM10x1_30s	RIL165	1	0.785808	1.28067	1.05101	0.22985	0.0810678	50.0244	28.1684	0.436907
RIL165_08_1wkf_EM10x1_30s	RIL165	1	0.989119	1.0151	0.779711	0.235393	0.062107	56.25	31.25	0.444444
RIL165_01_1wkf_EM10x1_30s	RIL165	1	0.749719	1.39779	1.15616	0.247833	0.183023	37.63	26.6084	0.292893
RIL165_11_1wkf_EM10x1_30s	RIL165	1	3.17121	0.318349	0.155783	0.162529	0.130578	51.5625	28.1684	0.453704
RIL165_03_1wkf_EM10x1_30s	RIL165	1	2.14835	0.70581	0.454786	0.236828	1.42627	51.7751	31.25	0.396428
RIL165_06_1wkf_EM10x1_30s	RIL165	1	1.85003	0.541088	0.327841	0.213247	0.0324007	62.6755	37.7918	0.397024
RIL165_07_1wkf_EM10x1_30s	RIL165	1	3.88982	0.25833	0.112113	0.146217	0.0951178	56.3367	26.5625	0.528505
RIL165_09_1wkf_EM10x1_30s	RIL165	1	2.96815	0.339616	0.151805	0.189783	0.0765869	75.1463	42.1875	0.438595
RIL165_12_1wkf_EM10x1_30s	RIL165	1	2.00574	0.527969	0.318797	0.209528	0.224788	53.125	32.8125	0.382353
RIL165_04_1wkf_EM10x1_30s	RIL165	1	1.03506	1.01079	0.797953	0.235766	0.132367	54.7767	39.0937	0.286307
RIL165_10_1wkf_EM10x1_30s	RIL165	1	1.55725	0.694784	0.503675	0.191334	0.250998	48.4627	37.5325	0.225538
RIL163_04_1wkf_EM10x1_30s	RIL163	1	1.52175	0.672457	0.46972	0.205231	0.122208	53.3314	32.8125	0.384743
RIL163_06_1wkf_EM10x1_30s	RIL163	1	3.70281	0.272644	0.101801	0.170843	0.125901	49.0635	29.7286	0.394079
RIL163_11_1wkf_EM10x1_30s	RIL163	1	2.67685	0.37907	0.192079	0.189314	0.144242	45.4201	28.1684	0.379826
RIL163_09_1wkf_EM10x1_30s	RIL163	1	1.88867	0.530714	0.331719	0.200566	0.0474421	75	39.3427	0.47543
RIL163_07_1wkf_EM10x1_30s	RIL163	1	1.82988	0.552435	0.340149	0.217802	0.0741949	46.9791	32.8497	0.300759
RIL163_08_1wkf_EM10x1_30s	RIL163	1	2.88783	0.354651	0.183319	0.171913	0.203725	45.4201	34.4105	0.242396
RIL163_05_1wkf_EM10x1_30s	RIL163	1	2.65614	0.381259	0.197041	0.184219	0.134227	61.2572	34.5168	0.436527
RIL163_02_1wkf_EM10x1_30s	RIL163	1	2.74887	0.364285	0.12723	0.237852	0.0362417	65.6436	40.625	0.381128
RIL163_01_1wkf_EM10x1_30s	RIL163	1	1.05183	0.958464	0.646456	0.314819	0.0923089	73.4375	43.8615	0.402737
RIL163_12_1wkf_EM10x1_30s	RIL163	1	1.52386	0.70033	0.484036	0.214883	0.211366	53.148	29.7286	0.440645
RIL163_03_1wkf_EM10x1_30s	RIL163	1	1.60049	0.627999	0.393813	0.239309	0.0585967	73.504	40.655	0.4469
RIL163_10_1wkf_EM10x1_30s	RIL163	1	2.13084	0.473877	0.289239	0.188726	0.0697548	86.2919	40.655	0.528866
RIL162_11_1wkf_EM10x1_30s	RIL162	1	1.3569	0.741972	0.534196	0.210441	0.0848446	60.9375	29.6875	0.512821
RIL162_01_1wkf_EM10x1_30s	RIL162	1	0.81958	1.22564	0.985864	0.238915	0.0670839	62.5195	39.0937	0.374696
RIL162_02_1wkf_EM10x1_30s	RIL162	1	1.47409	0.686415	0.428836	0.265412	0.0827864	61.1175	31.289	0.488051
RIL162_07_1wkf_EM10x1_30s	RIL162	1	1.93933	0.526182	0.291534	0.237971	0.171002	39.3427	26.9729	0.314412
RIL162_06_1wkf_EM10x1_30s	RIL162	1	2.04974	0.49378	0.292682	0.201099	0.10346	46.9791	25.0488	0.46681
RIL162_10_1wkf_EM10x1_30s	RIL162	1	2.63588	0.399581	0.2175	0.182862	0.235591	34.9386	25.0488	0.283062
RIL162_03_1wkf_EM10x1_30s	RIL162	1	2.11049	0.474741	0.239653	0.235315	0.0436708	53.125	29.7286	0.440403
RIL162_09_1wkf_EM10x1_30s	RIL162	1	1.34051	0.896552	0.654431	0.242121	0.586645	67.2057	40.655	0.395065
RIL162_08_1wkf_EM10x1_30s	RIL162	1	1.84868	0.545861	0.350949	0.199011	0.0777794	35.9715	23.6449	0.342676
RIL162_04_1wkf_EM10x1_30s	RIL162	1	2.89458	0.348097	0.18674	0.163482	0.0640224	51.5862	31.4059	0.391196
RIL162_05_1wkf_EM10x1_30s	RIL162	1	1.23296	0.84097	0.619843	0.221127	0.154424	46.901	25.1946	0.462815
RIL161_10_1wkf_EM10x1_30s	RIL161	1	0.767886	1.70345	1.55475	0.186706	0.981888	35.0187	20.811	0.405718
RIL161_4_1wkf_EM10x1_30s	RIL161	1	0.480714	2.45128	2.30365	0.227804	0.597816	37.2053	24.0884	0.352553
RIL161_7_1wkf_EM10x1_30s	RIL161	1	0.837473	1.39306	1.20727	0.201656	0.738962	48.1396	31.7391	0.340688
RIL161_5_1wkf_EM10x1_30s	RIL161	1	0.930188	1.46111	1.27409	0.21512	1.40511	43.752	27.345	0.375
RIL161_1_1wkf_EM10x1_30s	RIL161	1	0.617849	1.70809	1.49312	0.247178	0.205315	30.7044	20.811	0.322216
RIL161_9_1wkf_EM10x1_30s	RIL161	1	1.41563	0.710713	0.534307	0.176405	0.0676523	37.2053	19.6884	0.470817
RIL161_8_1wkf_EM10x1_30s	RIL161	1	0.749626	1.34214	1.18127	0.17296	0.0767323	42.7143	22.9958	0.461636
RIL161_6_1wkf_EM10x1_30s	RIL161	1	1.70947	0.585535	0.439274	0.147353	0.030667	38.283	29.6135	0.226458
RIL161_3_1wkf_EM10x1_30s	RIL161	1	0.870431	1.16606	0.995216	0.19227	0.0945312	37.7638	20.1687	0.465926
RIL161_2_1wkf_EM10x1_30s	RIL161	1	0.631316	2.20879	2.0757	0.245834	0.933336	35.0187	22.9698	0.34407
RIL160_11_1wkf_EM10x1_30s	RIL160	1	1.51517	0.664618	0.4653	0.205038	0.0675361	51.5862	32.961	0.36105
RIL160_12_1wkf_EM10x1_30s	RIL160	1	0.878188	1.33745	1.12456	0.212882	0.365446	46.9791	31.25	0.33481
RIL160_05_1wkf_EM10x1_30s	RIL160	1	1.19203	0.856177	0.625995	0.23971	0.135016	60.9575	40.655	0.33306
RIL160_07_1wkf_EM10x1_30s	RIL160	1	2.00493	0.514783	0.346408	0.170488	0.191823	60.9575	34.4105	0.435501
RIL160_08_1wkf_EM10x1_30s	RIL160	1	2.10075	0.559223	0.353676	0.209887	0.715036	64.3667	37.7918	0.412866
RIL160_04_1wkf_EM10x1_30s	RIL160	1	2.71349	0.623263	0.454747	0.169091	0.854765	61.0176	40.745	0.332241
RIL160_02_1wkf_EM10x1_30s	RIL160	1	1.36104	0.760182	0.538713	0.22147	0.142165	54.6875	32.8497	0.39932
RIL160_10_1wkf_EM10x1_30s	RIL160	1	1.85321	0.659518	0.423072	0.222374	0.797839	42.2164	28.1684	0.332763
RIL160_03_1wkf_EM10x1_30s	RIL160	1	1.52432	0.710278	0.514166	0.200576	0.171796	35.9375	26.6084	0.259592
RIL160_01_1wkf_EM10x1_30s	RIL160	1	1.51768	0.807592	0.528344	0.227133	0.86214	50.0976	31.25	0.376217
RIL160_09_1wkf_EM10x1_30s	RIL160	1	1.28708	0.827237	0.608685	0.226961	0.206182	45.3394	32.8125	0.276292
RIL160_06_1wkf_EM10x1_30s	RIL160	1	1.26545	0.817892	0.563023	0.254869	0.239777	42.2164	25.1946	0.403205
F8-16_07_1wkf_9300_30s	RIL16	1	2.37465	0.421336	0.276089	0.145888	0.0226099	56.9197	29.6135	0.479731
F8-16_06_1wkf_9300_30s	RIL16	1	2.12357	0.471383	0.299444	0.171939	0.0313939	44.8591	20.7822	0.536723
F8-16_10_1wkf_9300_30s	RIL16	1	1.83101	0.554215	0.400298	0.1554	0.116699	45.6915	32.8868	0.280242
F8-16_05_1wkf_9300_30s	RIL16	1	1.36505	0.900106	0.654354	0.245752	0.5502	51.6987	24.1628	0.532622
F8-16_03_1wkf_9300_30s	RIL16	1	1.63235	0.681394	0.491934	0.190384	0.153125	41.6219	28.4388	0.316735
F8-16_01_1wkf_9300_30s	RIL16	1	2.22578	0.484633	0.23292	0.251713	0.2173	47.4891	23.6119	0.502793
F8-16_04_1wkf_9300_30s	RIL16	1	1.74172	0.580913	0.359364	0.223698	0.106449	36.2442	20.811	0.425813
F8-16_09_1wkf_9300_30s	RIL16	1	1.12086	0.952183	0.719153	0.249412	0.208428	25.3705	18.8819	0.255753
F8-16_11_1wkf_9300_30s	RIL16	1	2.20012	0.455892	0.229427	0.22686	0.0541575	35.1551	20.811	0.408024
F8-16_08_1wkf_9300_30s	RIL16	1	2.69088	0.371694	0.171996	0.199699	0.0136329	47.6525	24.4581	0.486741
F8-16_02_1wkf_9300_30s	RIL16	1	1.02786	0.978158	0.699332	0.285911	0.0693835	57.9198	25.1812	0.565241
RIL159_03_1wkf_EM10x1_30s	RIL159	1	1.38987	0.920771	0.710147	0.228367	1.08488	62.6755	39.3427	0.372279
RIL159_01_1wkf_EM10x1_30s	RIL159	1	0.807881	1.25554	1.00172	0.266978	0.116122	78.125	46.901	0.399667
RIL159_10_1wkf_EM10x1_30s	RIL159	1	2.14668	0.487039	0.278392	0.212856	0.240283	56.25	29.7286	0.471492
RIL159_05_1wkf_EM10x1_30s	RIL159	1	1.91718	0.524358	0.329274	0.197687	0.0736941	57.8336	32.8497	0.431997
RIL159_07_1wkf_EM10x1_30s	RIL159	1	1.57937	0.708304	0.501896	0.214488	0.859639	54.7767	34.4105	0.371804
RIL159_09_1wkf_EM10x1_30s	RIL159	1	0.650177	1.71402	1.46289	0.251132	0.348957	58.0022	40.625	0.299596
RIL159_06_1wkf_EM10x1_30s	RIL159	1	1.82618	0.559188	0.323639	0.235549	0.138408	68.821	48.5382	0.294718
RIL159_08_1wkf_EM10x1_30s	RIL159	1	1.73261	0.581151	0.390704	0.193695	0.0804158	48.5382	26.7457	0.448976
RIL159_11_1wkf_EM10x1_30s	RIL159	1	1.16569	0.880304	0.634201	0.261735	0.122631	65.7922	48.4375	0.26378
RIL159_02_1wkf_EM10x1_30s	RIL159	1	1.54338	0.725118	0.488793	0.245734	0.536285	53.148	32.8497	0.38192
RIL159_04_1wkf_EM10x1_30s	RIL159	1	1.58911	0.6319	0.379093	0.2535	0.0576036	56.2717	34.5168	0.386605
RIL159_12_1wkf_EM10x1_30s	RIL159	1	0.991332	1.07778	0.847497	0.251859	0.238863	71.9429	43.75	0.391879
RIL157_10_1wkf_EM10x1_30s	RIL157	1	2.18976	0.473566	0.274889	0.198207	0.172791	80.4346	40.655	0.494558
RIL157_1_1wkf_EM10x1_30s	RIL157	1	1.75505	0.571334	0.34075	0.230276	0.0525423	54.7098	28.125	0.485924
RIL157_2_1wkf_EM10x1_30s	RIL157	1	1.48881	0.672217	0.450385	0.222804	0.0283903	53.2168	34.4105	0.353391
RIL157_3_1wkf_EM10x1_30s	RIL157	1	1.33709	0.75077	0.50945	0.24132	0.0598405	81.265	40.655	0.499723
RIL157_4_1wkf_EM10x1_30s	RIL157	1	2.1409	0.485617	0.205413	0.278851	0.238584	64.0816	26.6084	0.584773
RIL157_5_1wkf_EM10x1_30s	RIL157	1	0.904878	1.10874	0.846318	0.261487	0.0570499	84.6062	35.9375	0.575238
RIL157_6_1wkf_EM10x1_30s	RIL157	1	1.38698	0.722106	0.46545	0.256657	0.0401208	60.9575	29.7286	0.512307
RIL157_7_1wkf_EM10x1_30s	RIL157	1	2.26175	0.594785	0.42539	0.164985	0.96761	68.9096	40.625	0.41046
RIL157_8_1wkf_EM10x1_30s	RIL157	1	1.2353	0.936202	0.71193	0.224272	0.499063	67.6402	42.2164	0.375868
RIL157_9_1wkf_EM10x1_30s	RIL157	1	1.73726	0.624867	0.414404	0.207693	0.359898	64.3667	29.8515	0.536227
RIL156_5_1wkf_EM10x1_30s	RIL156	1	1.38635	0.736903	0.543147	0.204756	0.0980961	31.7391	18.5946	0.414141
RIL156_7_1wkf_EM10x1_30s	RIL156	1	1.18599	0.847969	0.618662	0.226948	0.0740523	52.5138	26.274	0.499675
RIL156_10_1wkf_EM10x1_30s	RIL156	1	0.694651	1.60767	1.42044	0.207441	0.384382	43.752	22.9958	0.474405
RIL156_4_1wkf_EM10x1_30s	RIL156	1	0.807676	1.40019	1.2032	0.243627	0.37032	47.0334	20.7822	0.55814
RIL156_1_1wkf_EM10x1_30s	RIL156	1	1.53235	0.65638	0.446359	0.210657	0.0729492	37.3337	22.9958	0.384046
RIL156_8_1wkf_EM10x1_30s	RIL156	1	1.30214	0.84388	0.657852	0.199011	0.267082	28.4598	15.4687	0.456474
RIL156_6_1wkf_EM10x1_30s	RIL156	1	1.86524	0.724121	0.525731	0.210684	1.75106	37.2053	25.1812	0.323183
RIL156_3_1wkf_EM10x1_30s	RIL156	1	1.2502	0.807159	0.638124	0.174715	0.0936465	53.7745	25.3705	0.528206
RIL156_11_1wkf_EM10x1_30s	RIL156	1	1.66937	0.601141	0.429555	0.172792	0.0573462	31.7202	15.4687	0.51234
RIL156_2_1wkf_EM10x1_30s	RIL156	1	1.19601	0.916703	0.672652	0.239162	0.259268	35.0187	26.274	0.249716
RIL155_10_1wkf_EM10x1_30s	RIL155	1	0.939102	1.0755	0.841598	0.241625	0.10574	48.4375	29.7286	0.386248
RIL155_11_1wkf_EM10x1_30s	RIL155	1	0.757522	1.37849	1.17321	0.242218	0.170104	65.6436	32.8125	0.500142
RIL155_1_1wkf_EM10x1_30s	RIL155	1	1.69595	0.761273	0.524452	0.246832	0.727038	65.7922	31.289	0.524426
RIL155_2_1wkf_EM10x1_30s	RIL155	1	1.67898	0.599757	0.398237	0.20152	0.0688826	53.2168	34.375	0.354058
RIL155_3_1wkf_EM10x1_30s	RIL155	1	1.30025	0.771903	0.541238	0.230043	0.0592953	59.3956	35.9715	0.394375
RIL155_4_1wkf_EM10x1_30s	RIL155	1	0.818758	1.22622	0.961342	0.268573	0.0639683	73.703	42.2164	0.427209
RIL155_5_1wkf_EM10x1_30s	RIL155	1	1.3523	0.758398	0.500537	0.2693	0.116343	57.8336	42.3031	0.268538
RIL155_6_1wkf_EM10x1_30s	RIL155	1	1.62431	0.624775	0.409273	0.219355	0.0956851	76.5625	48.5382	0.366032
RIL155_7_1wkf_EM10x1_30s	RIL155	1	1.00489	1.03982	0.805698	0.256616	0.163361	61.0176	31.25	0.487852
RIL155_8_1wkf_EM10x1_30s	RIL155	1	1.36075	0.745906	0.504182	0.241724	0.164538	64.3667	40.625	0.36885
RIL155_9_1wkf_EM10x1_30s	RIL155	1	0.687209	1.46285	1.22381	0.251469	0.0711961	61.2572	37.5325	0.387296
RIL154_10_1wkf_EM10x1_30s	RIL154	1	2.55622	0.395723	0.196118	0.201113	0.132604	68.7678	34.375	0.500129
RIL154_11_1wkf_EM10x1_30s	RIL154	1	3.21988	0.313248	0.156361	0.156888	0.110656	50.0244	31.25	0.375305
RIL154_1_1wkf_EM10x1_30s	RIL154	1	2.7012	0.390641	0.174413	0.218364	0.256038	54.6875	39.1873	0.283432
RIL154_2_1wkf_EM10x1_30s	RIL154	1	0.900027	1.2277	1.01151	0.246823	0.222646	53.3314	39.5593	0.258235
RIL154_3_1wkf_EM10x1_30s	RIL154	1	1.66637	0.600483	0.384433	0.216049	0.0253538	62.5195	35.9375	0.42518
RIL154_4_1wkf_EM10x1_30s	RIL154	1	3.01217	0.334381	0.128834	0.206381	0.111571	70.3819	39.0625	0.444992
RIL154_5_1wkf_EM10x1_30s	RIL154	1	2.86894	0.349265	0.162233	0.187032	0.0445788	50	34.5168	0.309665
RIL154_6_1wkf_EM10x1_30s	RIL154	1	1.71074	0.585923	0.382881	0.205741	0.0453206	51.5862	28.1684	0.453955
RIL154_7_1wkf_EM10x1_30s	RIL154	1	1.04182	0.963128	0.745015	0.224742	0.0555756	67.1875	34.4105	0.487844
RIL154_8_1wkf_EM10x1_30s	RIL154	1	1.74449	0.587488	0.37805	0.216919	0.110253	56.2717	37.5325	0.333012
RIL154_9_1wkf_EM10x1_30s	RIL154	1	3.13186	0.320544	0.165708	0.155731	0.0605851	31.25	23.4375	0.25
RIL153_10_1wkf_10x9300_30	RIL153	1	1.39382	0.819211	0.53916	0.280051	0.456152	88.928	48.1769	0.458248
RIL153_11_1wkf_10x9300_30	RIL153	1	1.22625	1.24172	1.03999	0.23802	0.28513	95.7872	44.0925	0.539683
RIL153_1_1wkf_10x9300_30	RIL153	1	1.18133	0.850259	0.571217	0.281491	0.0684699	71.2315	48.1272	0.324355
RIL153_2_1wkf_10x9300_30	RIL153	1	1.79105	0.562554	0.264036	0.303293	0.0671598	67.8949	36.112	0.46812
RIL153_3_1wkf_10x9300_30	RIL153	1	0.628998	1.59584	1.26259	0.366065	0.0640346	81.5156	43.0073	0.472404
RIL153_4_1wkf_10x9300_30	RIL153	1	0.706545	1.5237	1.26647	0.308325	0.270818	73.3743	31.7391	0.567437
RIL153_5_1wkf_10x9300_30	RIL153	1	1.62742	0.622057	0.377247	0.251784	0.080937	73.0147	38.2986	0.475467
RIL153_6_1wkf_10x9300_30	RIL153	1	0.950968	1.0753	0.793162	0.281726	0.214783	68.7094	41.9227	0.389856
RIL153_7_1wkf_10x9300_30	RIL153	1	1.47637	0.682581	0.457224	0.225519	0.0859237	91.8857	63.4498	0.30947
RIL153_8_1wkf_10x9300_30	RIL153	1	2.36943	0.425784	0.211481	0.214092	0.131877	76.6909	35.0699	0.542711
RIL153_9_1wkf_10x9300_30	RIL153	1	1.06145	0.945901	0.7016	0.252635	0.0609613	81.6769	43.0073	0.473445
RIL152_10_1wkf_EM10x1_30s	RIL152	1	2.0724	0.669412	0.479781	0.189631	0.860346	18.6267	12.0814	0.351394
RIL152_11_1wkf_EM10x1_30s	RIL152	1	2.08629	0.518026	0.343825	0.176656	0.251244	33.1044	17.5349	0.470314
RIL152_1_1wkf_EM10x1_30s	RIL152	1	1.2204	0.959872	0.674035	0.262772	0.508935	29.5528	15.3522	0.480517
RIL152_2_1wkf_EM10x1_30s	RIL152	1	0.943415	1.06571	0.849391	0.220946	0.0723872	23.0737	14.2614	0.38192
RIL152_3_1wkf_EM10x1_30s	RIL152	1	0.788461	1.3172	1.11582	0.216399	0.184576	21.9851	16.4434	0.252066
RIL152_4_1wkf_EM10x1_30s	RIL152	1	0.618226	1.7142	1.52539	0.242608	0.217101	31.7202	19.6884	0.37931
RIL152_5_1wkf_EM10x1_30s	RIL152	1	1.72045	0.721152	0.543042	0.187854	1.09549	33.1044	20.7822	0.372222
RIL152_6_1wkf_EM10x1_30s	RIL152	1	0.473281	2.15885	1.9418	0.280469	0.130785	19.7188	10.9926	0.442533
RIL152_7_1wkf_EM10x1_30s	RIL152	1	0.996995	1.03893	0.835985	0.21619	0.160317	38.3455	20.811	0.457277
RIL152_8_1wkf_EM10x1_30s	RIL152	1	0.885648	1.19054	0.968193	0.229911	0.245216	36.2442	25.1574	0.305893
RIL152_9_1wkf_EM10x1_30s	RIL152	1	0.950241	1.21926	1.06387	0.199251	0.173663	24.0884	16.4434	0.317373
RIL151_6_1wkf_10x9300_30	RIL151	1	1.40477	0.714346	0.470779	0.243895	0.0576048	45.9917	31.7955	0.308667
RIL151_1_1wkf_10x9300_30	RIL151	1	1.63168	0.701336	0.456478	0.239004	0.38306	62.586	40.6034	0.351238
RIL151_8_1wkf_10x9300_30	RIL151	1	1.08529	0.930189	0.668622	0.270638	0.0918517	71.5081	51.4551	0.280429
RIL151_5_1wkf_10x9300_30	RIL151	1	1.06214	0.996655	0.762874	0.201765	0.261574	59.1563	31.7955	0.462516
RIL151_2_1wkf_10x9300_30	RIL151	1	1.38148	0.766301	0.508158	0.261788	0.271518	61.4965	40.5297	0.340943
RIL151_7_1wkf_10x9300_30	RIL151	1	1.51383	0.875676	0.636575	0.238376	0.872456	61.4089	49.2696	0.197679
RIL151_3_1wkf_10x9300_30	RIL151	1	0.673871	3.28548	3.3163	0.261836	4.00843	68.5264	38.8415	0.43319
RIL151_9_1wkf_10x9300_30	RIL151	1	2.08255	0.729323	0.556802	0.17252	1.60265	65.2807	45.3235	0.305714
RIL151_4_1wkf_10x9300_30	RIL151	1	1.6278	0.61822	0.427602	0.194961	0.0704519	54.69	32.8322	0.399667
RIL150_09_1wkf_EM10x1_30s	RIL150	1	2.0589	0.486019	0.280355	0.205867	0.0271419	67.2057	42.2164	0.371832
RIL150_05_1wkf_EM10x1_30s	RIL150	1	1.7845	0.5874	0.419193	0.175004	0.20408	62.6755	32.8497	0.475877
RIL150_06_1wkf_EM10x1_30s	RIL150	1	1.17698	0.92312	0.758287	0.187139	0.17782	39.1873	34.4105	0.121897
RIL150_07_1wkf_EM10x1_30s	RIL150	1	1.57658	0.748038	0.570427	0.189531	0.235977	39.0625	25	0.36
RIL150_02_1wkf_EM10x1_30s	RIL150	1	0.961214	1.08679	0.860795	0.252912	0.133777	60.9575	43.7779	0.28183
RIL150_04_1wkf_EM10x1_30s	RIL150	1	2.19098	0.458585	0.249985	0.211623	0.0596057	45.3125	17.4693	0.614471
RIL150_01_1wkf_EM10x1_30s	RIL150	1	0.530594	1.93238	1.73077	0.236561	0.194822	54.7098	34.4105	0.371036
RIL150_03_1wkf_EM10x1_30s	RIL150	1	0.883884	1.35166	1.19471	0.205982	0.343842	94.075	61.0176	0.351394
RIL150_08_1wkf_EM10x1_30s	RIL150	1	0.430239	2.37899	2.14735	0.231643	0.149424	78.1875	50.2192	0.357707
RIL15_03_1wkf_EM10x1_30s	RIL15	1	0.957887	1.18432	0.964198	0.21113	0.289909	59.4572	43.7779	0.263707
RIL15_04_1wkf_EM10x1_30s	RIL15	1	1.17942	0.863368	0.641274	0.224186	0.148046	89.1858	53.148	0.404076
RIL15_10_1wkf_EM10x1_30s	RIL15	1	1.64806	0.626505	0.426341	0.205548	0.168563	53.2168	31.289	0.412046
RIL15_11_1wkf_EM10x1_30s	RIL15	1	1.47836	0.686902	0.523165	0.170916	0.106217	60.9575	40.655	0.33306
RIL15_02_1wkf_EM10x1_30s	RIL15	1	2.06966	0.739907	0.564641	0.187117	1.53741	62.8117	23.4375	0.626861
RIL15_08_1wkf_EM10x1_30s	RIL15	1	2.32993	0.429962	0.246728	0.183235	0.0428439	65.7922	39.0625	0.406275
RIL15_09_1wkf_EM10x1_30s	RIL15	1	0.75525	1.51717	1.32205	0.260366	0.199269	64.1387	40.655	0.366138
RIL15_07_1wkf_EM10x1_30s	RIL15	1	1.55073	0.679798	0.525465	0.165655	0.220103	82.8272	43.75	0.471792
RIL15_06_1wkf_EM10x1_30s	RIL15	1	2.24667	0.447218	0.264765	0.183819	0.0645101	65.6994	35.9375	0.453001
RIL15_05_1wkf_EM10x1_30s	RIL15	1	0.62789	1.91357	1.76672	0.204386	0.36167	73.8519	44.1942	0.401584
RIL15_12_1wkf_EM10x1_30s	RIL15	1	1.25507	1.61671	1.39255	0.226884	1.54363	54.7767	37.5	0.315403
RIL15_01_1wkf_EM10x1_30s	RIL15	1	0.895661	1.45597	1.23734	0.218624	1.1333	64.0816	42.1875	0.341659
RIL148_04_1wkf_EM10x1_30s	RIL148	1	1.24246	0.906646	0.705281	0.203345	0.304661	109.42	46.9791	0.570652
RIL148_06_1wkf_EM10x1_30s	RIL148	1	3.10374	0.322253	0.141454	0.180799	0.0138873	96.9254	59.3956	0.387203
RIL148_11_1wkf_EM10x1_30s	RIL148	1	2.47694	0.406492	0.235096	0.173272	0.0716935	87.6255	48.4627	0.446934
RIL148_12_1wkf_EM10x1_30s	RIL148	1	1.26669	0.898398	0.721744	0.179571	0.303518	100.012	54.6875	0.453192
RIL148_10_1wkf_EM10x1_30s	RIL148	1	2.50696	0.410276	0.222828	0.189685	0.15376	85.9517	37.5325	0.56333
RIL148_03_1wkf_EM10x1_30s	RIL148	1	1.33135	0.751936	0.569971	0.181965	0.0331818	103.125	48.4627	0.530059
RIL148_08_1wkf_EM10x1_30s	RIL148	1	2.99853	0.333918	0.166606	0.167915	0.0362191	89.1858	50.0244	0.439099
RIL148_02_1wkf_EM10x1_30s	RIL148	1	1.15854	0.918094	0.691855	0.234343	0.202989	106.663	48.8391	0.542117
RIL148_01_1wkf_EM10x1_30s	RIL148	1	1.56335	0.652867	0.463581	0.189686	0.125201	93.8671	53.125	0.43404
RIL148_07_1wkf_EM10x1_30s	RIL148	1	1.40235	0.727242	0.515943	0.213205	0.152686	100.195	61.1175	0.390015
RIL148_09_1wkf_EM10x1_30s	RIL148	1	1.3578	0.760641	0.564269	0.195031	0.140302	95.3637	53.125	0.442922
RIL148_05_1wkf_EM10x1_30s	RIL148	1	2.72711	0.367007	0.185573	0.181851	0.0293228	80.0695	50.0976	0.374324
RIL147_02_1wkf_EM10x1_30s	RIL147	1	1.24437	0.819311	0.594247	0.237602	0.103283	68.7678	46.875	0.318358
RIL147_03_1wkf_EM10x1_30s	RIL147	1	1.45007	0.692172	0.526917	0.164831	0.0565275	57.8125	43.7779	0.242761
RIL147_01_1wkf_EM10x1_30s	RIL147	1	0.635218	1.63118	1.37435	0.22891	0.187258	76.5784	43.75	0.42869
RIL147_04_1wkf_EM10x1_30s	RIL147	1	2.43263	0.411271	0.25076	0.160512	0.0215897	60.9575	39.0937	0.358673
RIL147_06_1wkf_EM10x1_30s	RIL147	1	1.01632	1.14727	1.00749	0.179116	0.253966	79.7028	54.6875	0.313857
RIL147_05_1wkf_EM10x1_30s	RIL147	1	1.92919	0.684272	0.483276	0.205364	2.17918	120.323	68.7678	0.428472
RIL147_11_1wkf_EM10x1_30s	RIL147	1	1.75398	0.571685	0.407643	0.167414	0.0448504	92.2405	56.3367	0.38924
RIL147_09_1wkf_EM10x1_30s	RIL147	1	1.65979	0.620256	0.408104	0.219539	0.149679	78.2655	54.6875	0.301257
RIL147_07_1wkf_EM10x1_30s	RIL147	1	1.37001	0.735369	0.547967	0.194624	0.0718327	81.25	59.375	0.269231
RIL147_10_1wkf_EM10x1_30s	RIL147	1	1.85292	0.543394	0.369272	0.178262	0.0806892	81.25	50.2192	0.381917
RIL146_04_1wkf_EM10x1_30s	RIL146	1	0.813875	1.23657	1.02325	0.213318	0.0790714	54.7767	32.8497	0.400298
RIL146_08_1wkf_EM10x1_30s	RIL146	1	1.84223	0.555939	0.382553	0.180292	0.0952231	50.0244	29.6875	0.40654
RIL146_01_1wkf_EM10x1_30s	RIL146	1	1.01086	1.14329	0.911791	0.236434	0.784773	33.1456	21.9307	0.338352
RIL146_03_1wkf_EM10x1_30s	RIL146	1	0.827194	1.21081	0.999938	0.216547	0.0395043	43.75	25	0.428571
RIL146_02_1wkf_EM10x1_30s	RIL146	1	1.6538	0.646958	0.397731	0.249227	0.209102	42.2164	21.875	0.481837
RIL146_09_1wkf_EM10x1_30s	RIL146	1	0.865283	1.17124	0.948349	0.222894	0.125819	65.9219	29.7286	0.549033
RIL146_07_1wkf_EM10x1_30s	RIL146	1	1.00994	0.992297	0.74118	0.251117	0.0477375	43.75	20.3725	0.534343
RIL146_06_1wkf_EM10x1_30s	RIL146	1	1.27502	0.786484	0.63543	0.157065	0.0492188	68.75	50.0244	0.272372
RIL146_05_1wkf_EM10x1_30s	RIL146	1	1.5396	0.664986	0.468531	0.196417	0.14106	51.5625	34.4105	0.332645
RIL145_10_1wkf_10x9300_30	RIL145	1	1.67395	0.614443	0.366421	0.248023	0.140524	57.9714	30.6459	0.471361
RIL145_11_1wkf_10x9300_30	RIL145	1	1.15814	0.900198	0.570266	0.328107	0.190072	39.392	21.876	0.444659
RIL145_3_1wkf_10x9300_30	RIL145	1	1.61326	0.630769	0.395764	0.239356	0.163354	52.548	31.7202	0.396357
RIL145_4_1wkf_10x9300_30	RIL145	1	2.70576	0.376935	0.201329	0.177175	0.221079	48.8472	36.0624	0.26173
RIL145_5_1wkf_10x9300_30	RIL145	1	1.39722	0.733385	0.511076	0.228487	0.137289	47.0461	28.4388	0.395512
RIL145_6_1wkf_10x9300_30	RIL145	1	2.03617	0.495567	0.280747	0.214819	0.115623	73.3172	44.8458	0.388332
RIL145_7_1wkf_10x9300_30	RIL145	1	2.44469	0.41261	0.240547	0.173102	0.114047	40.4854	27.345	0.324571
RIL145_8_1wkf_10x9300_30	RIL145	1	1.80286	0.564023	0.290643	0.272439	0.163046	61.6034	32.9777	0.464678
RIL145_9_1wkf_10x9300_30	RIL145	1	1.97999	0.520609	0.276305	0.247709	0.27558	48.1396	24.0884	0.499613
RIL144_08_1wkf_EM10x1_30s	RIL144	1	1.61923	0.625745	0.442756	0.189248	0.092194	78.125	46.875	0.4
RIL144_01_1wkf_EM10x1_30s	RIL144	1	1.99342	0.521405	0.303025	0.21838	0.279533	79.7488	59.3956	0.255216
RIL144_02_1wkf_EM10x1_30s	RIL144	1	3.48464	0.289316	0.120773	0.168543	0.106951	69.1925	50.0244	0.277025
RIL144_10_1wkf_EM10x1_30s	RIL144	1	2.03422	0.492334	0.296294	0.19604	0.0368895	85.9943	54.7098	0.363797
RIL144_05_1wkf_EM10x1_30s	RIL144	1	1.75409	0.658501	0.443319	0.212671	0.316476	109.475	62.5195	0.428917
RIL144_09_1wkf_EM10x1_30s	RIL144	1	1.62306	0.766314	0.559564	0.20675	0.392376	117.188	67.2601	0.426047
RIL144_06_1wkf_EM10x1_30s	RIL144	1	1.48019	0.679067	0.478213	0.204499	0.0692661	81.6247	48.6638	0.403811
RIL144_07_1wkf_EM10x1_30s	RIL144	1	2.09495	0.511865	0.326175	0.187479	0.267566	101.611	62.5781	0.384138
RIL144_11_1wkf_EM10x1_30s	RIL144	1	1.35524	0.746204	0.562865	0.194343	0.0890742	103.88	59.703	0.425268
RIL144_04_1wkf_EM10x1_30s	RIL144	1	1.86106	0.575054	0.37094	0.207581	0.329952	87.5	53.3314	0.390498
RIL143_09_1wkf_EM10x1_30s	RIL143	1	1.301	0.820365	0.580747	0.249224	0.197465	53.148	32.8497	0.38192
RIL143_10_1wkf_EM10x1_30s	RIL143	1	0.960045	1.20527	0.958563	0.241021	0.374398	50.0244	28.1684	0.436907
RIL143_11_1wkf_EM10x1_30s	RIL143	1	0.870602	1.63053	1.45012	0.244197	0.822733	57.8969	32.8497	0.432618
RIL143_03_1wkf_EM10x1_30s	RIL143	1	1.21923	0.828651	0.598529	0.239936	0.0846684	46.901	31.289	0.332871
RIL143_06_1wkf_EM10x1_30s	RIL143	1	0.725346	1.47078	1.27118	0.243268	0.221474	51.5862	35.9715	0.302692
RIL143_01_1wkf_EM10x1_30s	RIL143	1	1.14866	1.29183	1.05738	0.288054	0.381843	57.8969	39.0625	0.325309
RIL143_07_1wkf_EM10x1_30s	RIL143	1	0.878796	1.66005	1.49909	0.235206	0.357527	64.0625	40.625	0.365854
RIL143_04_1wkf_EM10x1_30s	RIL143	1	1.9066	0.534275	0.304844	0.235337	0.10156	37.5	25.0488	0.332033
RIL143_02_1wkf_EM10x1_30s	RIL143	1	1.11345	0.915054	0.636643	0.278411	0.116574	56.445	35.9375	0.363318
RIL143_05_1wkf_EM10x1_30s	RIL143	1	1.2921	0.847931	0.64831	0.19962	0.233163	48.4627	34.5168	0.287767
RIL143_08_1wkf_EM10x1_30s	RIL143	1	0.989834	1.11455	0.876367	0.262734	0.271593	51.5862	37.5	0.273061
RIL142_12_1wkf_EM10x1_30s	RIL142	1	1.37784	0.744561	0.483639	0.261839	0.161655	50.0244	29.6875	0.40654
RIL142_09_1wkf_EM10x1_30s	RIL142	1	1.99165	0.502493	0.256609	0.245885	0.029553	64.1387	35.9375	0.439691
RIL142_02_1wkf_EM10x1_30s	RIL142	1	0.980658	1.02483	0.784048	0.254717	0.0639138	75	42.2164	0.437114
RIL142_06_1wkf_EM10x1_30s	RIL142	1	1.51168	0.674524	0.428971	0.250654	0.148951	70.3819	31.289	0.555439
RIL142_04_1wkf_EM10x1_30s	RIL142	1	1.99061	0.510136	0.283222	0.229335	0.153795	65.6994	34.4105	0.476243
RIL142_10_1wkf_EM10x1_30s	RIL142	1	1.67318	0.674597	0.437094	0.237503	0.483966	65.6994	35.9375	0.453001
RIL142_07_1wkf_EM10x1_30s	RIL142	1	1.28271	0.827803	0.623547	0.21815	0.18819	75.0651	40.745	0.457204
RIL142_11_1wkf_EM10x1_30s	RIL142	1	1.25313	0.875903	0.661475	0.224281	0.271625	64.2338	31.25	0.513496
RIL142_05_1wkf_EM10x1_30s	RIL142	1	2.20321	0.457536	0.239522	0.221522	0.0682329	57.8125	31.289	0.458784
RIL142_03_1wkf_EM10x1_30s	RIL142	1	3.07913	0.328376	0.121483	0.207429	0.144464	65.6994	39.1873	0.403536
RIL142_08_1wkf_EM10x1_30s	RIL142	1	0.891664	1.13565	0.908958	0.238949	0.121022	62.5	42.2164	0.324537
RIL141_02_1wkf_EM10x1_30s	RIL141	1	1.31278	0.863667	0.628894	0.253218	0.155901	54.7098	36.0731	0.340646
RIL141_05_1wkf_EM10x1_30s	RIL141	1	1.37807	0.729544	0.528032	0.20528	0.0694318	54.7098	42.2164	0.228357
RIL141_06_1wkf_EM10x1_30s	RIL141	1	1.70026	0.619994	0.441326	0.187842	0.164602	34.9386	18.815	0.461484
RIL141_09_1wkf_EM10x1_30s	RIL141	1	4.17609	0.24113	0.102579	0.139279	0.10215	62.5	34.4105	0.449432
RIL141_10_1wkf_EM10x1_30s	RIL141	1	2.04525	0.489551	0.267404	0.22175	0.0360449	68.75	39.0937	0.431364
RIL141_07_1wkf_EM10x1_30s	RIL141	1	2.22231	0.457059	0.265403	0.194164	0.11611	43.75	29.6875	0.321429
RIL141_12_1wkf_EM10x1_30s	RIL141	1	1.16187	0.869308	0.614443	0.263662	0.0934967	65.6436	37.5	0.428733
RIL141_04_1wkf_EM10x1_30s	RIL141	1	0.71822	1.45145	1.22812	0.25576	0.206592	73.4541	35.9375	0.510749
RIL141_01_1wkf_EM10x1_30s	RIL141	1	1.81687	0.557879	0.339963	0.22333	0.0890376	20.3725	9.375	0.539821
RIL141_11_1wkf_EM10x1_30s	RIL141	1	2.07939	0.48269	0.272586	0.210294	0.0610657	51.5862	35.9715	0.302692
RIL141_08_1wkf_EM10x1_30s	RIL141	1	1.92673	0.519235	0.329237	0.189998	0.0208791	56.445	32.8125	0.418682
RIL141_03_1wkf_EM10x1_30s	RIL141	1	1.02929	0.978448	0.739474	0.245331	0.083985	62.6755	43.8615	0.300182
RIL140_10_1wkf_EM10x1_30s	RIL140	1	1.87243	0.541266	0.355509	0.187535	0.11166	53.125	37.5325	0.293505
RIL140_12_1wkf_EM10x1_30s	RIL140	1	1.1779	1.03819	0.830602	0.221638	0.481491	54.7767	43.7779	0.200794
RIL140_02_1wkf_EM10x1_30s	RIL140	1	2.40758	0.415563	0.212591	0.202694	0.0224229	64.5371	37.7918	0.414417
RIL140_07_1wkf_EM10x1_30s	RIL140	1	1.66461	0.712459	0.503023	0.218839	0.419791	53.125	28.1684	0.469772
RIL140_09_1wkf_EM10x1_30s	RIL140	1	1.26687	0.827051	0.594145	0.23478	0.192372	62.5	29.6875	0.525
RIL140_08_1wkf_EM10x1_30s	RIL140	1	0.769327	1.55407	1.30468	0.266131	0.497277	65.6994	37.63	0.42724
RIL140_05_1wkf_EM10x1_30s	RIL140	1	1.03641	1.04364	0.816797	0.239301	0.266532	68.821	43.7779	0.363887
RIL140_03_1wkf_EM10x1_30s	RIL140	1	1.42806	0.702024	0.496343	0.207342	0.0510575	70.3299	40.655	0.421938
RIL140_11_1wkf_EM10x1_30s	RIL140	1	2.45593	0.413057	0.238942	0.176706	0.110696	78.2655	40.655	0.48055
RIL140_01_1wkf_EM10x1_30s	RIL140	1	2.21067	0.454714	0.252805	0.20268	0.0733095	54.7767	25.0488	0.542711
RIL140_04_1wkf_EM10x1_30s	RIL140	1	1.72157	0.702055	0.468431	0.237211	0.517255	62.5195	37.5	0.400187
RIL140_06_1wkf_EM10x1_30s	RIL140	1	1.88754	0.535729	0.329246	0.210715	0.0973193	51.5625	23.4375	0.545455
RIL14_11_1wkf_EM10x1_30s	RIL14	1	1.73758	0.594173	0.415909	0.1819	0.24003	62.5781	37.5325	0.400229
RIL14_07_1wkf_EM10x1_30s	RIL14	1	1.94113	0.566046	0.414811	0.159425	0.122683	65.625	37.5	0.428571
RIL14_10_1wkf_EM10x1_30s	RIL14	1	1.79322	0.575749	0.404469	0.179241	0.102067	37.5325	25	0.333911
RIL14_01_1wkf_EM10x1_30s	RIL14	1	1.83771	0.544899	0.313784	0.233356	0.0339272	62.5	32.8497	0.474405
RIL14_06_1wkf_EM10x1_30s	RIL14	1	0.673454	1.53748	1.16278	0.409462	0.142769	61.6544	35.9715	0.416563
RIL14_09_1wkf_EM10x1_30s	RIL14	1	0.953155	1.0507	0.840056	0.211595	0.0380696	57.8125	32.8497	0.431789
RIL14_12_1wkf_EM10x1_30s	RIL14	1	0.740744	1.35306	1.13994	0.213113	0.0481258	57.8969	39.0937	0.32477
RIL14_02_1wkf_EM10x1_30s	RIL14	1	2.02516	0.494153	0.292948	0.202501	0.0264056	56.2717	39.0625	0.305823
RIL14_08_1wkf_EM10x1_30s	RIL14	1	0.988395	1.02972	0.830932	0.216184	0.103475	79.7028	45.3394	0.431144
RIL14_03_1wkf_EM10x1_30s	RIL14	1	1.40951	0.711218	0.505547	0.20448	0.0476908	57.8125	32.8497	0.431789
RIL14_05_1wkf_EM10x1_30s	RIL14	1	2.20547	0.453787	0.25711	0.197826	0.0286543	75.0163	42.1875	0.437622
RIL14_04_1wkf_EM10x1_30s	RIL14	1	1.11309	0.954117	0.762808	0.214228	0.135212	64.1387	37.5325	0.414822
RIL139_10_1wkf_10x9300_30	RIL139	1	1.25464	0.87457	0.598456	0.268966	0.316578	67.8244	31.7391	0.532041
RIL139_11_1wkf_10x9300_30	RIL139	1	0.759297	1.65255	1.42826	0.25443	0.588552	79.8474	52.5024	0.342466
RIL139_1_1wkf_10x9300_30	RIL139	1	0.760412	2.50048	1.92365	0.701232	1.23684	61.2919	32.8322	0.46433
RIL139_2_1wkf_10x9300_30	RIL139	1	1.41617	0.768276	0.558332	0.222698	0.217562	54.7337	30.6459	0.440091
RIL139_3_1wkf_10x9300_30	RIL139	1	1.2143	0.849843	0.652429	0.20626	0.157334	59.1563	30.6264	0.48228
RIL139_4_1wkf_10x9300_30	RIL139	1	0.982498	1.02149	0.763546	0.26457	0.0584612	51.4202	29.6135	0.424088
RIL139_5_1wkf_10x9300_30	RIL139	1	0.898845	1.18597	0.92112	0.267474	0.198608	55.8802	31.7391	0.432016
RIL139_6_1wkf_10x9300_30	RIL139	1	0.89764	1.60688	1.39353	0.213356	0.795676	71.1054	35.0187	0.50751
RIL139_7_1wkf_10x9300_30	RIL139	1	1.51516	0.686587	0.464939	0.221648	0.207668	57.255	35.1551	0.385991
RIL139_8_1wkf_10x9300_30	RIL139	1	1.08205	1.16795	0.870222	0.297733	0.578325	69.1261	35.274	0.489715
RIL139_9_1wkf_10x9300_30	RIL139	1	1.04229	1.32964	1.12709	0.225962	1.18989	70.0117	35.0699	0.499086
RIL138_02_1wkf_10x9300_30	RIL138	1	1.37484	0.817204	0.582784	0.240091	0.283937	79.8549	38.3455	0.519811
RIL138_03_1wkf_10x9300_30	RIL138	1	2.25816	0.45938	0.255621	0.205329	0.319251	54.69	33.9254	0.379678
RIL138_05_1wkf_10x9300_30	RIL138	1	2.34576	0.435688	0.221776	0.216646	0.177495	51.5132	32.9777	0.359821
RIL138_06_1wkf_10x9300_30	RIL138	1	2.307	0.442348	0.251606	0.191331	0.195071	76.5972	36.112	0.528547
RIL138_08_1wkf_10x9300_30	RIL138	1	1.10867	1.06205	0.778505	0.286733	0.413065	43.8067	18.6267	0.574797
RIL138_09_1wkf_10x9300_30	RIL138	1	2.69236	0.383121	0.201864	0.183303	0.21913	55.8267	33.9254	0.392308
RIL138_11_1wkf_10x9300_30	RIL138	1	2.62676	0.385713	0.22543	0.160327	0.142554	54.7009	35.0187	0.359816
RIL138_1_1wkf_10x9300_30	RIL138	1	2.15299	0.470807	0.28254	0.19034	0.152836	63.5911	33.9254	0.466506
RIL137_1_1wkf_10x9300_30	RIL137	1	0.827972	1.32647	1.0899	0.273951	0.299592	49.221	26.274	0.466204
RIL137_2_1wkf_10x9300_30	RIL137	1	1.31061	0.803539	0.533128	0.267368	0.20308	45.9917	30.6459	0.333663
RIL137_3_1wkf_10x9300_30	RIL137	1	1.41026	0.72	0.5113	0.210659	0.166527	50.741	32.9777	0.350079
RIL137_4_1wkf_10x9300_30	RIL137	1	1.76043	0.627186	0.391937	0.232402	0.501411	81.6769	50.5047	0.381653
RIL137_5_1wkf_10x9300_30	RIL137	1	1.50239	0.666907	0.462018	0.199824	0.0459474	46.406	27.6928	0.40325
RIL137_6_1wkf_10x9300_30	RIL137	1	1.64319	0.644341	0.456909	0.191852	0.180954	49.2332	33.9254	0.310923
RIL137_7_1wkf_10x9300_30	RIL137	1	1.77748	0.817509	0.566725	0.251893	0.840888	72.4885	34.1889	0.528354
RIL137_8_1wkf_10x9300_30	RIL137	1	1.70488	0.615287	0.432187	0.1831	0.296187	37.2053	21.9033	0.411284
RIL137_9_1wkf_10x9300_30	RIL137	1	1.68843	0.612948	0.4416	0.179696	0.179502	40.8385	26.6133	0.348327
RIL136_10_1wkf_10x9300_30	RIL136	1	1.42363	0.725555	0.496713	0.234519	0.198672	50.3148	25.1812	0.499528
RIL136_11_1wkf_10x9300_30	RIL136	1	1.51694	0.681568	0.442947	0.238621	0.190242	55.8267	31.7391	0.431472
RIL136_3_1wkf_10x9300_30	RIL136	1	1.94279	0.519708	0.318679	0.201189	0.128328	60.3179	26.2512	0.564786
RIL136_4_1wkf_10x9300_30	RIL136	1	1.74828	0.578259	0.380883	0.201756	0.11168	62.4329	31.7955	0.490724
RIL136_5_1wkf_10x9300_30	RIL136	1	1.07633	0.98762	0.562534	0.425086	0.230773	53.6408	37.2535	0.305501
RIL136_6_1wkf_10x9300_30	RIL136	1	3.08865	0.334392	0.183146	0.151751	0.344295	63.9008	31.8895	0.500953
RIL136_7_1wkf_10x9300_30	RIL136	1	1.06115	0.964871	0.782414	0.198401	0.123767	67.8509	36.0954	0.468019
RIL136_8_1wkf_10x9300_30	RIL136	1	1.25695	0.848995	0.6536	0.21382	0.145566	64.6176	37.2053	0.424223
RIL136_9_1wkf_10x9300_30	RIL136	1	1.02232	1.00534	0.761026	0.250154	0.183289	47.1477	30.7044	0.348761
RIL135_11_1wkf_EM10x1_30s	RIL135	1	1.69598	0.604628	0.439937	0.164691	0.112571	40.745	21.875	0.463125
RIL135_01_1wkf_EM10x1_30s	RIL135	1	1.78052	0.562329	0.310302	0.25133	0.0361363	53.148	32.8125	0.38262
RIL135_04_1wkf_EM10x1_30s	RIL135	1	0.865046	1.16072	0.92733	0.240714	0.0594599	53.3314	34.5168	0.352787
RIL135_02_1wkf_EM10x1_30s	RIL135	1	2.17243	0.486376	0.272597	0.21789	0.107686	53.3314	28.1684	0.471824
RIL135_08_1wkf_EM10x1_30s	RIL135	1	1.55808	0.642296	0.411436	0.230859	0.027658	45.7415	21.875	0.521769
RIL135_06_1wkf_EM10x1_30s	RIL135	1	2.09493	0.478257	0.254617	0.223949	0.0438117	42.3031	34.375	0.187411
RIL135_07_1wkf_EM10x1_30s	RIL135	1	2.03134	0.493621	0.296857	0.199419	0.0446671	46.875	32.8497	0.299207
RIL135_10_1wkf_EM10x1_30s	RIL135	1	1.50592	0.684299	0.460329	0.234567	0.105475	40.655	31.289	0.230377
RIL135_03_1wkf_EM10x1_30s	RIL135	1	1.63449	0.629729	0.412794	0.225718	0.107621	43.75	23.6449	0.459545
RIL135_09_1wkf_EM10x1_30s	RIL135	1	2.39024	0.419863	0.189671	0.230851	0.0602292	46.9791	21.9307	0.533181
RIL135_05_1wkf_EM10x1_30s	RIL135	1	1.65145	0.620633	0.415029	0.214014	0.0995025	32.961	17.1875	0.47855
RIL134_11_1wkf_EM10x1_30s	RIL134	1	2.14058	0.513452	0.249689	0.268048	0.187222	62.5	31.289	0.499375
RIL134_08_1wkf_EM10x1_30s	RIL134	1	1.15405	0.869636	0.610281	0.261329	0.0599369	56.3367	29.7286	0.472305
RIL134_04_1wkf_EM10x1_30s	RIL134	1	0.558551	1.89265	1.64161	0.324537	0.1894	59.3956	28.1684	0.52575
RIL134_09_1wkf_EM10x1_30s	RIL134	1	1.57956	0.761744	0.532954	0.22879	0.546258	67.2057	35.9715	0.464756
RIL134_03_1wkf_EM10x1_30s	RIL134	1	1.18688	0.847395	0.586589	0.269402	0.0638599	43.7779	29.7286	0.320922
RIL134_01_1wkf_EM10x1_30s	RIL134	1	1.31812	0.952144	0.744289	0.230841	0.346821	59.375	31.289	0.473027
RIL134_05_1wkf_EM10x1_30s	RIL134	1	2.69201	0.372253	0.169219	0.204378	0.0414182	46.875	31.289	0.332501
RIL134_07_1wkf_EM10x1_30s	RIL134	1	1.57825	0.635933	0.395551	0.240675	0.0600704	57.8336	26.6084	0.539914
RIL134_06_1wkf_EM10x1_30s	RIL134	1	0.298365	3.68072	3.54658	0.34001	0.362033	50.0976	37.5325	0.250811
RIL134_10_1wkf_EM10x1_30s	RIL134	1	1.08892	0.92398	0.704517	0.219462	0.0788523	56.5962	34.6931	0.387006
RIL134_02_1wkf_EM10x1_30s	RIL134	1	0.813612	2.19478	1.93097	0.267793	0.977397	45.3394	29.7286	0.34431
RIL133_10_1wkf_EM10x1_30s	RIL133	1	0.944039	1.06036	0.796634	0.268192	0.0316702	75.1463	40.625	0.459388
RIL133_1_1wkf_EM10x1_30s	RIL133	1	0.890369	1.14457	0.912243	0.254132	0.105486	67.1875	35.9715	0.464611
RIL133_2_1wkf_EM10x1_30s	RIL133	1	2.223	0.451315	0.244509	0.206807	0.0527552	65.9219	32.8125	0.502252
RIL133_3_1wkf_EM10x1_30s	RIL133	1	0.747185	1.37649	1.12359	0.288414	0.123742	80.9188	39.3427	0.5138
RIL133_4_1wkf_EM10x1_30s	RIL133	1	0.912867	1.12859	0.93019	0.223604	0.123103	66.0884	32.8497	0.502943
RIL133_5_1wkf_EM10x1_30s	RIL133	1	1.88678	0.53042	0.311615	0.218805	0.0271483	70.3299	31.289	0.55511
RIL133_6_1wkf_EM10x1_30s	RIL133	1	1.07948	0.935459	0.722802	0.22397	0.0875514	54.7098	29.6875	0.457364
RIL133_7_1wkf_EM10x1_30s	RIL133	1	0.830599	1.21421	0.953646	0.251027	0.0926085	80.4346	37.63	0.532167
RIL133_8_1wkf_EM10x1_30s	RIL133	1	1.45484	0.696515	0.458181	0.237515	0.158119	71.9429	35.9375	0.500472
RIL133_9_1wkf_EM10x1_30s	RIL133	1	1.6056	0.623222	0.425938	0.197075	0.0257644	54.7098	29.8515	0.454366
RIL131_9_1wkf_EM10x1_30s	RIL131	1	1.12541	1.30966	1.06067	0.264805	0.590031	39.1873	20.3125	0.481656
RIL131_8_1wkf_EM10x1_30s	RIL131	1	0.773066	1.62342	1.45463	0.236024	0.53762	39.0937	28.125	0.280575
RIL131_5_1wkf_EM10x1_30s	RIL131	1	1.68379	0.708566	0.39544	0.322272	0.417614	25	15.625	0.375
RIL131_6_1wkf_EM10x1_30s	RIL131	1	0.444271	3.16779	2.9227	0.24509	1.46141	47.1088	34.4105	0.269553
RIL131_3_1wkf_EM10x1_30s	RIL131	1	1.11564	1.05836	0.686784	0.36552	0.573288	43.75	28.125	0.357143
RIL131_4_1wkf_EM10x1_30s	RIL131	1	1.0328	1.03348	0.81991	0.234074	0.18494	50.0244	37.5325	0.249716
RIL131_2_1wkf_EM10x1_30s	RIL131	1	0.991188	1.61727	1.31583	0.284266	1.50035	56.2717	31.289	0.443965
RIL131_1_1wkf_EM10x1_30s	RIL131	1	0.417662	2.86533	2.63412	0.264127	0.368749	40.655	23.4375	0.423503
RIL130_09_1wkf_EM10x1_30s	RIL130	1	1.15069	0.907525	0.713627	0.212841	0.130758	43.75	28.1684	0.356152
RIL130_11_1wkf_EM10x1_30s	RIL130	1	0.882792	1.32185	1.135	0.237949	0.181382	65.625	40.655	0.380495
RIL130_03_1wkf_EM10x1_30s	RIL130	1	1.76089	0.568992	0.357448	0.213899	0.0412435	40.745	25.0488	0.385231
RIL130_02_1wkf_EM10x1_30s	RIL130	1	1.50994	0.664016	0.447992	0.218078	0.0508285	59.375	31.289	0.473027
RIL130_06_1wkf_EM10x1_30s	RIL130	1	1.59767	0.63297	0.434033	0.205773	0.0810328	50.8713	26.6084	0.476947
RIL130_07_1wkf_EM10x1_30s	RIL130	1	2.78967	0.360026	0.199186	0.16273	0.052838	42.2164	23.4895	0.443593
RIL130_05_1wkf_EM10x1_30s	RIL130	1	1.64005	0.610033	0.429273	0.180909	0.0220139	50	29.7286	0.405428
RIL130_08_1wkf_EM10x1_30s	RIL130	1	0.91408	1.29836	1.11128	0.225597	0.288168	54.7098	29.7286	0.456613
RIL130_10_1wkf_EM10x1_30s	RIL130	1	1.04511	1.1454	0.951582	0.225224	0.346787	34.4105	23.4895	0.317373
RIL130_01_1wkf_EM10x1_30s	RIL130	1	0.962563	1.10446	0.808759	0.324494	0.171608	62.5781	39.0937	0.375281
RIL130_04_1wkf_EM10x1_30s	RIL130	1	1.44469	0.693518	0.442607	0.253846	0.0418927	50.0244	31.5996	0.368316
RIL13_10_1wkf_EM10x1_30s	RIL13	1	1.41444	0.718913	0.508887	0.211238	0.120289	43.8067	19.7188	0.549868
RIL13_5_1wkf_EM10x1_30s	RIL13	1	2.09991	0.487529	0.287869	0.203033	0.162963	47.1477	24.0636	0.489613
RIL13_6_1wkf_EM10x1_30s	RIL13	1	1.85292	0.689985	0.468129	0.214018	0.397966	47.2365	22.9698	0.513727
RIL13_3_1wkf_EM10x1_30s	RIL13	1	0.993997	1.11997	0.905849	0.21412	0.320006	48.1396	32.8322	0.317979
RIL13_2_1wkf_EM10x1_30s	RIL13	1	0.76303	1.37704	1.1424	0.236974	0.250332	51.5132	28.5228	0.446301
RIL13_8_1wkf_EM10x1_30s	RIL13	1	1.50149	0.669435	0.473722	0.200459	0.0651493	52.5024	28.4388	0.458333
RIL13_12_1wkf_EM10x1_30s	RIL13	1	1.047	1.05851	0.871786	0.211283	0.219375	37.2053	20.811	0.440645
RIL13_9_1wkf_EM10x1_30s	RIL13	1	1.28234	0.846796	0.661763	0.193038	0.224192	47.4891	25.535	0.462297
RIL13_1_1wkf_EM10x1_30s	RIL13	1	1.23153	0.842477	0.633049	0.225134	0.124986	49.2332	26.274	0.466336
RIL13_7_1wkf_EM10x1_30s	RIL13	1	2.13052	0.469803	0.313784	0.156867	0.0302214	49.3303	28.4598	0.423076
RIL13_4_1wkf_EM10x1_30s	RIL13	1	1.76516	0.723614	0.526091	0.206619	0.820959	49.2696	28.4598	0.422365
RIL13_11_1wkf_EM10x1_30s	RIL13	1	2.30053	0.435331	0.262905	0.173527	0.0370886	43.8749	22.9698	0.47647
RIL129_9_1wkf_10x9300_30	RIL129	1	0.982293	1.82113	1.57931	0.290506	1.48304	48.2389	32.8322	0.319383
RIL129_11_1wkf_10x9300_30	RIL129	1	1.72932	0.765392	0.601547	0.249629	0.590182	83.1576	41.5788	0.5
RIL129_3_1wkf_10x9300_30	RIL129	1	1.55935	0.71904	0.421025	0.29832	0.27957	94.4729	52.7865	0.441253
RIL129_10_1wkf_10x9300_30	RIL129	1	1.38331	0.757005	0.419265	0.343629	0.303353	65.6644	38.2986	0.416753
RIL129_4_1wkf_10x9300_30	RIL129	1	1.96584	0.514088	0.267335	0.246753	0.139761	82.0423	52.6048	0.358808
RIL129_2_1wkf_10x9300_30	RIL129	1	2.35995	0.431982	0.222537	0.209631	0.208297	53.6074	28.4388	0.469498
RIL129_8_1wkf_10x9300_30	RIL129	1	1.94836	0.590948	0.30246	0.294538	0.535704	73.2928	44.8591	0.387946
RIL129_5_1wkf_10x9300_30	RIL129	1	1.64967	0.625436	0.412471	0.212965	0.189353	59.8799	39.2703	0.344182
RIL128_09_1wkf_EM10x1_30s	RIL128	1	1.50502	0.664814	0.481644	0.184078	0.0245362	56.2717	32.961	0.414253
RIL128_02_1wkf_EM10x1_30s	RIL128	1	1.03082	0.981847	0.744071	0.250695	0.0952618	64.0625	42.1875	0.341463
RIL128_04_1wkf_EM10x1_30s	RIL128	1	1.39966	0.754985	0.569715	0.199868	0.123832	60.9375	40.655	0.33284
RIL128_11_1wkf_EM10x1_30s	RIL128	1	0.94672	1.10871	0.911505	0.22447	0.154341	50.0976	29.6875	0.407406
RIL128_01_1wkf_EM10x1_30s	RIL128	1	1.58743	0.642759	0.402045	0.240714	0.136219	70.3819	42.2164	0.400181
RIL128_07_1wkf_EM10x1_30s	RIL128	1	1.88121	0.531839	0.330042	0.201701	0.0237594	84.8942	60.9575	0.281959
RIL128_12_1wkf_EM10x1_30s	RIL128	1	2.16349	0.466742	0.296469	0.173618	0.0978306	53.125	35.9375	0.323529
RIL128_03_1wkf_EM10x1_30s	RIL128	1	0.929113	1.12276	0.911436	0.238123	0.148562	54.6875	31.4059	0.425721
RIL128_05_1wkf_EM10x1_30s	RIL128	1	1.08367	0.925248	0.693144	0.233734	0.052179	72.2983	42.1875	0.41648
RIL128_08_1wkf_EM10x1_30s	RIL128	1	1.49637	0.670141	0.46712	0.206219	0.0509143	48.4627	26.6084	0.450951
RIL128_10_1wkf_EM10x1_30s	RIL128	1	1.12285	0.987217	0.775063	0.212154	0.263902	71.892	42.2164	0.41278
RIL128_06_1wkf_EM10x1_30s	RIL128	1	0.995518	1.02866	0.818562	0.229874	0.108743	56.25	37.5325	0.332755
RIL127_12_1wkf_EM10x1_30s	RIL127	1	1.50943	0.689727	0.481004	0.211384	0.153948	50.6112	27.3669	0.459272
RIL127_11_1wkf_EM10x1_30s	RIL127	1	2.39572	0.417523	0.218713	0.198811	0.0168142	43.7657	24.0884	0.449604
RIL127_8_1wkf_EM10x1_30s	RIL127	1	1.13175	1.2626	1.09036	0.1944	0.57164	35.0016	22.9698	0.34375
RIL127_1_1wkf_EM10x1_30s	RIL127	1	1.66079	0.604747	0.374242	0.23328	0.0680453	38.3455	21.876	0.429502
RIL127_2_1wkf_EM10x1_30s	RIL127	1	2.15026	0.465485	0.274454	0.191483	0.0301763	25.1812	15.3522	0.39033
RIL127_10_1wkf_EM10x1_30s	RIL127	1	1.04619	0.965645	0.753888	0.222165	0.0906986	45.0587	25.1812	0.441148
RIL127_5_1wkf_EM10x1_30s	RIL127	1	2.05664	0.493946	0.310138	0.183808	0.180234	35.0699	18.6267	0.468868
RIL127_3_1wkf_EM10x1_30s	RIL127	1	2.17569	0.459979	0.27196	0.188169	0.0275773	50.3267	25.1574	0.500118
RIL127_9_1wkf_EM10x1_30s	RIL127	1	2.17926	0.459391	0.255111	0.205078	0.0334397	46.0566	24.0636	0.477522
RIL127_7_1wkf_EM10x1_30s	RIL127	1	1.54752	0.666228	0.462729	0.213142	0.107307	45.9917	24.1628	0.474626
RIL127_4_1wkf_EM10x1_30s	RIL127	1	1.24309	0.808633	0.556638	0.251475	0.0697134	52.6844	22.9958	0.563517
RIL127_6_1wkf_EM10x1_30s	RIL127	1	1.01548	1.14776	0.977343	0.209801	0.220086	52.5138	28.5228	0.456851
RIL126_08_1wkf_EM10x1_30s	RIL126	1	1.2747	1.20828	0.945174	0.214892	0.792037	39.1873	26.6084	0.320994
RIL126_05_1wkf_EM10x1_30s	RIL126	1	0.87065	1.77894	1.5996	0.231792	0.4637	62.5195	48.4375	0.225242
RIL126_09_1wkf_EM10x1_30s	RIL126	1	0.753534	1.35497	1.16125	0.19372	0.151171	51.6571	34.4105	0.333867
RIL126_01_1wkf_EM10x1_30s	RIL126	1	0.58368	1.73685	1.50656	0.244207	0.129365	51.6571	34.4105	0.333867
RIL126_03_1wkf_EM10x1_30s	RIL126	1	1.83279	0.581735	0.414228	0.172023	0.225212	57.8969	34.4105	0.405659
RIL126_04_1wkf_EM10x1_30s	RIL126	1	0.996617	1.04396	0.821117	0.222841	0.167699	48.6638	29.7286	0.389102
RIL126_12_1wkf_EM10x1_30s	RIL126	1	0.42733	2.71097	2.32757	0.261217	0.54989	50.2192	34.375	0.315501
RIL126_06_1wkf_EM10x1_30s	RIL126	1	0.941963	1.49796	1.31455	0.236204	0.428489	31.5996	11.0485	0.650358
RIL126_07_1wkf_EM10x1_30s	RIL126	1	0.680019	1.53541	1.27058	0.264833	0.218423	45.3125	34.375	0.241379
RIL126_11_1wkf_EM10x1_30s	RIL126	1	0.426981	2.49959	2.30142	0.243131	0.347711	50.0976	28.2981	0.435141
RIL126_10_1wkf_EM10x1_30s	RIL126	1	1.61008	0.622332	0.427609	0.195646	0.0432607	43.7779	23.4375	0.464627
RIL126_02_1wkf_EM10x1_30s	RIL126	1	0.548607	1.95218	1.76313	0.198934	0.272463	71.892	45.3394	0.36934
RIL125_12_1wkf_EM10x1_30s	RIL125	1	1.74103	0.579935	0.369298	0.211097	0.0939667	64.1387	31.5996	0.507324
RIL125_08_1wkf_EM10x1_30s	RIL125	1	1.8586	0.539252	0.296781	0.245252	0.0435589	68.7678	35.9375	0.477408
RIL125_11_1wkf_EM10x1_30s	RIL125	1	1.07206	1.05701	0.838883	0.218124	0.277387	75	29.6875	0.604167
RIL125_05_1wkf_EM10x1_30s	RIL125	1	1.18402	0.918856	0.674114	0.244741	0.257206	46.9791	32.8497	0.300759
RIL125_01_1wkf_EM10x1_30s	RIL125	1	1.13232	0.928378	0.723561	0.209343	0.163692	45.3125	31.5996	0.302629
RIL125_02_1wkf_EM10x1_30s	RIL125	1	2.67109	0.374636	0.172233	0.202406	0.0263453	53.125	34.375	0.352941
RIL125_04_1wkf_EM10x1_30s	RIL125	1	1.47784	0.678876	0.480338	0.199991	0.0567741	62.6755	34.375	0.45154
RIL125_09_1wkf_EM10x1_30s	RIL125	1	1.96014	0.537744	0.313892	0.223852	0.283872	48.4627	29.8515	0.384031
RIL125_06_1wkf_EM10x1_30s	RIL125	1	1.01339	1.00587	0.829389	0.194222	0.105544	73.5869	43.7779	0.405086
RIL125_10_1wkf_EM10x1_30s	RIL125	1	1.65459	0.708273	0.524954	0.198638	0.334547	56.3367	23.4895	0.583051
RIL125_03_1wkf_EM10x1_30s	RIL125	1	2.38424	0.454869	0.259319	0.199453	0.173429	59.4572	36.2419	0.390453
RIL123_8_1wkf_10x9300_30	RIL123	1	1.60109	0.650177	0.394158	0.257306	0.244893	43.7657	26.274	0.399667
RIL123_9_1wkf_10x9300_30	RIL123	1	2.01212	0.58322	0.42687	0.152812	0.363397	44.8591	26.2512	0.414808
RIL123_3_1wkf_10x9300_30	RIL123	1	1.11664	0.935637	0.709201	0.244172	0.176121	55.8267	30.6459	0.451052
RIL123_6_1wkf_10x9300_30	RIL123	1	0.787633	1.33698	1.10767	0.248426	0.239566	48.1396	22.9698	0.52285
RIL123_10_1wkf_10x9300_30	RIL123	1	1.14673	1.42605	1.1128	0.256106	0.983868	53.6966	32.814	0.388899
RIL123_2_1wkf_10x9300_30	RIL123	1	0.774534	1.40788	1.21058	0.249234	0.173034	60.1689	36.0954	0.400099
RIL123_4_1wkf_10x9300_30	RIL123	1	0.435905	2.89811	2.91494	0.29845	0.548422	62.3562	31.7391	0.491004
RIL123_7_1wkf_10x9300_30	RIL123	1	1.59693	0.649951	0.469319	0.190069	0.137263	43.8067	27.3669	0.375281
RIL123_1_1wkf_10x9300_30	RIL123	1	1.18494	0.89958	0.665556	0.241677	0.24332	58.0642	28.5228	0.508771
RIL123_5_1wkf_10x9300_30	RIL123	1	1.28894	0.801782	0.59614	0.215166	0.210009	63.779	36.1616	0.433016
RIL121_10_1wkf_EM10x1_30s	RIL121	1	0.82488	1.36952	1.16203	0.255486	0.237137	48.6638	28.1684	0.421164
RIL121_11_1wkf_EM10x1_30s	RIL121	1	0.869655	1.94075	1.78782	0.254267	2.08807	51.9399	21.875	0.57884
RIL121_12_1wkf_EM10x1_30s	RIL121	1	1.30466	0.778469	0.559675	0.22871	0.100106	48.6638	25	0.486271
RIL121_1_1wkf_EM10x1_30s	RIL121	1	1.01084	1.0017	0.717784	0.292115	0.104481	45.3125	23.4375	0.482759
RIL121_2_1wkf_EM10x1_30s	RIL121	1	1.65055	0.898085	0.627145	0.27094	1.11256	59.375	31.289	0.473027
RIL121_3_1wkf_EM10x1_30s	RIL121	1	0.609555	1.74764	1.54817	0.267736	0.178572	62.5195	32.8125	0.475164
RIL121_4_1wkf_EM10x1_30s	RIL121	1	0.565724	1.78745	1.50145	0.305139	0.117926	53.6964	31.5996	0.411513
RIL121_5_1wkf_EM10x1_30s	RIL121	1	1.43984	0.739699	0.494218	0.251953	0.14131	43.8615	26.5625	0.3944
RIL121_6_1wkf_EM10x1_30s	RIL121	1	1.24186	0.808072	0.583766	0.233558	0.0519252	35.9375	23.4895	0.346378
RIL121_7_1wkf_EM10x1_30s	RIL121	1	1.85711	0.538862	0.340057	0.200261	0.0262815	40.745	28.1684	0.308667
RIL121_8_1wkf_EM10x1_30s	RIL121	1	1.735	0.601556	0.391854	0.213726	0.155928	34.4105	20.3125	0.4097
RIL121_9_1wkf_EM10x1_30s	RIL121	1	0.812825	1.37654	1.1315	0.284356	0.230064	45.3394	23.4895	0.481918
RIL120_1_1wkf_10x9300_30	RIL120	1	1.71051	0.589424	0.359198	0.235698	0.0779851	49.221	33.9254	0.310753
RIL120_2_1wkf_10x9300_30	RIL120	1	2.29487	0.518877	0.291887	0.22699	0.301431	36.2442	21.0397	0.419503
RIL120_3_1wkf_10x9300_30	RIL120	1	0.993128	1.0484	0.824219	0.247424	0.151036	49.6566	32.1882	0.351784
RIL120_4_1wkf_10x9300_30	RIL120	1	0.848224	1.35747	1.09744	0.294889	0.316961	48.1396	30.6459	0.363395
RIL120_5_1wkf_10x9300_30	RIL120	1	1.08291	1.14972	0.867215	0.250115	0.574796	73.4151	47.0842	0.358657
RIL120_6_1wkf_10x9300_30	RIL120	1	0.924687	1.09098	0.85395	0.237028	0.0914126	53.6074	35.0187	0.346756
RIL120_01_1wkf_EM10x1_30s	RIL120	1	1.20329	0.869627	0.647612	0.232663	0.17628	42.2164	23.4375	0.444825
RIL120_03_1wkf_EM10x1_30s	RIL120	1	1.44669	0.693986	0.456997	0.242154	0.0529789	51.5625	32.8497	0.362915
RIL120_04_1wkf_EM10x1_30s	RIL120	1	1.04959	0.956031	0.687846	0.268184	0.0611902	39.1873	21.875	0.441783
RIL120_02_1wkf_EM10x1_30s	RIL120	1	1.05345	0.95112	0.733504	0.217616	0.0413316	84.5051	45.3394	0.463471
RIL12_02_1wkf_EM10x1_30s	RIL12	1	1.22885	0.82442	0.636127	0.195766	0.110338	59.5597	28.1684	0.527057
RIL12_10_1wkf_EM10x1_30s	RIL12	1	1.20675	0.834341	0.65329	0.189996	0.0732785	60.9575	39.0625	0.359185
RIL12_01_1wkf_EM10x1_30s	RIL12	1	1.1114	0.949532	0.689838	0.265844	0.285438	57.8336	32.8497	0.431997
RIL12_06_1wkf_EM10x1_30s	RIL12	1	1.86146	0.537559	0.312794	0.224765	0.0255044	51.5625	26.5625	0.484848
RIL12_11_1wkf_EM10x1_30s	RIL12	1	0.617913	1.70938	1.57088	0.202178	0.160412	64.0816	35.9375	0.439191
RIL12_09_1wkf_EM10x1_30s	RIL12	1	2.40039	0.41687	0.260469	0.157237	0.0250741	51.5625	28.125	0.454545
RIL12_12_1wkf_EM10x1_30s	RIL12	1	1.40895	0.711005	0.519898	0.192319	0.0418406	59.4572	31.25	0.474412
RIL12_07_1wkf_EM10x1_30s	RIL12	1	1.11592	0.971406	0.76818	0.215654	0.304918	64.0816	32.8497	0.487377
RIL12_08_1wkf_EM10x1_30s	RIL12	1	0.629216	1.79215	1.65545	0.221022	0.242778	53.2168	32.8497	0.38272
RIL12_03_1wkf_EM10x1_30s	RIL12	1	1.26536	0.820192	0.586561	0.249312	0.116533	57.8125	32.8125	0.432432
RIL12_05_1wkf_EM10x1_30s	RIL12	1	0.64685	1.6133	1.43801	0.224715	0.164709	62.5781	39.0937	0.375281
RIL12_04_1wkf_EM10x1_30s	RIL12	1	0.73036	1.38091	1.17214	0.211339	0.0888888	75	46.901	0.374653
RIL119_01_1wkf_EM10x1_30s	RIL119	1	0.56512	1.78136	1.59011	0.208701	0.0803518	76.7059	46.901	0.38856
RIL119_02_1wkf_EM10x1_30s	RIL119	1	1.65278	0.609824	0.412542	0.199263	0.0784938	54.7098	34.4105	0.371036
RIL119_07_1wkf_EM10x1_30s	RIL119	1	0.907628	1.1728	0.950332	0.240136	0.178841	60.9575	34.375	0.436083
RIL119_05_1wkf_EM10x1_30s	RIL119	1	2.86718	0.348909	0.159103	0.189806	0.0226986	56.5962	32.8497	0.419578
RIL119_09_1wkf_EM10x1_30s	RIL119	1	2.17568	0.46054	0.274575	0.185798	0.0468479	48.4375	34.375	0.290323
RIL119_03_1wkf_EM10x1_30s	RIL119	1	1.58486	0.714683	0.474241	0.240442	0.542615	54.7098	37.5325	0.313971
RIL119_04_1wkf_EM10x1_30s	RIL119	1	1.32567	0.785096	0.48386	0.307908	0.189269	56.2717	32.8125	0.416892
RIL119_10_1wkf_EM10x1_30s	RIL119	1	1.26255	0.850288	0.662819	0.199036	0.21532	64.1387	32.8497	0.487833
RIL119_06_1wkf_EM10x1_30s	RIL119	1	1.23828	0.952157	0.731466	0.198067	0.880127	51.5625	32.8125	0.363636
RIL119_08_1wkf_EM10x1_30s	RIL119	1	1.87716	0.536455	0.351804	0.183606	0.0816209	65.625	34.4105	0.47565
RIL118_06_1wkf_EM10x1_30s	RIL118	1	1.83586	0.555365	0.379489	0.181422	0.0908533	42.2164	29.7286	0.295805
RIL118_02_1wkf_EM10x1_30s	RIL118	1	1.2075	0.834359	0.641128	0.194333	0.070627	47.8033	34.6931	0.274253
RIL118_10_1wkf_EM10x1_30s	RIL118	1	1.74591	0.576779	0.390836	0.190479	0.0678593	50.2192	31.289	0.376951
RIL118_01_1wkf_EM10x1_30s	RIL118	1	2.08342	0.481692	0.352459	0.128946	0.0644657	71.875	46.901	0.347464
RIL118_04_1wkf_EM10x1_30s	RIL118	1	1.07418	0.990312	0.80382	0.21121	0.13582	43.8615	25	0.430024
RIL118_09_1wkf_EM10x1_30s	RIL118	1	0.790463	1.27539	1.12797	0.164178	0.0828081	51.6571	32.8125	0.364802
RIL118_07_1wkf_EM10x1_30s	RIL118	1	1.75738	0.57465	0.403399	0.176642	0.0747959	54.888	35.9715	0.344639
RIL118_08_1wkf_EM10x1_30s	RIL118	1	0.908823	1.12487	0.946923	0.200643	0.111821	51.9399	33.1456	0.361847
RIL118_03_1wkf_EM10x1_30s	RIL118	1	1.23574	0.81311	0.602202	0.212589	0.0719509	54.7767	40.745	0.256162
RIL118_05_1wkf_EM10x1_30s	RIL118	1	1.65556	0.604421	0.418827	0.185594	0.0270311	72.4838	42.3031	0.416379
F8117_08_1wkf_C9300_30s_LE	RIL117	1	1.11487	1.13848	0.851915	0.260176	0.88266	106.983	78.2655	0.268429
F8117_05_1wkf_C9300_30s_LE	RIL117	1	1.84584	0.589461	0.386862	0.198849	0.352508	59.3956	44.0004	0.259197
F8117_11_1wkf_C9300_30s_LE	RIL117	1	1.58463	0.764908	0.490866	0.275664	0.43531	75.26	29.7286	0.604988
F8117_07_1wkf_C9300_30s_LE	RIL117	1	0.696405	1.49583	1.21997	0.302489	0.201404	93.8021	65.6436	0.30019
F8117_04_1wkf_C9300_30s_LE	RIL117	1	1.10756	1.00015	0.730881	0.269267	0.28154	50.0244	35.2516	0.295312
F8117_03_1wkf_C9300_30s_LE	RIL117	1	1.42826	0.852738	0.611465	0.258593	0.549298	76.6262	42.3031	0.44793
F8117_02_1wkf_C9300_30s_LE	RIL117	1	1.34072	0.886127	0.667547	0.227793	0.463524	90.7461	56.3367	0.379183
RIL117_11_1wkf_EM10x1_30s	RIL117	1	0.699841	2.10044	1.98397	0.224091	1.7837	61.0176	37.5	0.385423
RIL117_02_1wkf_EM10x1_30s	RIL117	1	0.966197	1.04511	0.820994	0.219304	0.0977374	68.7678	51.5862	0.249849
RIL117_04_1wkf_EM10x1_30s	RIL117	1	0.728008	1.4136	1.19664	0.250971	0.172171	59.3956	34.4105	0.420655
RIL117_05_1wkf_EM10x1_30s	RIL117	1	0.498958	4.83123	4.59779	0.233439	4.20736	73.703	46.9791	0.36259
RIL117_10_1wkf_EM10x1_30s	RIL117	1	2.71296	0.395565	0.218669	0.176896	0.347766	70.3819	46.875	0.333991
RIL117_08_1wkf_EM10x1_30s	RIL117	1	0.638465	1.61832	1.44066	0.221032	0.162962	65.9219	35.9375	0.454848
RIL117_07_1wkf_EM10x1_30s	RIL117	1	0.893893	1.21028	1.04964	0.219393	0.213848	68.7678	39.0625	0.431965
RIL117_12_1wkf_EM10x1_30s	RIL117	1	0.852247	1.23834	1.07295	0.194168	0.263386	71.9429	51.5625	0.283286
RIL117_09_1wkf_EM10x1_30s	RIL117	1	0.859688	1.29172	1.08232	0.240507	0.41983	62.5195	51.5862	0.174879
RIL117_06_1wkf_EM10x1_30s	RIL117	1	1.355	0.947868	0.770698	0.195461	1.16514	82.8714	59.3956	0.283281
RIL117_03_1wkf_EM10x1_30s	RIL117	1	0.740709	1.45753	1.23078	0.247143	0.191525	46.9791	32.8125	0.30155
RIL117_01_1wkf_EM10x1_30s	RIL117	1	0.722053	1.46737	1.1731	0.317999	0.357258	68.75	48.4375	0.295455
RIL116_06_1wkf_EM10x1_30s	RIL116	1	1.95447	0.514132	0.333643	0.183891	0.0568294	60.9375	32.8497	0.460928
RIL116_02_1wkf_EM10x1_30s	RIL116	1	0.844898	1.18954	0.962887	0.238366	0.0663356	43.75	18.815	0.569943
RIL116_04_1wkf_EM10x1_30s	RIL116	1	0.824655	1.21886	1.02748	0.197757	0.0717119	62.6755	31.289	0.500777
RIL116_12_1wkf_EM10x1_30s	RIL116	1	0.664291	1.51237	1.31202	0.215908	0.0656283	57.8336	34.375	0.405622
RIL116_05_1wkf_EM10x1_30s	RIL116	1	0.96629	1.04405	0.8605	0.19787	0.0779701	40.745	31.289	0.232077
RIL116_01_1wkf_EM10x1_30s	RIL116	1	1.41696	1.07554	0.913369	0.195565	0.233244	45.4201	29.7286	0.345475
RIL116_10_1wkf_EM10x1_30s	RIL116	1	0.971084	1.16336	1.02435	0.179921	0.18817	45.3125	26.5625	0.413793
RIL116_03_1wkf_EM10x1_30s	RIL116	1	0.710827	1.49254	1.29613	0.234164	0.222018	50.0976	28.125	0.438595
RIL116_11_1wkf_EM10x1_30s	RIL116	1	0.723289	1.4065	1.2056	0.230219	0.10718	51.5862	25.0488	0.514428
RIL116_08_1wkf_EM10x1_30s	RIL116	1	2.08739	0.479608	0.296541	0.184721	0.0315366	46.9791	28.5129	0.393071
RIL116_09_1wkf_EM10x1_30s	RIL116	1	2.34944	0.427194	0.248984	0.180535	0.0493493	64.0625	40.655	0.365385
RIL116_07_1wkf_EM10x1_30s	RIL116	1	0.696536	1.47714	1.27116	0.205975	0.172824	47.1088	28.2981	0.399304
RIL115_04_1wkf_EM10x1_30s	RIL115	1	1.19721	1.56951	1.24723	0.206241	0.546207	51.5862	37.5325	0.27243
RIL115_10_1wkf_EM10x1_30s	RIL115	1	1.09587	0.948518	0.759176	0.209881	0.12868	34.4105	21.9307	0.362673
RIL115_03_1wkf_EM10x1_30s	RIL115	1	1.35709	0.773286	0.583097	0.187931	0.174627	50.0976	32.8497	0.344286
RIL115_06_1wkf_EM10x1_30s	RIL115	1	0.710524	1.47177	1.29913	0.198947	0.201177	76.5784	46.875	0.387883
RIL115_11_1wkf_EM10x1_30s	RIL115	1	1.70663	0.587256	0.400998	0.185546	0.0466553	56.445	39.1873	0.305743
RIL115_01_1wkf_EM10x1_30s	RIL115	1	1.82143	0.579124	0.412352	0.166772	0.12129	50.2192	36.0731	0.281687
RIL115_07_1wkf_EM10x1_30s	RIL115	1	1.87192	0.534429	0.368927	0.166418	0.0210955	62.8117	34.6931	0.447665
RIL115_05_1wkf_EM10x1_30s	RIL115	1	0.871621	1.1766	0.975629	0.224916	0.126241	73.504	48.4627	0.340679
RIL115_02_1wkf_EM10x1_30s	RIL115	1	0.975157	1.1095	0.938838	0.202992	0.195437	62.5195	45.3394	0.274796
RIL115_09_1wkf_EM10x1_30s	RIL115	1	0.702106	1.89865	1.68822	0.210436	0.475533	54.6875	26.5625	0.514286
RIL115_08_1wkf_EM10x1_30s	RIL115	1	1.64508	0.717692	0.546555	0.184427	0.177049	67.2057	42.1875	0.372263
RIL113_1_1wkf_EM10x1_30s	RIL113	1	0.809246	1.25021	0.976517	0.295574	0.0904476	52.6844	32.814	0.377159
RIL113_2_1wkf_EM10x1_30s	RIL113	1	1.30805	0.765632	0.489838	0.275794	0.0392348	39.4375	28.4598	0.278357
RIL113_3_1wkf_EM10x1_30s	RIL113	1	0.680143	2.01398	1.71426	0.385526	0.810438	66.7218	43.752	0.344262
RIL113_4_1wkf_EM10x1_30s	RIL113	1	0.787478	1.52678	1.29178	0.26696	0.492342	61.2626	40.4854	0.33915
RIL113_5_1wkf_EM10x1_30s	RIL113	1	0.667198	1.52716	1.2896	0.242892	0.113064	64.5713	51.4086	0.203847
RIL113_6_1wkf_EM10x1_30s	RIL113	1	1.30449	0.778651	0.552006	0.234208	0.118306	54.8647	39.4375	0.281186
RIL113_7_1wkf_EM10x1_30s	RIL113	1	0.805615	1.40336	1.1794	0.277606	0.228798	41.6937	30.6459	0.264975
RIL113_03_1wkf_EM10x1_30s	RIL113	1	1.49325	0.683112	0.459718	0.231873	0.112742	42.1875	26.7457	0.366028
RIL113_02_1wkf_EM10x1_30s	RIL113	1	1.47778	0.691159	0.453913	0.23124	0.175324	45.3394	29.8515	0.341599
RIL113_04_1wkf_EM10x1_30s	RIL113	1	0.836652	1.29739	1.01247	0.28492	0.260341	37.5	18.815	0.498267
RIL113_01_1wkf_EM10x1_30s	RIL113	1	1.68195	0.657499	0.439895	0.2269	0.305412	46.901	28.1684	0.399408
RIL113_06_1wkf_EM10x1_30s	RIL113	1	1.34793	0.761322	0.558355	0.206041	0.144935	78.6855	46.9791	0.402952
RIL113_05_1wkf_EM10x1_30s	RIL113	1	1.10418	0.933819	0.719231	0.223373	0.151552	36.0731	26.7457	0.25857
RIL112_10_1wkf_EM10x1_30s	RIL112	1	0.827899	1.4705	1.25338	0.269751	0.477307	48.1769	29.6135	0.385317
RIL112_1_1wkf_EM10x1_30s	RIL112	1	1.52092	0.698396	0.461916	0.23206	0.271455	59.5594	41.794	0.29828
RIL112_2_1wkf_EM10x1_30s	RIL112	1	0.528085	2.25117	2.06295	0.319315	0.306518	42.7143	30.7044	0.281167
RIL112_3_1wkf_EM10x1_30s	RIL112	1	1.18271	0.855266	0.603275	0.262635	0.0947993	51.4551	29.5528	0.425658
RIL112_4_1wkf_EM10x1_30s	RIL112	1	0.379219	3.05054	2.91429	0.328497	0.744634	53.6408	36.0954	0.327091
RIL112_5_1wkf_EM10x1_30s	RIL112	1	0.405086	4.24853	4.38736	0.250209	2.25685	60.4071	38.2986	0.365991
RIL112_6_1wkf_EM10x1_30s	RIL112	1	2.74052	0.374218	0.225902	0.151009	0.15148	47.0334	29.5326	0.372093
RIL112_7_1wkf_EM10x1_30s	RIL112	1	0.361105	2.79754	2.39338	0.404161	0.110659	38.4234	22.9698	0.402192
RIL112_8_1wkf_EM10x1_30s	RIL112	1	1.4202	0.731943	0.521681	0.222959	0.149451	65.6371	38.283	0.416748
RIL112_9_1wkf_EM10x1_30s	RIL112	1	0.699482	1.4451	1.1917	0.247148	0.109746	68.9875	47.0461	0.318049
RIL111_10_1wkf_EM10x1_30s	RIL111	1	0.878003	1.14103	0.8741	0.272862	0.0419297	43.7657	29.5528	0.324748
RIL111_11_1wkf_EM10x1_30s	RIL111	1	0.565191	2.11916	1.76932	0.376953	0.695908	75.5989	39.3768	0.479135
RIL111_12_1wkf_EM10x1_30s	RIL111	1	2.17959	0.464353	0.270659	0.194964	0.146032	63.4781	40.4854	0.362215
RIL111_1_1wkf_EM10x1_30s	RIL111	1	0.300766	3.72496	3.6794	0.232697	0.47239	62.586	33.9078	0.458221
RIL111_2_1wkf_EM10x1_30s	RIL111	1	0.484649	2.11883	1.8418	0.35125	0.175113	63.5911	36.112	0.432122
RIL111_3_1wkf_EM10x1_30s	RIL111	1	1.31609	0.901438	0.631962	0.278683	0.574814	73.6835	52.548	0.286842
RIL111_4_1wkf_EM10x1_30s	RIL111	1	1.10708	1.07911	0.793679	0.263498	0.375435	49.4151	25.1574	0.490896
RIL111_5_1wkf_EM10x1_30s	RIL111	1	1.26399	0.847798	0.570554	0.293546	0.260588	53.6966	39.4375	0.265548
RIL111_6_1wkf_EM10x1_30s	RIL111	1	0.89476	1.23056	0.956002	0.258577	0.339517	50.3623	36.1616	0.281971
RIL111_7_1wkf_EM10x1_30s	RIL111	1	0.891018	1.1274	0.812561	0.314842	0.0660899	45.9396	38.2986	0.166327
RIL111_8_1wkf_EM10x1_30s	RIL111	1	2.18746	0.540682	0.38404	0.163443	0.229545	52.5024	33.9783	0.352824
RIL110_08_1wkf_EM10x1_30s	RIL110	1	0.825857	1.296	1.11019	0.205279	0.347596	76.8172	51.5862	0.328455
RIL110_05_1wkf_EM10x1_30s	RIL110	1	2.6759	0.3814	0.219213	0.164997	0.146457	58.338	34.5168	0.408331
RIL110_04_1wkf_EM10x1_30s	RIL110	1	1.05274	1.70226	1.54505	0.247982	0.394546	76.5625	42.1875	0.44898
RIL110_11_1wkf_EM10x1_30s	RIL110	1	1.44399	0.750333	0.541871	0.20869	0.422435	78.125	50.0244	0.359688
RIL110_01_1wkf_EM10x1_30s	RIL110	1	1.3463	1.05234	0.863512	0.217085	0.984842	67.1875	39.1873	0.416747
RIL110_10_1wkf_EM10x1_30s	RIL110	1	1.90827	0.526692	0.36109	0.165602	0.0715877	73.4541	50.0976	0.317975
RIL110_03_1wkf_EM10x1_30s	RIL110	1	1.1938	0.842459	0.640256	0.208854	0.0716569	65.625	37.5325	0.428076
RIL110_12_1wkf_EM10x1_30s	RIL110	1	1.33499	0.824424	0.647006	0.194776	0.255095	72.0277	39.0625	0.457674
RIL110_02_1wkf_EM10x1_30s	RIL110	1	2.53712	0.404638	0.197471	0.207477	0.173333	56.2717	29.6875	0.472426
RIL110_06_1wkf_EM10x1_30s	RIL110	1	1.28404	0.820468	0.615783	0.220276	0.175012	73.504	40.655	0.4469
RIL110_07_1wkf_EM10x1_30s	RIL110	1	1.59752	0.654731	0.459638	0.195092	0.17165	50	29.8515	0.40297
RIL110_09_1wkf_EM10x1_30s	RIL110	1	1.18201	1.0523	0.831361	0.200668	0.978922	73.4541	39.0937	0.46778
RIL11_04_1wkf_EM10x1_30s	RIL11	1	1.47541	0.678607	0.454399	0.22379	0.0374191	59.375	29.6875	0.5
RIL11_02_1wkf_EM10x1_30s	RIL11	1	0.995818	1.24213	1.00232	0.253591	0.400266	73.4375	43.7779	0.403876
RIL11_08_1wkf_EM10x1_30s	RIL11	1	1.76076	0.570348	0.382492	0.190899	0.0606709	70.3819	31.289	0.555439
RIL11_06_1wkf_EM10x1_30s	RIL11	1	0.678384	1.54979	1.38413	0.214897	0.167706	53.148	32.8497	0.38192
RIL11_03_1wkf_EM10x1_30s	RIL11	1	1.43157	0.95508	0.743057	0.229408	1.37223	56.2717	31.289	0.443965
RIL11_05_1wkf_EM10x1_30s	RIL11	1	1.80647	0.558882	0.338716	0.220165	0.0903326	54.888	29.7286	0.458377
RIL11_01_1wkf_EM10x1_30s	RIL11	1	1.78147	0.562466	0.351068	0.213902	0.0419176	75.1463	43.8615	0.416319
RIL11_07_1wkf_EM10x1_30s	RIL11	1	1.32251	0.806503	0.62871	0.194785	0.130318	75.1463	39.0937	0.479765
RIL11_09_1wkf_EM10x1_30s	RIL11	1	0.874695	1.1839	1.01093	0.200748	0.136046	61.0176	31.25	0.487852
RIL11_10_1wkf_EM10x1_30s	RIL11	1	1.32741	0.754105	0.561731	0.192374	0.0317586	46.875	31.289	0.332501
RIL109_12_1wkf_EM10x1_30s	RIL109	1	1.74155	0.588512	0.420662	0.175728	0.0950014	66.0884	31.289	0.526558
RIL109_11_1wkf_EM10x1_30s	RIL109	1	1.32527	0.80569	0.599425	0.221885	0.219608	50.0244	31.289	0.374525
RIL109_07_1wkf_EM10x1_30s	RIL109	1	1.81356	0.557691	0.376578	0.186854	0.0752384	63.1992	29.7286	0.529605
RIL109_06_1wkf_EM10x1_30s	RIL109	1	2.5023	0.399961	0.223571	0.177475	0.0302416	48.4627	32.8125	0.322933
RIL109_10_1wkf_EM10x1_30s	RIL109	1	1.47654	0.685452	0.507421	0.178031	0.106537	52.151	31.5996	0.394075
RIL109_04_1wkf_EM10x1_30s	RIL109	1	1.50904	0.666218	0.441046	0.229288	0.071223	55.2427	29.8515	0.45963
RIL109_09_1wkf_EM10x1_30s	RIL109	1	1.11955	1.25333	1.08416	0.213139	0.330133	65.6436	45.3394	0.309309
RIL109_05_1wkf_EM10x1_30s	RIL109	1	1.10154	0.913781	0.680659	0.233121	0.0882717	75.0163	42.2164	0.437236
RIL109_08_1wkf_EM10x1_30s	RIL109	1	1.21587	0.836071	0.625991	0.222711	0.101702	78.1875	45.3125	0.420463
RIL109_02_1wkf_EM10x1_30s	RIL109	1	2.29379	0.441129	0.232076	0.209052	0.104776	57.8336	42.1875	0.270537
RIL109_01_1wkf_EM10x1_30s	RIL109	1	1.70145	0.588094	0.330471	0.258612	0.0246262	75	42.2164	0.437114
RIL109_03_1wkf_EM10x1_30s	RIL109	1	1.61976	0.620847	0.382671	0.239352	0.0737771	56.2717	25.1946	0.552269
RIL107_06_1wkf_EM10x1_30s	RIL107	1	1.92128	0.521203	0.303756	0.217447	0.0385565	84.4329	45.3394	0.463012
RIL107_07_1wkf_EM10x1_30s	RIL107	1	1.42951	0.72411	0.512285	0.213652	0.164893	73.504	37.5325	0.489381
RIL107_01_1wkf_EM10x1_30s	RIL107	1	2.20547	0.457221	0.238766	0.221323	0.0813237	57.8336	29.6875	0.486674
RIL107_09_1wkf_EM10x1_30s	RIL107	1	3.05617	0.334024	0.129163	0.204862	0.205083	62.5781	31.4059	0.498133
RIL107_04_1wkf_EM10x1_30s	RIL107	1	1.76771	0.576568	0.37582	0.207682	0.0881646	57.8336	37.5325	0.351026
RIL107_08_1wkf_EM10x1_30s	RIL107	1	2.12859	0.473003	0.265967	0.207036	0.0740366	71.875	43.75	0.391304
RIL107_10_1wkf_EM10x1_30s	RIL107	1	1.01457	1.11216	0.855881	0.256281	0.287569	76.6262	40.655	0.469437
RIL107_11_1wkf_EM10x1_30s	RIL107	1	0.755994	1.35043	1.11277	0.237541	0.136593	66.0884	28.1684	0.573777
RIL107_03_1wkf_EM10x1_30s	RIL107	1	2.44118	0.410924	0.243867	0.169165	0.0475591	64.0816	31.25	0.51234
RIL107_12_1wkf_EM10x1_30s	RIL107	1	0.96387	1.09116	0.887258	0.235053	0.251775	82.9451	29.6875	0.642082
RIL107_05_1wkf_EM10x1_30s	RIL107	1	0.976019	1.14812	0.878213	0.247036	0.396056	90.7461	57.8125	0.362921
RIL107_02_1wkf_EM10x1_30s	RIL107	1	3.48357	0.347456	0.215901	0.134065	0.374647	76.6262	31.289	0.591667
RIL106_1_1wkf_10x9300_30	RIL106	1	1.81672	0.632519	0.395139	0.244943	0.511819	52.5024	30.6264	0.416667
RIL106_2_1wkf_10x9300_30	RIL106	1	1.15869	0.975789	0.751223	0.234833	0.301765	51.4202	29.5326	0.425662
RIL106_3_1wkf_10x9300_30	RIL106	1	1.0558	0.948455	0.724129	0.225898	0.0370297	64.5713	28.4388	0.559575
RIL106_4_1wkf_10x9300_30	RIL106	1	1.19951	0.83599	0.624255	0.214351	0.051693	50.5047	28.4598	0.436491
RIL106_5_1wkf_10x9300_30	RIL106	1	0.803397	1.25793	1.0212	0.251868	0.0962253	51.5132	26.4555	0.486433
RIL106_6_1wkf_10x9300_30	RIL106	1	1.15833	0.896563	0.688647	0.222501	0.186029	67.2932	38.4234	0.429015
RIL106_7_1wkf_10x9300_30	RIL106	1	0.925376	1.20303	0.956586	0.278385	0.358388	58.1363	30.8017	0.470181
RIL106_8_1wkf_10x9300_30	RIL106	1	1.73642	0.577853	0.369413	0.20844	0.055384	49.221	28.4598	0.421795
RIL105_07_1wkf_EM10x1_30s	RIL105	1	1.1176	0.913795	0.733062	0.196332	0.105847	75	42.2164	0.437114
RIL105_09_1wkf_EM10x1_30s	RIL105	1	2.22253	0.455974	0.283557	0.175351	0.113831	70.3125	43.7779	0.377381
RIL105_03_1wkf_EM10x1_30s	RIL105	1	1.27671	0.789221	0.617039	0.172984	0.0868195	53.148	35.9375	0.323822
RIL105_06_1wkf_EM10x1_30s	RIL105	1	2.8304	0.353892	0.197105	0.156319	0.0405253	68.9096	40.625	0.41046
RIL105_10_1wkf_EM10x1_30s	RIL105	1	2.10911	0.484218	0.30954	0.179804	0.102709	65.625	50	0.238095
RIL105_08_1wkf_EM10x1_30s	RIL105	1	1.97901	0.518905	0.355913	0.169236	0.0955687	58.1494	29.7286	0.488755
RIL105_04_1wkf_EM10x1_30s	RIL105	1	1.07316	0.932781	0.764755	0.167257	0.0336814	68.9096	51.5625	0.251737
RIL105_01_1wkf_EM10x1_30s	RIL105	1	1.25624	0.829217	0.688672	0.150615	0.148126	59.3956	40.625	0.316026
RIL105_02_1wkf_EM10x1_30s	RIL105	1	2.08043	0.48096	0.301175	0.179785	0.0261393	64.0625	34.4105	0.462861
RIL105_05_1wkf_EM10x1_30s	RIL105	1	2.10506	0.484007	0.312117	0.17189	0.109186	76.6262	51.5862	0.326782
RIL104_1_1wkf_10x9300_30	RIL104	1	1.29678	0.781229	0.550192	0.237505	0.122486	43.7657	25.1812	0.424637
RIL104_2_1wkf_10x9300_30	RIL104	1	1.38944	0.746937	0.52505	0.236543	0.17384	45.9396	28.4388	0.380952
RIL104_3_1wkf_10x9300_30	RIL104	1	2.1603	0.469576	0.258856	0.21072	0.143669	45.9526	27.345	0.404931
RIL104_4_1wkf_10x9300_30	RIL104	1	1.66221	0.616453	0.383871	0.236618	0.185511	41.5644	32.8322	0.210088
RIL104_6_1wkf_10x9300_30	RIL104	1	1.13555	0.883178	0.650929	0.236089	0.0528127	47.0334	28.4598	0.394902
RIL104_8_1wkf_10x9300_30	RIL104	1	2.08847	0.499531	0.273959	0.229757	0.158581	47.0461	28.4598	0.395065
RIL104_9_1wkf_10x9300_30	RIL104	1	1.85307	0.589589	0.381354	0.214968	0.165379	50.3267	24.0636	0.521852
RIL104_04_1wkf_EM10x1_30s	RIL104	1	0.683024	1.56679	1.34226	0.278612	0.193279	57.8336	25.4357	0.560192
RIL104_02_1wkf_EM10x1_30s	RIL104	1	0.840279	1.25686	1.04501	0.224561	0.376756	48.8391	28.5129	0.416186
RIL104_01_1wkf_EM10x1_30s	RIL104	1	0.752144	1.36495	1.1605	0.234831	0.138375	56.2717	42.1875	0.250289
RIL104_05_1wkf_EM10x1_30s	RIL104	1	0.701292	1.43008	1.24384	0.186246	0.0544418	28.1684	15.625	0.4453
RIL104_06_1wkf_EM10x1_30s	RIL104	1	1.93405	0.517454	0.334227	0.183595	0.0276093	29.7286	17.1875	0.421853
RIL104_03_1wkf_EM10x1_30s	RIL104	1	1.38085	0.72607	0.535774	0.190296	0.0504447	43.75	29.7286	0.320489
RIL103_1_1wkf_10x9300_30	RIL103	1	1.45387	0.803344	0.569363	0.233982	0.196598	67.0438	37.1892	0.4453
RIL103_2_1wkf_10x9300_30	RIL103	1	0.798744	1.27461	0.96338	0.292564	0.110185	53.5962	29.5528	0.448602
RIL103_3_1wkf_10x9300_30	RIL103	1	1.13999	0.883885	0.60252	0.290738	0.0760898	56.8881	30.6264	0.461638
RIL103_4_1wkf_10x9300_30	RIL103	1	2.65692	0.378299	0.191067	0.189543	0.0561973	50.3148	31.7202	0.369565
RIL103_5_1wkf_10x9300_30	RIL103	1	1.40365	1.22706	0.918819	0.283436	2.61438	67.8949	32.8868	0.515622
RIL103_6_1wkf_10x9300_30	RIL103	1	2.28259	0.452706	0.225951	0.230037	0.21342	70.0801	43.7657	0.37549
RIL103_7_1wkf_10x9300_30	RIL103	1	2.15765	0.463777	0.267196	0.196686	0.0258133	67.1597	38.2986	0.429738
RIL103_8_1wkf_10x9300_30	RIL103	1	2.11138	0.473969	0.240401	0.23391	0.0280965	71.2315	32.8322	0.539077
RIL102_01_1wkf_EM10x1_30s	RIL102	1	1.77133	0.567432	0.325373	0.24613	0.0570426	60.9575	40.655	0.33306
RIL102_02_1wkf_EM10x1_30s	RIL102	1	3.05436	0.345332	0.171364	0.17396	0.31785	56.2717	32.8497	0.416231
RIL102_03_1wkf_EM10x1_30s	RIL102	1	0.863713	1.24299	1.06748	0.198763	0.203664	68.75	45.3125	0.340909
RIL102_04_1wkf_EM10x1_30s	RIL102	1	2.07689	0.486184	0.269231	0.216953	0.0968953	46.901	29.7286	0.366142
RIL102_05_1wkf_EM10x1_30s	RIL102	1	1.49095	0.67103	0.480236	0.190793	0.0218153	51.5625	21.875	0.575758
RIL102_06_1wkf_EM10x1_30s	RIL102	1	2.3142	0.434793	0.245248	0.189669	0.0689418	51.5625	29.7286	0.423446
RIL102_07_1wkf_EM10x1_30s	RIL102	1	2.27692	0.439465	0.221345	0.218148	0.0262232	59.3956	26.5625	0.552786
RIL102_08_1wkf_EM10x1_30s	RIL102	1	1.56318	0.658853	0.477983	0.188081	0.151597	51.5862	29.6875	0.424507
RIL102_09_1wkf_EM10x1_30s	RIL102	1	0.821361	1.23536	1.03962	0.20432	0.116863	53.125	25.0488	0.528494
RIL102_10_1wkf_EM10x1_30s	RIL102	1	2.19984	0.480994	0.23825	0.246587	0.179398	73.4375	43.7779	0.403876
RIL101_1_1wkf_10x9300_30	RIL101	1	1.14161	1.07986	0.836155	0.274669	0.182889	39.3768	22.9698	0.416667
RIL101_2_1wkf_10x9300_30	RIL101	1	1.50585	0.860841	0.585372	0.288198	0.758638	70.0801	36.2442	0.482817
RIL101_3_1wkf_10x9300_30	RIL101	1	1.08332	1.06207	0.694047	0.373712	0.525179	78.784	44.8591	0.430606
RIL101_4_1wkf_10x9300_30	RIL101	1	1.42679	1.15969	0.900509	0.293794	2.28793	48.5726	26.4555	0.455341
RIL101_5_1wkf_10x9300_30	RIL101	1	0.481751	2.22808	1.94593	0.328483	0.321912	71.4328	31.569	0.55806
RIL101_6_1wkf_10x9300_30	RIL101	1	1.02961	0.979068	0.692431	0.286637	0.0899434	70.0801	37.2053	0.469103
RIL101_7_1wkf_10x9300_30	RIL101	1	1.85312	0.540801	0.311215	0.229683	0.0453637	75.5989	38.5322	0.490307
RIL101_8_1wkf_10x9300_30	RIL101	1	1.11875	1.10219	0.842595	0.24781	0.576887	61.4089	36.112	0.411942
RIL101_9_1wkf_10x9300_30	RIL101	1	1.87737	0.535444	0.30578	0.229664	0.0706325	70.0374	36.0954	0.484627
RIL100_01_1wkf_EM10x1_30s	RIL100	1	0.809432	1.23656	0.967961	0.268604	0.0311415	53.148	29.7286	0.440645
RIL100_02_1wkf_EM10x1_30s	RIL100	1	1.88917	0.529615	0.292807	0.237122	0.0234646	64.1387	39.0937	0.390481
RIL100_03_1wkf_EM10x1_30s	RIL100	1	1.1376	0.882567	0.637817	0.251969	0.0593925	40.745	25	0.386428
RIL100_04_1wkf_EM10x1_30s	RIL100	1	2.04515	0.493103	0.257017	0.236032	0.128138	32.8125	17.2584	0.47403
RIL100_06_1wkf_EM10x1_30s	RIL100	1	1.94836	0.513782	0.317648	0.196134	0.0325698	34.375	18.815	0.452655
RIL100_07_1wkf_EM10x1_30s	RIL100	1	1.12418	0.90398	0.683645	0.229625	0.117227	43.8615	31.289	0.286639
RIL100_08_1wkf_EM10x1_30s	RIL100	1	2.33712	0.429677	0.242247	0.18743	0.0612467	40.655	28.125	0.308204
RIL100_09_1wkf_EM10x1_30s	RIL100	1	2.11523	0.494288	0.303056	0.191231	0.162347	34.4105	20.3725	0.407957
RIL10_1_1wkf_10x9300_30	RIL10	1	2.16626	0.484583	0.244769	0.240161	0.236946	49.2332	25.1812	0.488532
RIL10_2_1wkf_10x9300_30	RIL10	1	1.99018	0.503159	0.305369	0.19779	0.0379597	25.1574	18.5946	0.26087
RIL10_3_1wkf_10x9300_30	RIL10	1	2.03711	0.492916	0.277371	0.218224	0.0617258	36.2442	25.1574	0.305893
RIL10_4_1wkf_10x9300_30	RIL10	1	1.42707	0.701284	0.450315	0.25097	0.0278653	43.7657	18.7228	0.572203
RIL10_5_1wkf_10x9300_30	RIL10	1	1.6306	0.61382	0.392733	0.220744	0.029841	41.6937	19.6884	0.527785
RIL10_6_1wkf_10x9300_30	RIL10	1	1.55848	0.646581	0.3953	0.25128	0.080374	38.283	24.0636	0.371429
RIL10_7_1wkf_10x9300_30	RIL10	1	1.79748	0.561472	0.350814	0.20782	0.110315	32.8322	19.7188	0.399408
RIL10_8_1wkf_10x9300_30	RIL10	1	1.60385	0.624132	0.366846	0.257573	0.0329107	35.0016	17.5008	0.5
RIL10_9_1wkf_10x9300_30	RIL10	1	1.64454	0.613477	0.430208	0.181056	0.083518	53.6966	35.0699	0.346887
RIL1_10_1wkf_10x9300_30	RIL1	1	1.52483	1.24514	0.993431	0.277702	0.551247	30.9373	19.8096	0.359688
RIL1_11_1wkf_10x9300_30	RIL1	1	1.47039	0.87503	0.619076	0.265841	0.772114	37.2053	25.1574	0.323822
RIL1_1_1wkf_10x9300_30	RIL1	1	1.02569	1.06803	0.831337	0.248526	0.318363	43.752	30.6264	0.3
RIL1_2_1wkf_10x9300_30	RIL1	1	2.41977	0.413359	0.210246	0.203127	0.016145	48.2389	31.7202	0.342436
RIL1_3_1wkf_10x9300_30	RIL1	1	1.43456	0.698467	0.459048	0.243246	0.0419212	45.9396	27.345	0.404762
RIL1_4_1wkf_10x9300_30	RIL1	1	1.92785	0.521949	0.28362	0.238588	0.079319	35.0016	17.5349	0.499024
RIL1_5_1wkf_10x9300_30	RIL1	1	1.10265	1.13885	0.888765	0.27014	0.643367	41.6937	20.897	0.498797
RIL1_6_1wkf_10x9300_30	RIL1	1	1.67515	0.603716	0.341901	0.261867	0.104182	50.3267	24.0884	0.521358
RIL1_7_1wkf_10x9300_30	RIL1	1	0.805884	1.25065	0.986708	0.268211	0.101629	43.8067	30.7044	0.299092
RIL1_8_1wkf_10x9300_30	RIL1	1	0.713941	1.52559	1.23853	0.286511	0.247526	58.1363	32.8868	0.434315
RIL1_9_1wkf_10x9300_30	RIL1	1	1.33393	0.758513	0.527123	0.240722	0.0826686	31.7391	20.7822	0.345217
