# Supplementary material for: Complex Genetic Architecture of Cardiac Disease in a Wild Type Inbred Strain of Drosophila melanogaster
Source: PLoS One. 2013 Apr 29;8(4):e62909. doi: 10.1371/journal.pone.0062909 (PMC3639251; doi:10.1371/journal.pone.0062909)
Supplement: Table S4 — Gene list detected in 5 or more RIL lines with stop codons according to flybase. Of the 147 stop codons, 53 of the associated genes have unknown functions and 37 have functions related to metabolism. (XLSX) [file pone.0062909.s007.xlsx]

## Sheet: Sheet1
Complete List of all Stop Codons:			53 unknown fnc		37 Metabolism
Chr	Position	Gene Name	Gene Strand	Region	Reference Base	Input Base	Variation Type	Original Amino Acid	Modified Amino Acid	Tag	Counts	Fnc
chr2R	14911356	5-HT1B	-	Coding	A	T	SNP	L(2TTA)	*	chr2R14911356	15	entrainment of circadian clock; phospholipase C-activating serotonin receptor signaling pathway; adenylate cyclase-inhibiting serotonin receptor signaling pathway
chr2L	12391935	bru-2	+	Coding	C	A	SNP	S(2TCA)	*	chr2L12391935	8	Metabolism
chr2L	3869815	Cep97	+	Coding	A	T	SNP	K(1AAA)	*	chr2L3869815	5	centriole replication
chr3R	8684908	CG10126	-	Coding	C	T	SNP	W(2TGG)	*	chr3R8684908	12	neurogenesis
chr2R	10705467	CG10202	-	Coding	G	A	SNP	Q(1CAA)	*	chr2R10705467	18	Metabolism
chr3R	12705876	CG10349	+	Coding	G	T	SNP	G(1GGA)	*	chr3R12705876	20	unknown
chr2L	20133851	CG10651	-	Coding	T	A	SNP	K(1AAG)	*	chr2L20133851	12	Reproductive fnc
chr3R	3635566	CG10928	+	Coding	C	G	SNP	S(2TCA)	*	chr3R3635566	17	unknown
chr2L	5718622	CG11149	-	Coding	G	A	SNP	Q(1CAG)	*	chr2L5718622	13	N-acetyllactosaminide beta-1,3-N-acetylglucosaminyltransferase activity
chr3L	21673607	CG11248	+	Coding	C	G	SNP	Y(3TAC)	*	chr3L21673607	17	unknown
chr2L	7068532	CG11289	+	Coding	C	T	SNP	Q(1CAG)	*	chr2L7068532	18	Metabolism
chr3R	25062302	CG11951	-	Coding	C	A	SNP	E(1GAA)	*	chr3R25062302	5	Metabolism
chr3L	1615191	CG12105	-	Coding	C	A	SNP	E(1GAA)	*	chr3L1615191	11	unknown
chr2R	10866535	CG12424	+	Coding	G	A	SNP	W(2TGG)	*	chr2R10866535	10	transmembrane receptor protein tyrosine phosphatase signaling pathway; axon guidance; axonogenesis
chrX	13008199	CG12714	-	Coding	T	A	SNP	K(1AAG)	*	chrX13008199	5	transferase activity, transferring hexosyl groups
chr2R	10527965	CG12862	-	Coding	G	T	SNP	S(2TCA)	*	chr2R10527965	7	unknown
chr2L	19559469	CG13079	+	Coding	A	T	SNP	R(1AGA)	*	chr2L19559469	16	endopeptidase inhibitor activity
chr2L	19561631	CG13079	+	Coding	G	T	SNP	E(1GAA)	*	chr2L19561631	15	endopeptidase inhibitor activity
chr2L	19559877	CG13079	+	Coding	C	T	SNP	Q(1CAG)	*	chr2L19559877	13	endopeptidase inhibitor activity
chr2L	9164614	CG13108	+	Coding	C	G	SNP	Y(3TAC)	*	chr2L9164614	16	unknown
chr2L	9983787	CG13130	-	Coding	C	A	SNP	E(1GAA)	*	chr2L9983787	9	unknown
chr2R	8267783	CG13155	-	Coding	C	T	SNP	W(3TGG)	*	chr2R8267783	18	unknown
chr2L	16758391	CG13278	-	Coding	C	A	SNP	E(1GAA)	*	chr2L16758391	16	sodium ion transport
chr2R	17717710	CG13492	-	Coding	C	T	SNP	W(3TGG)	*	chr2R17717710	12	unknown
chr2R	20380191	CG13589	-	Coding	G	T	SNP	Y(3TAC)	*	chr2R20380191	14	unknown
chr3R	20386246	CG13624	-	Coding	G	T	SNP	S(2TCA)	*	chr3R20386246	10	Metabolism
chr3L	18292745	CG13700	-	Coding	G	A	SNP	Q(1CAA)	*	chr3L18292745	16	unknown
chr3R	19503317	CG13822	+	Coding	G	A	SNP	W(3TGG)	*	chr3R19503317	13	unknown
chrX	8282016	CG1387	+	Coding	C	A	SNP	S(2TCG)	*	chrX8282016	19	unknown
chr2L	5518130	CG14020	+	Coding	G	T	SNP	E(1GAG)	*	chr2L5518130	8	Golgi organization; negative regulation of mitotic cell cycle
chr3L	13001824	CG14117	+	Coding	C	T	SNP	Q(1CAA)	*	chr3L13001824	13	zinc ion binding; nucleic acid binding.
chr3R	13282363	CG14330	-	Coding	C	A	SNP	E(1GAA)	*	chr3R13282363	14	unknown
chr3R	9222649	CG14374	-	Coding	A	T	SNP	L(2TTA)	*	chr3R9222649	6	unknown
chrX	6610559	CG14441	+	Coding	T	G	SNP	Y(3TAT)	*	chrX6610559	15	DNA binding; zinc ion binding
chrX	6610559	CG14441	+	Coding	T	A	SNP	Y(3TAT)	*	chrX6610559	15	DNA binding; zinc ion binding
chr3R	7446294	CG14710	+	Coding	T	A	SNP	L(2TTG)	*	chr3R7446294	7	nucleic acid binding
chr3L	6455163	CG14910	+	Coding	G	A	SNP	W(2TGG)	*	chr3L6455163	8	unknown
chr3L	2659638	CG14950	-	Coding	C	A	SNP	E(1GAA)	*	chr3L2659638	14	unknown
chrX	20030512	CG15322	+	Coding	T	A	SNP	L(2TTG)	*	chrX20030512	6	unknown
chrX	8291855	CG15345	-	Coding	G	T	SNP	S(2TCG)	*	chrX8291855	18	unknown
chr2L	2592122	CG15394	+	Coding	C	A	SNP	S(2TCA)	*	chr2L2592122	17	unknown
chr3R	26926063	CG15553	-	Coding	G	T	SNP	C(3TGC)	*	chr3R26926063	11	transmembrane transporter activity.
chr2L	884040	CG15824	-	Coding	G	A	SNP	Q(1CAA)	*	chr2L884040	17	unknown
chr2L	11591440	CG15841	-	Coding	T	A	SNP	K(1AAA)	*	chr2L11591440	5	Reproductive fnc
chr3R	16563523	CG17267	-	Coding	A	T	SNP	L(2TTA)	*	chr3R16563523	5	unknown
chrX	21479753	CG17450	-	Coding	T	A	SNP	K(1AAG)	*	chrX21479753	6	microtubule cytoskeleton organization
chr2L	22443017	CG17493	+	Coding	T	A	SNP	L(2TTG)	*	chr2L22443017	6	calcium ion binding
chr2L	14345946	CG18125	-	Coding	G	A	SNP	R(1CGA)	*	chr2L14345946	6	proteolysis
chr2L	14796172	CG18420	-	Coding	G	T	SNP	C(3TGC)	*	chr2L14796172	14	Metabolism
chr2L	15400380	CG18482	-	Coding	G	T	SNP	C(3TGC)	*	chr2L15400380	20	unknown
chr2R	14184856	CG18538	+	Coding	C	G	SNP	Y(3TAC)	*	chr2R14184856	11	unknown
chr3L	2794017	CG2083	-	Coding	G	A	SNP	Q(1CAG)	*	chr3L2794017	6	DNA binding; zinc ion binding
chr3L	1311310	CG2469	+	Coding	C	T	SNP	R(1CGA)	*	chr3L1311310	12	unknown
chr2R	3847170	CG2915	-	Coding	G	A	SNP	Q(1CAA)	*	chr2R3847170	12	Metabolism
chr2L	4149996	CG2955	+	Coding	T	A	SNP	Y(3TAT)	*	chr2L4149996	18	structural constituent of cytoskeleton
chr2R	13379054	CG30104	+	Coding	G	A	SNP	W(2TGG)	*	chr2R13379054	8	nucleotide catabolic process
chr2R	18721122	CG30265	+	Coding	C	A	SNP	Y(3TAC)	*	chr2R18721122	9	transmembrane transport
chr2R	4353319	CG30360	+	Coding	C	A	SNP	Y(3TAC)	*	chr2R4353319	19	Metabolism
chr2R	17187949	CG30386	+	Coding	C	T	SNP	R(1CGA)	*	chr2R17187949	12	unknown
chr2R	7004359	CG30490	-	Coding	G	A	SNP	Q(1CAG)	*	chr2R7004359	16	unknown
chr3R	20879383	CG31109	-	Coding	T	A	SNP	K(1AAA)	*	chr3R20879383	10	zinc ion binding
chr3R	25065275	CG31427	-	Coding	G	T	SNP	C(3TGC)	*	chr3R25065275	10	Metabolism
chr2L	20603680	CG31677	-	Coding	C	A	SNP	E(1GAA)	*	chr2L20603680	18	unknown
chr2L	16877849	CG31781	+	Coding	C	T	SNP	Q(1CAG)	*	chr2L16877849	9	lateral inhibition
chr2L	16701241	CG31782	-	Coding	T	A	SNP	K(1AAG)	*	chr2L16701241	19	unknown
chr2L	17102521	CG31784	-	Coding	G	A	SNP	R(1CGA)	*	chr2L17102521	15	unknown
chr2L	19000578	CG31792	+	Coding	G	T	SNP	E(1GAG)	*	chr2L19000578	9	ATPase activity, coupled to transmembrane movement of substances; transporter activity
chr2L	15888031	CG31824	+	Coding	C	A	SNP	Y(3TAC)	*	chr2L15888031	6	proteolysis
chr3L	10421593	CG32060	+	Coding	G	A	SNP	W(3TGG)	*	chr3L10421593	8	lateral inhibition
chr3L	12905165	CG32115	-	Coding	C	T	SNP	W(2TGG)	*	chr3L12905165	18	unknown
chr2R	8251779	CG33013	+	Coding	G	T	SNP	G(1GGA)	*	chr2R8251779	19	peptidase activity
chr3R	19416264	CG33337	-	Coding	G	T	SNP	S(2TCA)	*	chr3R19416264	9	unknown
chr3R	24496151	CG33346	+	Coding	G	A	SNP	W(2TGG)	*	chr3R24496151	9	metal ion binding; hydrolase activity; nucleic acid binding
chr2R	11583600	CG33461	+	Coding	A	T	SNP	R(1AGA)	*	chr2R11583600	10	Metabolism
chr2R	11783867	CG33463	-	Coding	G	T	SNP	C(3TGC)	*	chr2R11783867	11	unknown
chr2L	3271429	CG3347	+	Coding	G	T	SNP	E(1GAA)	*	chr2L3271429	7	zinc ion binding
chr2L	15236229	CG33911	+	Coding	C	A	SNP	Y(3TAC)	*	chr2L15236229	16	unknown
chr2R	20588243	CG33988	-	Coding	C	A	SNP	E(1GAG)	*	chr2R20588243	9	unknown
chr2L	8010262	CG34010	-	Coding	C	A	SNP	E(1GAA)	*	chr2L8010262	14	unknown
chr3R	26335321	CG34041	+	Coding	G	T	SNP	E(1GAA)	*	chr3R26335321	9	Metabolism
chr3R	26335328	CG34041	+	Coding	T	A	SNP	L(2TTA)	*	chr3R26335328	7	Metabolism
chr3R	19066779	CG34111	-	Coding	A	C	SNP	L(2TTA)	*	chr3R19066779	10	unknown
chr3R	6484581	CG34304	+	Coding	A	T	SNP	K(1AAA)	*	chr3R6484581	21	unknown
chr3L	15681900	CG34451	-	Coding	G	A	SNP	R(1CGA)	*	chr3L15681900	6	Metabolism
chr2R	10657281	CG42254	-	Coding	A	C	SNP	L(2TTA)	*	chr2R10657281	21	unknown
chr2R	10657481	CG42254	-	Coding	C	T	SNP	W(3TGG)	*	chr2R10657481	20	unknown
chr3L	6063062	CG42269	+	Coding	C	A	SNP	S(2TCA)	*	chr3L6063062	17	secondary active organic cation transmembrane transporter activity
chr3R	17586687	CG42335	+	Coding	C	T	SNP	Q(1CAA)	*	chr3R17586687	13	Metabolism
chr3L	2021118	CG42357	-	Coding	T	A	SNP	K(1AAA)	*	chr3L2021118	9	unknown
chr3R	23196651	CG42534	+	Coding	C	G	SNP	Y(3TAC)	*	chr3R23196651	7	unknown
chr3R	19189257	CG4408	-	Coding	C	A	SNP	E(1GAA)	*	chr3R19189257	7	Metabolism
chr2L	16609842	CG4631	+	Coding	A	T	SNP	R(1AGA)	*	chr2L16609842	15	unknown
chr2L	14774341	CG4650	-	Coding	C	T	SNP	W(3TGG)	*	chr2L14774341	17	Metabolism
chr3R	6987842	CG4757	+	Coding	A	T	SNP	K(1AAG)	*	chr3R6987842	16	carboxylesterase activity
chr2R	12675925	CG5522	+	Coding	C	A	SNP	S(2TCA)	*	chr2R12675925	5	small GTPase mediated signal transduction
chr2L	13272666	CG6043	+	Coding	T	A	SNP	L(2TTG)	*	chr2L13272666	9	unknown
chr3L	11637563	CG6071	-	Coding	A	T	SNP	Y(3TAT)	*	chr3L11637563	16	Metabolism
chr3R	17841524	CG6332	+	Coding	C	T	SNP	Q(1CAG)	*	chr3R17841524	13	unknown
chr2L	7476157	CG6441	+	Coding	C	A	SNP	Y(3TAC)	*	chr2L7476157	6	unknown
chr2L	10841828	CG6700	-	Coding	G	A	SNP	Q(1CAA)	*	chr2L10841828	8	unknown
chr2L	10841818	CG6700	-	Coding	A	T	SNP	L(2TTA)	*	chr2L10841818	6	unknown
chr3R	18613523	CG7029	+	Coding	T	A	SNP	L(2TTG)	*	chr3R18613523	17	protein phosphatase 1 binding
chr3R	14114086	CG7131	-	Coding	C	A	SNP	G(1GGA)	*	chr3R14114086	13	unknown
chr3L	11477512	CG7543	+	Coding	A	T	SNP	K(1AAG)	*	chr3L11477512	14	unknown
chr3L	11474091	CG7543	+	Coding	T	A	SNP	L(2TTG)	*	chr3L11474091	11	unknown
chr2R	4346474	CG8693	+	Coding	T	A	SNP	L(2TTA)	*	chr2R4346474	8	Metabolism
chr3L	14790738	CG9425	+	Coding	C	A	SNP	Y(3TAC)	*	chr3L14790738	5	nucleotide binding; nucleoside-triphosphatase activity; zinc ion binding; nucleic acid binding
chr2L	8961925	CG9525	-	Coding	C	A	SNP	E(1GAA)	*	chr2L8961925	8	unknown
chrX	16600030	CG9672	-	Coding	G	A	SNP	Q(1CAA)	*	chrX16600030	20	Metabolism
chrX	16597203	CG9673	-	Coding	C	T	SNP	W(2TGG)	*	chrX16597203	10	Metabolism
chr3R	24462943	CG9988	+	Coding	C	T	SNP	Q(1CAA)	*	chr3R24462943	16	Metabolism
chr2R	16738713	CG9993	-	Coding	G	T	SNP	C(3TGC)	*	chr2R16738713	16	Metabolism
chr2R	7153022	Cpr47Ee	+	Coding	G	T	SNP	G(1GGA)	*	chr2R7153022	18	structural constituent of chitin-based cuticle; structural constituent of chitin-based larval cuticle
chr3L	10885172	Cpr67Fa2	+	Coding	C	T	SNP	Q(1CAG)	*	chr3L10885172	15	structural constituent of chitin-based cuticle
chr2R	3860135	CSN4	+	Coding	C	G	SNP	Y(3TAC)	*	chr2R3860135	7	Metabolism
chr2R	5126109	Cyp4p2	+	Coding	G	A	SNP	W(2TGG)	*	chr2R5126109	16	Metabolism
chr2R	2860580	Cyp6u1	-	Coding	A	T	SNP	L(2TTG)	*	chr2R2860580	19	Metabolism
chr2L	6293536	Ddr	+	Coding	G	T	SNP	G(1GGA)	*	chr2L6293536	7	Metabolism
chr2L	10919376	dpr2	-	Coding	T	A	SNP	K(1AAG)	*	chr2L10919376	8	sensory perception of chemical stimulus
chr2L	2059873	dpr3	-	Coding	C	A	SNP	G(1GGA)	*	chr2L2059873	5	store-operated calcium entry
chr3L	1716678	drpr	-	Coding	C	A	SNP	E(1GAG)	*	chr3L1716678	13	phagocytosis; apoptotic cell clearance; neuron remodeling; cell competition in a multicellular organism; wing disc dorsal/ventral pattern formation; salivary gland cell autophagic cell death; larval locomotory behavior
chr2L	1791563	Gr22c	-	Coding	G	C	SNP	Y(3TAC)	*	chr2L1791563	7	sensory perception of taste
chr3L	12333472	GRHRII	-	Coding	C	A	SNP	G(1GGA)	*	chr3L12333472	12	G-protein coupled receptor signaling pathway
chr3R	8203069	GstD6	+	Coding	T	G	SNP	L(2TTA)	*	chr3R8203069	7	glutathione metabolic process
chr3L	17812662	Ir75b	-	Coding	G	A	SNP	R(1CGA)	*	chr3L17812662	11	detection of chemical stimulus involved in sensory perception
chr2R	12127520	krimp	-	Coding	C	A	SNP	E(1GAA)	*	chr2R12127520	7	Metabolism
chr2R	5278428	l(2)03659	+	Coding	C	A	SNP	S(2TCA)	*	chr2R5278428	20	multicellular organismal development
chrX	15822435	Lcch3	+	Coding	G	T	SNP	E(1GAA)	*	chrX15822435	17	ion transport
chr2L	2036899	lectin-22C	-	Coding	C	A	SNP	E(1GAA)	*	chr2L2036899	9	Metabolism
chr3L	1218552	LysP	-	Coding	C	T	SNP	W(2TGG)	*	chr3L1218552	14	Metabolism
chr3L	8397370	mkg-p	-	Coding	C	T	SNP	W(2TGG)	*	chr3L8397370	16	zinc ion binding; nucleotidyltransferase activity
chr3R	17192411	mod(mdg4)	+	Coding	C	T	SNP	R(1CGA)	*	chr3R17192411	13	Reproductive fnc
chr2L	13964960	nimB1	+	Coding	C	T	SNP	Q(1CAG)	*	chr2L13964960	7	defense response to bacterium
chr2L	2008849	Nplp4	+	Coding	C	A	SNP	Y(3TAC)	*	chr2L2008849	17	neuropeptide signaling pathway
chr2R	4597598	PGRP-SC1a	+	Coding	G	T	SNP	E(1GAG)	*	chr2R4597598	11	Metabolism
chrX	11568133	Ptp10D	+	Coding	C	A	SNP	S(2TCG)	*	chrX11568133	5	Metabolism
chr3R	26741123	Ptx1	+	Coding	A	T	SNP	K(1AAA)	*	chr3R26741123	13	Metabolism
chr3L	2611557	Pxn	-	Coding	C	T	SNP	W(3TGG)	*	chr3L2611557	21	Metabolism
chr3L	1433299	SA-2	-	Coding	G	C	SNP	Y(3TAC)	*	chr3L1433299	20	unknown
chr3L	21565445	Smc5	+	Coding	C	A	SNP	S(2TCG)	*	chr3L21565445	19	mitosis; mitotic sister chromatid segregation
chr2L	9242941	tai	+	Coding	G	T	SNP	G(1GGA)	*	chr2L9242941	10	Metabolism
chr3R	12084030	tara	+	Coding	C	T	SNP	Q(1CAG)	*	chr3R12084030	8	Metabolism
chr2L	15493542	Tim17b2	+	Coding	C	T	SNP	Q(1CAG)	*	chr2L15493542	16	protein targeting to mitochondrion; protein transport
chr3R	6953442	Ugt86Dd	-	Coding	A	T	SNP	L(2TTG)	*	chr3R6953442	18	Metabolism
chr3R	6992255	Ugt86De	-	Coding	C	T	SNP	W(3TGG)	*	chr3R6992255	10	Metabolism
chr3R	15068229	unc79	-	Coding	G	A	SNP	Q(1CAA)	*	chr3R15068229	10	response to anesthetic
chr2L	11171549	Vm32E	-	Coding	G	T	SNP	S(2TCA)	*	chr2L11171549	7	Reproductive fnc
